# Supplementary material for: Simplified hybrids of two anticancer bistetrahydroisoquinoline alkaloids ecteinascidin 743 and cribrostatin 4 and inhibitory activity against proliferation of cancer cells
Source: Royal Society of Chemistry journal article supplement (doi:10.1039/d2ob01707e), 2022-01-01
Supplement: d2ob01707e1.pdf [file d2ob01707e1.pdf]

## Electronic Supplementary Information

### **Simplified Hybrids of Ecteinascidin 743 and Cribrostatin 4 and Inhibitory Activity against Proliferation of Cancer Cells**

Min Wang, Bao-Bao Yu, Zhu-Jun Yao\*

*State Key Laboratory of Coordination Chemistry, and Jiangsu Key Laboratory of Advanced  
Organic Materials School of Chemistry and Chemical Engineering, Nanjing University, 163  
Xianlin Avenue, Nanjing, Jiangsu 210023, China*

Email: yaoz@nju.edu.cn

#### **Table of Contents**

|                                                                                            |            |
|--------------------------------------------------------------------------------------------|------------|
| <b>1. General methods .....</b>                                                            | <b>S2</b>  |
| <b>2. Experimental procedures and characterizations of compounds .....</b>                 | <b>S2</b>  |
| <b>3. The cytotoxicity test .....</b>                                                      | <b>S21</b> |
| <b>4. Copies of <sup>1</sup>H, <sup>13</sup>C, <sup>19</sup>F and 2D NMR spectra .....</b> | <b>S23</b> |
| <b>5. References .....</b>                                                                 | <b>S63</b> |

## 1. General methods

Unless otherwise noted, all reactions were carried out under nitrogen atmosphere with dry solvents. Tetrahydrofuran (THF) was distilled immediately from sodium-benzophenoneketyl prior to use. Dichloromethane (DCM) was distilled immediately before use from calcium hydride. External bath temperatures were used to record all reaction temperatures. Other solvents were purified according to the reference Purification of Laboratory Chemicals (Seventh Edition). Silica gel (300–400 mesh) and petroleum ether, ethyl acetate (EtOAc), dichloromethane (DCM), methanol (MeOH) and acetone were used for product purification by flash column chromatography. Analytical thin-layer chromatography (TLC) was performed with glass TLC plates, and visualization was accomplished with UV light, phosphomolybdic acid or ammonium molybdate staining and subsequent heating.  $^1\text{H}$  NMR,  $^{13}\text{C}$  NMR and 2D NMR spectra were recorded on either 400 MHz/500 MHz NMR instruments. IR spectra were recorded on Fourier transform infrared spectrometer and listed in  $\text{cm}^{-1}$ . High resolution mass spectral analyses (HRMS) were determined on a Q-TOF-MS spectrometer. Optical rotations were measured with a polarimeter with a sodium lamp.

## 2. Experimental procedures and characterization of compounds

### 2.1 Compound 1

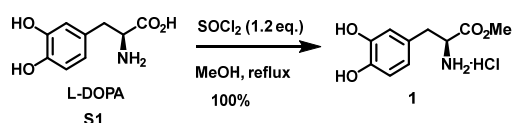

To a suspension of L-DOPA (39.0 g, 200.0 mmol, 1.0 equiv.) in MeOH (500 mL) was added  $\text{SOCl}_2$  (17.0 mL, 240.0 mmol, 1.2 equiv.) dropwise at 0 °C over 30 mins. The reaction mixture was then heated to reflux overnight. The volatiles were removed under reduced pressure. Toluene was added a few times to the mixture and evaporated to remove residual MeOH. The product was collected as a white solid without further purification.

Spectral data of **1** is consistent with the literature.<sup>[1]</sup>  $^1\text{H}$  NMR (400 MHz,  $\text{DMSO}-d_6$ )  $\delta$  8.98 (s, 1H), 8.95 (s, 1H), 8.63 (s, 3H), 6.68 (d,  $J$  = 8.0 Hz, 1H), 6.60 (d,  $J$  = 2.4 Hz, 1H), 6.44 (dd,  $J$  = 8.0, 2.0 Hz, 1H), 4.08 (t,  $J$  = 6.4 Hz, 1H), 3.67 (s, 3H), 3.01 (dd,  $J$  = 14.0, 5.6 Hz, 1H), 2.92 (dd,  $J$  = 14.0, 6.8 Hz, 1H).

### 2.2 Compound 2

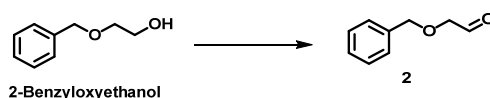

| Entry | Condition                                                                                                               | Yield |
|-------|-------------------------------------------------------------------------------------------------------------------------|-------|
| 1     | DMP (1.2 eq.), DCM, r. t.                                                                                               | 64%   |
| 2     | PCC (1.2 eq.), DCM, r. t.                                                                                               | trace |
| 3     | $(\text{COCl})_2$ (1.2 eq.), DMSO (2.4 eq.), $\text{Et}_3\text{N}$ (6.0 eq.), DCM, -78 °C                               | 81%   |
| 4     | TEMPO (0.01 eq.), KBr (1.0 eq.), $\text{NaHCO}_3$ (1.0 eq.), $\text{NaClO}$ (1.1 eq.), DCM/ $\text{H}_2\text{O}$ , 0 °C | 40%   |

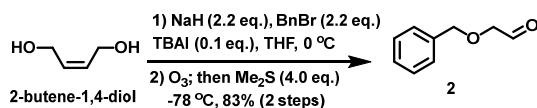

To a stirred solution of 2-*cis*-butene-1,4-diol (20.5 mL, 250.0 mmol, 1.0 equiv.) in THF (500 mL) was added sodium hydride (60% in mineral oil, 22.0 g, 550.0 mmol, 2.2 equiv.) with caution at 0 °C. After stirring for 1 h at 0 °C, benzyl bromide (65.0 mL, 550.0 mmol, 2.2 equiv.) was added dropwise followed by adding TBAI (9.2 g, 25.0 mmol, 0.1 equiv.). The resulting mixture was stirred overnight. The reaction was quenched at 0 °C with saturated aqueous  $\text{NH}_4\text{Cl}$  solution and the mixture was extracted with DCM. The combined extracts were washed with saturated brine, dried ( $\text{Na}_2\text{SO}_4$ ) and concentrated in vacuo.

The resulting crude product was dissolved in DCM/MeOH (3:1, 700 mL) and cooled down to -78 °C. Ozone was bubbled through the reaction until the solution turned blue. The excess ozone was removed by nitrogen stream. Dimethyl sulfide (73.0 mL, 1000.0 mmol, 4.0 equiv.) was then added. The reaction was allowed to warm to room temperature and stirred overnight. The mixture was extracted with DCM. The combined extracts were washed with saturated brine, dried ( $\text{Na}_2\text{SO}_4$ ) and concentrated in vacuo. The residue was purified by silica gel column chromatography (petroleum ether/EtOAc = 10:1) to afford **2** (62.2 g, 83%) as a yellow oil.

Spectral data of **2** is consistent with the literature.<sup>[2]</sup>  $^1\text{H}$  NMR (400 MHz,  $\text{CDCl}_3$ )  $\delta$  9.72 (s, 1H), 7.40-7.27 (m, 5H), 4.63 (s, 2H), 4.10 (s, 2H).

### 2.3 Compound 3

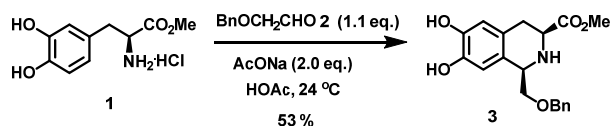

To a suspension of **1** (44.0 g, 178.0 mmol, 1.0 equiv.), NaOAc (29.0 g, 356.0 mmol, 2.0 equiv.) in HOAc (800 mL) was added **2** (29.0 g, 196.0 mmol, 1.1 equiv.) in HOAc (200 mL) dropwise at 0 °C. The reaction mixture was then warmed to room temperature and stirred overnight. HOAc was removed under reduced pressure, and the solid residue was dissolved with EtOAc. The insolubles were removed by filtration, and the filtrate was concentrated in vacuo. The residue was purified by silica gel column chromatography (DCM/MeOH = 150:1) to afford **3** (32.6 g, 53%) as a yellowish solid.

$[\alpha]_{\text{D}}^{20} = -93.60$  ( $c = 1.00$  in MeOH); mp: 129-132 °C

$^1\text{H}$  NMR (400 MHz,  $\text{CDCl}_3$ )  $\delta$  7.34-7.23 (m, 5H), 6.49 (s, 1H), 6.47 (s, 1H), 4.47-4.40 (m, 2H), 4.12 (dd,  $J = 8.4, 3.6$  Hz, 1H), 3.83 (dd,  $J = 9.6, 3.6$  Hz, 1H), 3.74 (s, 3H), 3.63 (dd,  $J = 10.0, 5.2$  Hz, 1H), 3.47-3.40 (m, 1H), 2.87-2.74 (m, 2H).

$^{13}\text{C}$  NMR (101 MHz,  $\text{CDCl}_3$ )  $\delta$  173.0, 143.5, 143.3, 137.7, 128.5, 127.8, 125.6, 115.8, 111.7, 73.5, 73.2, 55.7, 55.3, 52.4, 31.6.

IR (film)  $\nu = 3320, 2946, 2832, 1637, 1525, 1452, 1260, 1023, 799 \text{ cm}^{-1}$ .

HRMS (ESI,  $m/z$ ):  $[\text{M} + \text{H}]^+$  calcd for  $\text{C}_{19}\text{H}_{22}\text{NO}_5^+$  344.1492, found 344.1491.

### 2.4 Compound 4

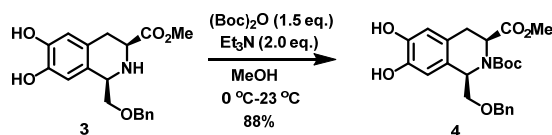

To a solution of **3** (31.8 g, 92.7 mmol, 1.0 equiv.) in MeOH (650 mL) was successively added Et<sub>3</sub>N (25.7 mL, 185.4 mmol, 2.0 equiv.) and (Boc)<sub>2</sub>O (30.3 g, 139.1 mmol, 1.5 equiv.) at 0 °C. The reaction mixture was stirred overnight. Most of MeOH was removed under reduced pressure. The concentrated residue was treated with 1 N aq. HCl to pH < 2, and the mixture was extracted with DCM. The combined extracts were washed with saturated aqueous NaHCO<sub>3</sub> solution and brine, dried (Na<sub>2</sub>SO<sub>4</sub>) and concentrated in vacuo. The residue was purified by silica gel column chromatography (DCM/MeOH = 100:1) to afford **4** (36.2 g, 88%) as a white solid.

$[\alpha]_D^{20} = -20.20$  (c = 2.00 in MeOH), mp: 55-57 °C

<sup>1</sup>H NMR (400 MHz, CDCl<sub>3</sub>) δ 7.33-7.15 (m, 5H), 6.75 (s, 0.2H), 6.71 (s, 0.8H), 6.67 (s, 0.8H), 6.64 (s, 0.2H), 5.22 (dd, *J* = 8.0, 5.2 Hz, 1H), 4.99 (dd, *J* = 8.4, 4.8 Hz, 1H), 4.52-4.43 (m, 2H), 4.43-4.37 (m, 0.2H), 4.24 (t, *J* = 9.2 Hz, 0.8H), 3.77 (dd, *J* = 10.0, 5.6 Hz, 1H), 3.75-3.66 (m, 3H), 3.59 (dd, *J* = 9.6, 8.0 Hz, 1H), 2.93 (s, 1H), 2.90 (s, 1H), 1.46-1.41 (m, 9H).

<sup>13</sup>C NMR (101 MHz, CDCl<sub>3</sub>) δ 173.8 & 173.7, 155.2 & 155.1, 144.0 & 143.5, 142.8 & 142.6, 138.1 & 138.0, 128.4 & 128.3, 128.2 & 127.6, 127.5 & 127.4, 124.2 (overlap), 114.8 & 114.8, 114.6 & 114.2, 81.7 & 81.2, 73.3 & 73.1, 73.1 & 72.7, 56.1 (overlap), 55.3 & 55.0, 52.4 & 52.2, 30.3 & 30.1, 28.4 & 28.3.

IR (film) ν = 3356, 2977, 2952, 1750, 1667, 1455, 1394, 1270, 1160 cm<sup>-1</sup>.

HRMS (ESI, m/z): [M + H]<sup>+</sup> calcd for C<sub>24</sub>H<sub>30</sub>NO<sub>7</sub><sup>+</sup> 444.2017, found 444.2012.

## 2.5 Compound 5

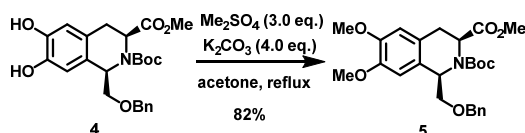

To a solution of **4** (36.0 g, 81.2 mmol, 1.0 equiv.) in acetone (600 mL) was successively added K<sub>2</sub>CO<sub>3</sub> (44.8 g, 324 mmol, 4.0 equiv.) and Me<sub>2</sub>SO<sub>4</sub> (23 mL, 243 mmol, 3.0 equiv.) at room temperature. The reaction mixture was then heated to reflux overnight. After removal of the insolubles by filtration, the filtrate was concentrated in vacuo. The mixture was extracted with DCM. The combined extracts were washed with saturated brine, dried (Na<sub>2</sub>SO<sub>4</sub>) and concentrated in vacuo. The residue was purified by silica gel column chromatography (DCM/MeOH = 50:1) to afford **5** (31.4 g, 82%) as a white solid.

$[\alpha]_D^{20} = -9.70$  (c = 2.00 in MeOH), mp: 30-33 °C

<sup>1</sup>H NMR (400 MHz, CDCl<sub>3</sub>) δ 7.33-7.18 (m, 5H), 6.87 (s, 0.4H), 6.80 (s, 0.6H), 6.68-6.66 (m, 1H), 5.28 (dd, *J* = 8.4, 4.8 Hz, 0.6H), 5.06 (dd, *J* = 8.4, 4.4 Hz, 0.4H), 4.61-4.54 (m, 1H), 4.52-4.45 (m, 1.4H), 4.33-4.28 (m, 0.6H), 3.88-3.83 (m, 1H), 3.87 (s, 3H), 3.82-3.79 (m, 3H), 3.75-3.71 (m, 3H), 3.64-3.55 (m, 1H), 3.06-2.97 (m, 2H), 1.48 (s, 3.6H), 1.42 (s, 5.4H).

<sup>13</sup>C NMR (101 MHz, CDCl<sub>3</sub>) δ 173.7 & 173.2, 154.9 & 154.6, 148.3 & 147.6, 138.6 & 138.3, 128.6 & 128.3, 128.1 & 127.4, 127.8 & 127.5, 127.2 & 127.2, 124.2 & 124.0, 111.5 & 111.1, 110.7 &

110.6, 80.9 & 80.9, 73.7 & 72.8, 73.1 & 72.7, 56.1 (overlap), 56.0 (overlap), 55.7 & 55.2, 54.8 & 54.3, 52.2 & 52.1, 30.6 & 30.3, 28.4 & 28.2.

IR (film)  $\nu$  = 2952, 2864, 1749, 1693, 1513, 1386, 1258, 1161  $\text{cm}^{-1}$ .

HRMS (ESI,  $m/z$ ):  $[M + \text{Na}]^+$  calcd for  $\text{C}_{26}\text{H}_{33}\text{NNaO}_7^+$  494.2149, found 494.2151.

## 2.6 Compound 6

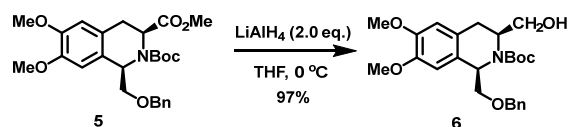

To a suspension of  $\text{LiAlH}_4$  (5.1 g, 133.2 mmol, 2.0 equiv.) in dry THF (500 mL) was added **5** (31.4 g, 66.6 mmol, 1.0 equiv.) in dry THF (100 mL) dropwise under  $\text{N}_2$  atmosphere at  $0\text{ }^\circ\text{C}$ . The mixture was then warmed to room temperature and stirred for 3 h. The reaction was quenched by adding  $\text{H}_2\text{O}$  (5.0 mL) dropwise, followed by aqueous 15%  $\text{NaOH}$  (5.0 mL) and  $\text{H}_2\text{O}$  (15.0 mL). The mixture was warmed to room temperature and stirred overnight. After removal of the insolubles by filtration, the filtrate was concentrated in vacuo. The residue was purified by silica gel column chromatography ( $\text{DCM}/\text{MeOH} = 60:1$ ) to afford **6** (28.7 g, 97%) as a yellow solid.

$[\alpha]_{\text{D}}^{20} = +49.60$  ( $c = 1.00$  in  $\text{MeOH}$ ), mp:  $26\text{--}28\text{ }^\circ\text{C}$

$^1\text{H}$  NMR (400 MHz,  $\text{CDCl}_3$ )  $\delta$  7.35–7.27 (m, 5H), 6.71 (s, 1H), 6.65 (s, 1H), 5.49 (s, 0.5H), 5.21 (s, 0.5H), 4.82–4.20 (m, 3H), 3.86 (s, 3H), 3.80 (s, 3H), 3.73–3.64 (m, 2H), 3.49 (s, 1H), 3.18–3.09 (m, 1H), 3.03–2.74 (m, 2H), 1.47 (s, 9H).

$^{13}\text{C}$  NMR (101 MHz,  $\text{CDCl}_3$ )  $\delta$  155.9, 148.2, 147.4, 137.6, 128.4, 127.8, 127.7, 126.4, 126.1, 125.4, 111.5, 109.9, 80.5, 73.3, 73.0, 72.8, 71.9, 65.4, 64.4, 56.0, 55.9, 54.1, 53.1, 52.8, 51.9, 29.2, 28.4.

IR (film)  $\nu$  = 3468, 2934, 2864, 1683, 1514, 1454, 1391, 1254, 1164, 729  $\text{cm}^{-1}$ .

HRMS (ESI,  $m/z$ ):  $[M + \text{Na}]^+$  calcd for  $\text{C}_{25}\text{H}_{33}\text{NNaO}_6^+$  466.2200, found 466.2200.

## 2.7 Compound 7

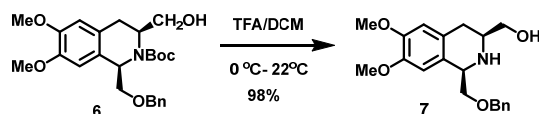

To a solution of **6** (28.7 g, 64.7 mmol, 1.0 equiv.) in DCM (400 mL) was added TFA (40 mL) dropwise at  $0\text{ }^\circ\text{C}$ . The reaction was warmed to room temperature and stirred overnight. The solvents and volatiles were removed under reduced pressure. The resulting mixture was neutralized by adding saturated aqueous  $\text{NaHCO}_3$  solution, and then extracted with DCM. The combined extracts were washed with saturated brine, dried ( $\text{Na}_2\text{SO}_4$ ) and concentrated in vacuo. The residue was purified by silica gel column chromatography ( $\text{DCM}/\text{MeOH} = 50:1$ ) to afford **7** (21.7 g, 98%) as a yellowish solid.

$[\alpha]_{\text{D}}^{20} = -52.00$  ( $c = 0.50$  in  $\text{MeOH}$ ), mp:  $118\text{--}121\text{ }^\circ\text{C}$

$^1\text{H}$  NMR (400 MHz,  $\text{CDCl}_3$ )  $\delta$  7.36–7.26 (m, 5H), 6.65 (s, 1H), 6.58 (s, 1H), 4.60 (d,  $J = 12.0$  Hz, 1H), 4.55 (d,  $J = 12.0$  Hz, 1H), 4.23–4.18 (m, 1H), 3.93 (dd,  $J = 9.2, 3.6$  Hz, 1H), 3.84 (s, 3H), 3.78 (s, 3H), 3.79 (dd,  $J = 10.8, 4.0$  Hz, 1H), 3.71 (dd,  $J = 9.2, 6.4$  Hz, 1H), 3.56 (dd,  $J = 11.2, 7.6$  Hz, 1H), 3.11–3.03 (m, 1H), 2.83 (s, 3H), 2.64 (dd,  $J = 15.6, 10.4$  Hz, 1H), 2.54 (dd,  $J = 15.6, 4.0$  Hz,

1H).

<sup>13</sup>C NMR (101 MHz, CDCl<sub>3</sub>) δ 147.7, 147.4, 138.0, 128.4, 127.9, 127.8, 127.3, 127.3, 112.0, 108.2, 73.9, 73.4, 65.9, 56.0, 56.0, 55.8, 54.6, 31.5.

IR (film) ν = 3319, 2930, 2857, 1515, 1453, 1218, 1094 cm<sup>-1</sup>.

HRMS (ESI, m/z): [M + H]<sup>+</sup> calcd for C<sub>20</sub>H<sub>26</sub>NO<sub>4</sub><sup>+</sup> 344.1856, found 344.1864.

## 2.8 Compound 9

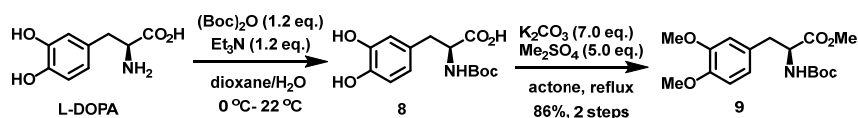

To a solution of L-DOPA (50.0 g, 253.0 mmol, 1.0 equiv.) in dioxane/H<sub>2</sub>O (1:1, 1200 mL) was successively added Et<sub>3</sub>N (42.0 mL, 303.6 mmol, 1.2 equiv.) and (Boc)<sub>2</sub>O (66.3 g, 303.6 mmol, 1.2 equiv.) at 0 °C. The reaction was stirred at room temperature overnight. The solvent was removed under reduced pressure, and H<sub>2</sub>O (50 mL) and EtOAc (200 mL) were added. The aqueous phase was acidified with 1 N aq. HCl to pH < 2, and then extracted with EtOAc. The combined extracts were washed with brine, dried (Na<sub>2</sub>SO<sub>4</sub>) and concentrated in vacuo. The resulting crude **8** was used for the next step without further purification.

To a solution of above crude **8** (36.0 g, 120.0 mmol, 1.0 equiv.) in acetone (700 mL) was successively added K<sub>2</sub>CO<sub>3</sub> (116.1 g, 840.0 mmol, 7.0 equiv.) and Me<sub>2</sub>SO<sub>4</sub> (56.9 mL, 600.0 mmol, 5.0 equiv.) at room temperature. The reaction was then heated to reflux overnight. After removal of the insolubles by filtration, the filtrate was concentrated in vacuo. The residue was treated with H<sub>2</sub>O and extracted with DCM. The combined extracts were washed with saturated brine, dried (Na<sub>2</sub>SO<sub>4</sub>) and concentrated in vacuo. The residue was purified by silica gel column chromatography (petroleum ether/EtOAc = 15:1) to afford **9** (35 g, 86%) as a white solid.

Spectral data is consistent with the literature.<sup>[3]</sup> <sup>1</sup>H NMR (400 MHz, CDCl<sub>3</sub>) δ 6.76 (d, *J* = 8.0 Hz, 1H), 6.65–6.60 (m, 2H), 4.98 (d, *J* = 8.4 Hz, 1H), 4.56–4.70 (m, 1H), 3.82 (s, 3H), 3.82 (s, 3H), 3.68 (s, 3H), 3.06–2.93 (m, 2H), 1.39 (s, 9H).

## 2.9 Compound 10

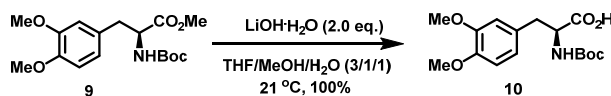

To a solution of **9** (34.0 g, 100.3 mmol, 1.0 equiv.) in THF/MeOH/H<sub>2</sub>O (3:1:1, 500 mL) was added LiOH·H<sub>2</sub>O (8.4 g, 200.6 mmol, 2.0 equiv.) at 0 °C. The reaction was stirred at room temperature overnight. The solvent was removed under reduced pressure, and the residue was distributed between H<sub>2</sub>O and DCM. The aqueous phase was acidified with 1 N aq. HCl to pH < 2, and extracted with DCM. The combined extracts were washed with brine, dried (Na<sub>2</sub>SO<sub>4</sub>) and concentrated in vacuo to afford **10** (29.5 g, 100%) as a white solid.

Spectral data is consistent with the literature.<sup>[4]</sup> <sup>1</sup>H NMR (400 MHz, CDCl<sub>3</sub>) δ 6.78 (d, *J* = 8.0 Hz, 1H), 6.74–6.68 (m, 2H), 6.16 (s, 0.3H), 5.01 (s, 0.7H), 4.53 (s, 0.7H), 4.34 (s, 0.3H), 3.84 (s, 6H), 3.17–3.06 (m, 1H), 3.05–2.94 (m, 1H), 1.44–1.24 (m, 9H).

## 2.10 Compound 11

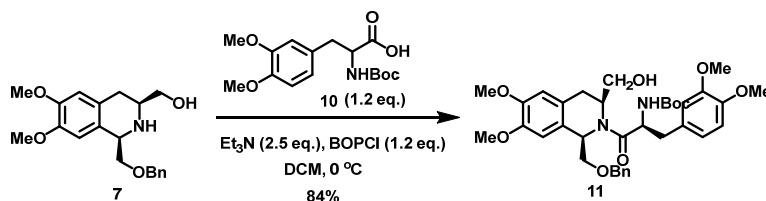

To a mixture of **7** (18.5 g, 54.0 mmol, 1.0 equiv.), **10** (21.1 g, 64.8 mmol, 1.2 equiv.) and BOPCl (16.5 g, 64.8 mmol, 1.2 equiv.) in DCM (500 mL) was added Et<sub>3</sub>N (18.7 mL, 135.0 mmol, 2.5 equiv.) dropwise at 0 °C. The reaction was stirred at 0 °C overnight, until it was quenched with saturated aqueous NH<sub>4</sub>Cl solution. The combined extracts were washed with saturated brine, dried (Na<sub>2</sub>SO<sub>4</sub>) and concentrated in vacuo. The residue was purified by silica gel column chromatography (DCM/MeOH = 100:1) to afford **11** (29.4 g, 84%) as a white solid.

$[\alpha]_D^{20} = +34.20$  ( $c = 2.00$  in MeOH), mp: 62–64 °C

<sup>1</sup>H NMR (400 MHz, CDCl<sub>3</sub>)  $\delta$  7.34–7.21 (m, 5H), 6.88 (s, 0.7H), 6.75–6.70 (m, 1.3H), 6.69–6.63 (m, 1.6H), 6.60 (d,  $J = 8.0$  Hz, 0.7H), 6.40 (s, 0.7H), 5.60–5.53 (m, 1H), 5.42 (d,  $J = 8.4$  Hz, 0.7H), 5.20–5.12 (m, 0.3H), 5.07–4.96 (m, 1H), 4.60 (s, 1.3H), 4.53–4.43 (m, 0.3H), 4.42 (s, 0.7H), 4.12–4.04 (m, 0.7H), 3.87–3.74 (m, 9H), 3.72 (s, 3H), 3.57–3.33 (m, 3H), 3.13–2.88 (m, 3H), 2.83 (dd,  $J = 16.0$ , 7.2 Hz, 0.3H), 2.32 (d,  $J = 16.2$  Hz, 0.7H), 1.99 (dd,  $J = 16.4$ , 6.4 Hz, 0.7H), 1.81–1.72 (m, 0.3H), 1.46–1.32 (m, 9H).

<sup>13</sup>C NMR (101 MHz, CDCl<sub>3</sub>)  $\delta$  173.7 & 172.7, 155.9 & 154.9, 149.0 & 148.8, 148.7 & 148.0, 147.9 & 147.8, 147.6 & 147.6, 138.0 & 137.1, 129.7 & 128.5, 128.3 (overlap), 128.0 & 127.9, 127.7 & 127.6, 126.2 & 125.3, 126.1 & 123.0, 121.6 & 121.5, 112.9 & 112.4, 111.4 & 111.2, 111.1 & 110.9, 110.3 & 109.5, 80.4 & 79.8, 73.3 & 73.3, 73.0 & 71.9, 65.1 & 64.2, 56.6 & 54.0, 56.0 (overlap), 55.9 (overlap), 55.8 (overlap), 55.8 (overlap), 53.1 & 52.1, 52.0 & 51.7, 39.3 & 39.0, 29.3 & 29.1, 28.3 & 28.3.

IR (film)  $\nu = 3429, 2934, 1701, 1631, 1515, 1441, 1264, 1160, 733$  cm<sup>-1</sup>.

HRMS (ESI,  $m/z$ ):  $[M + Na]^+$  calcd for C<sub>36</sub>H<sub>46</sub>N<sub>2</sub>NaO<sub>9</sub><sup>+</sup> 673.3096, found 673.3099.

## 2.11 Compounds 14, 12 and 13

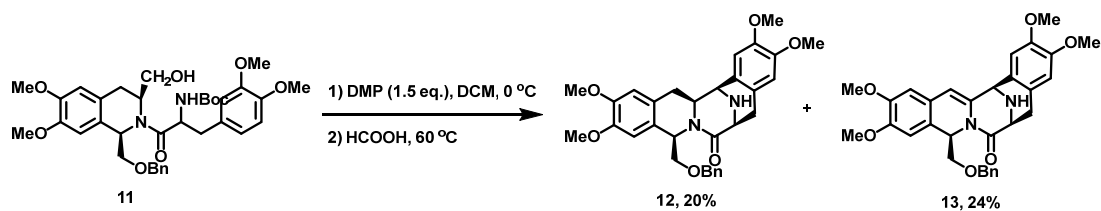

To a solution of compound **11** (5.72 g, 8.8 mmol, 1.0 equiv.) in DCM (80 mL) was added Dess-Martin periodinane (5.6 g, 13.2 mmol, 1.5 equiv.) at 0 °C. The reaction was allowed to warm to room temperature and stirred for 1 h. The whole mixture was filtered through a short pad of silica gel and washed with DCM. The combined filtrate and washings were concentrated in vacuo. The residue (containing crude **14**) was used directly in the next step without further purification.

- The intermediate **14** involved in this two-step transformation was also isolated and characterized.

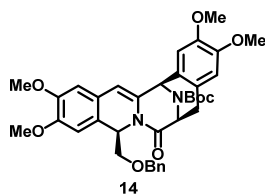

**14:**  $[\alpha]_D^{20} = +82.80$  ( $c = 1.00$  in MeOH), mp: 90-94 °C

$^1\text{H}$  NMR (400 MHz,  $\text{CDCl}_3$ )  $\delta$  7.27-7.22 (m, 2H), 7.21-7.16 (m, 1H), 7.06-7.02 (m, 2H), 6.70 (s, 1H), 6.67 (s, 1H), 6.65 (s, 1H), 6.36-6.28 (m, 1H), 5.99 (s, 0.7H), 5.90 (s, 0.3H), 5.80 (t,  $J = 7.2$  Hz, 1H), 5.65 (s, 0.7H), 5.44 (s, 0.3H), 5.17 (s, 0.3H), 5.08-5.02 (m, 0.7H), 3.94-3.88 (m, 1H), 3.88 (s, 3H), 3.82 (s, 3H), 3.80 (s, 3H), 3.82-3.77 (m, 1H), 3.60 (s, 3H), 3.29-3.19 (m, 1H), 3.13-2.97 (m, 3H), 1.45 (s, 9H).

$^{13}\text{C}$  NMR (101 MHz,  $\text{CDCl}_3$ )  $\delta$  167.0, 152.3, 148.8, 148.3, 147.8, 138.4, 133.7, 128.0, 128.0, 127.0, 126.6, 125.7, 124.3, 123.1, 122.0, 111.5, 110.6, 109.3, 108.6, 105.0, 104.2, 81.2, 72.5, 70.8, 56.1, 56.0, 55.7, 54.7, 53.3, 52.7, 52.1, 32.8, 28.4.

IR (film)  $\nu = 2933, 2854, 1697, 1515, 1453, 1367, 1250, 1163 \text{ cm}^{-1}$ .

HRMS (ESI,  $m/z$ ):  $[\text{M} + \text{Na}]^+$  calcd for  $\text{C}_{36}\text{H}_{40}\text{N}_2\text{NaO}_8^+$  651.2677, found 651.2663.

The above residue was dissolved in HCOOH (40 mL) and stirred at 60 °C for 30 mins. Most of HCOOH was removed under reduced pressure, and the resulting residue was neutralized with saturated aqueous  $\text{NaHCO}_3$  solution and extracted with DCM. The combined extracts were washed with saturated brine, dried ( $\text{Na}_2\text{SO}_4$ ) and concentrated in vacuo. The residue was purified by silica gel column chromatography (DCM/MeOH = 100:1) to afford **12** (0.9 g, 20%) as a yellow solid, along with **13** (1.1 g, 24%) as a yellow solid.

Characterizations of **12**:

$[\alpha]_D^{20} = -65.50$  ( $c = 0.40$  in MeOH), mp: 86-90 °C

$^1\text{H}$  NMR (400 MHz,  $\text{CDCl}_3$ )  $\delta$  7.23-7.14 (m, 3H), 6.94-6.90 (m, 2H), 6.70 (s, 1H), 6.68 (s, 1H), 6.63 (s, 1H), 6.54 (s, 1H), 5.29 (dd,  $J = 6.0, 3.2$  Hz, 1H), 4.11-4.07 (m, 2H), 4.04-3.98 (m, 2H), 3.95 (td,  $J = 7.2, 3.2$  Hz, 1H), 3.88 (s, 3H), 3.83 (s, 3H), 3.82 (s, 3H), 3.79 (s, 3H), 3.45 (dd,  $J = 9.6, 3.6$  Hz, 1H), 3.23-3.15 (m, 2H), 3.05 (d,  $J = 16.8$  Hz, 1H), 2.73 (d,  $J = 7.6$  Hz, 2H).

$^{13}\text{C}$  NMR (101 MHz,  $\text{CDCl}_3$ )  $\delta$  170.3, 148.8, 148.0, 147.6, 146.9, 138.5, 128.0, 127.9, 127.1, 126.9, 126.6, 126.4, 124.5, 111.7, 111.4, 111.3, 110.6, 72.8, 72.8, 61.2, 56.1, 56.0, 56.0, 55.9, 55.1, 54.6, 54.3, 34.2, 33.1.

IR (film)  $\nu = 3303, 2935, 2834, 1638, 1515, 1453, 1264, 1125 \text{ cm}^{-1}$ .

HRMS (ESI,  $m/z$ ):  $[\text{M} + \text{Na}]^+$  calcd for  $\text{C}_{31}\text{H}_{34}\text{N}_2\text{NaO}_6^+$  553.2309, found 553.2309.

Characterizations of **13**:

$[\alpha]_D^{20} = -25.50$  ( $c = 0.40$  in MeOH), mp: 86-90 °C

$^1\text{H}$  NMR (400 MHz,  $\text{CDCl}_3$ )  $\delta$  7.29-7.21 (m, 2H), 7.21-7.16 (m, 1H), 7.06-7.03 (m, 2H), 6.66 (s, 2H), 6.64 (s, 1H), 6.36 (s, 1H), 5.86-5.80 (m, 2H), 4.53 (s, 1H), 4.11-4.08 (m, 1H), 3.92 (d,  $J = 12.0$  Hz, 1H), 3.88 (s, 3H), 3.88-3.84 (m, 1H), 3.82 (s, 3H), 3.80 (s, 3H), 3.63 (s, 3H), 3.26 (dd,  $J = 16.4, 6.0$  Hz, 1H), 3.10 (dd,  $J = 10.0, 5.6$  Hz, 1H), 3.07-3.04 (m, 1H), 3.03-2.99 (m, 1H).

$^{13}\text{C}$  NMR (101 MHz,  $\text{CDCl}_3$ )  $\delta$  168.8, 148.7, 148.6, 148.0, 147.6, 138.5, 137.1, 128.0, 127.0, 126.6, 126.5, 124.9, 123.3, 122.2, 111.6, 110.7, 109.6, 108.3, 102.9, 72.6, 70.8, 56.1, 56.0, 55.6, 54.8, 54.7, 51.6, 33.8.



IR (film)  $\nu$  = 3306, 2936, 2834, 1639, 1513, 1464, 1358, 1263, 1123  $\text{cm}^{-1}$ .  
 HRMS (ESI,  $m/z$ ):  $[M + Na]^+$  calcd for  $\text{C}_{31}\text{H}_{32}\text{N}_2\text{NaO}_6^+$  551.2153, found 551.2153.

## 2.12 Compound 15

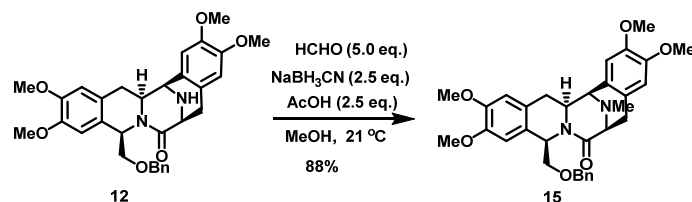

To a solution of compound **12** (440 mg, 0.8 mmol, 1.0 equiv.) in MeOH (5 mL) was added HCHO (37% in  $\text{H}_2\text{O}$ , 329 mg, 4.0 mmol, 5.0 equiv.),  $\text{NaBH}_3\text{CN}$  (126 mg, 2.0 mmol, 2.5 equiv.), and acetic acid (114  $\mu\text{L}$ , 2.0 mmol, 2.5 equiv.). The reaction was stirred at room temperature for 1 h, until it was quenched with  $\text{H}_2\text{O}$ . The whole mixture was concentrated under reduced pressure. The residue was distributed with DCM and washed with saturated brine, dried ( $\text{Na}_2\text{SO}_4$ ) and concentrated in vacuo. The residue was purified by silica gel column chromatography (DCM/MeOH = 50:1) to afford **15** (385 mg, 88%) as a yellow solid.

$[\alpha]_{\text{D}}^{20} = -68.00$  ( $c = 1.00$  in MeOH), mp: 77-79  $^\circ\text{C}$

$^1\text{H}$  NMR (400 MHz,  $\text{CDCl}_3$ )  $\delta$  7.22-7.13 (m, 3H), 6.93-6.88 (m, 2H), 6.68 (s, 1H), 6.68 (s, 1H), 6.62 (s, 1H), 6.54 (s, 1H), 5.27 (dd,  $J = 6.4, 3.2$  Hz, 1H), 4.10 (d,  $J = 12.4$  Hz, 1H), 4.01 (d,  $J = 11.6$  Hz, 1H), 4.04-3.98 (m, 1H), 3.87 (s, 3H), 3.83 (s, 3H), 3.82 (s, 3H), 3.78 (s, 3H), 3.76-3.73 (m, 1H), 3.70 (dt,  $J = 6.4, 1.2$  Hz, 1H), 3.45 (dd,  $J = 9.6, 3.2$  Hz, 1H), 3.26 (dd,  $J = 17.2, 6.8$  Hz, 1H), 3.21 (dd,  $J = 9.6, 6.4$  Hz, 1H), 2.84 (d,  $J = 17.2$  Hz, 1H), 2.73-2.61 (m, 2H), 2.47 (s, 3H).

$^{13}\text{C}$  NMR (101 MHz,  $\text{CDCl}_3$ )  $\delta$  170.8, 148.7, 147.9, 147.6, 147.0, 138.5, 128.2, 128.0, 127.1, 126.8, 126.6, 125.7, 122.5, 112.1, 111.4, 111.3, 110.6, 72.8, 72.8, 60.9, 60.3, 57.7, 56.1, 56.0, 55.9, 55.8, 55.1, 40.0, 32.9, 28.4.

IR (film)  $\nu$  = 2934, 2834, 1640, 1514, 1464, 1359, 1256, 1113, 731  $\text{cm}^{-1}$ .

HRMS (ESI,  $m/z$ ):  $[M + Na]^+$  calcd for  $\text{C}_{32}\text{H}_{36}\text{N}_2\text{NaO}_6^+$  567.2466, found 567.2468.

## 2.13 Compound 16

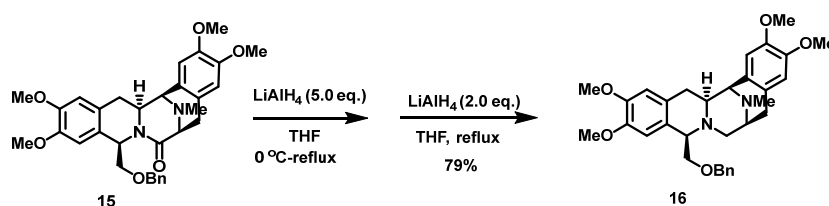

To a stirred suspension of  $\text{LiAlH}_4$  (114 mg, 3.0 mmol, 5.0 equiv.) in anhydrous THF (10 mL) was added **15** (326 mg, 0.6 mmol, 1.0 equiv.) in anhydrous THF (5 mL) dropwise at 0  $^\circ\text{C}$  under  $\text{N}_2$ . The reaction was then heated to reflux for 1 h, until it was quenched with  $\text{H}_2\text{O}$  (0.1 mL) dropwise, followed by adding aqueous 15% NaOH (0.1 mL) and  $\text{H}_2\text{O}$  (0.3 mL). After filtration, the filtrate was concentrated in vacuo to give the crude intermediate (the semi-*N,O*-aminal).

To a stirred suspension of  $\text{LiAlH}_4$  (46 mg, 1.2 mmol, 2.0 equiv.) in anhydrous THF (10 mL) was added the above crude intermediate in anhydrous THF (5 mL) dropwise at 0  $^\circ\text{C}$  under  $\text{N}_2$ . The reaction mixture was heated to reflux overnight, until it was quenched with  $\text{H}_2\text{O}$  (0.05 mL) dropwise,

followed by adding aqueous 15% NaOH (0.05 mL) and H<sub>2</sub>O (0.15 mL). The mixture was warmed to room temperature and stirred overnight. After removal of the insolubles by filtration, the filtrate was concentrated in vacuo. The residue was purified by silica gel column chromatography (DCM/MeOH = 80:1) to afford **16** (221 mg, 79%) as a yellow solid.

$[\alpha]_D^{20} = +26.80$  ( $c = 1.00$  in MeOH), mp: 61-64 °C

<sup>1</sup>H NMR (400 MHz, CDCl<sub>3</sub>)  $\delta$  7.32-7.22 (m, 3H), 7.21-7.17 (m, 2H), 6.68 (s, 1H), 6.58 (s, 1H), 6.56 (s, 1H), 6.50 (s, 1H), 4.38 (d,  $J = 12.0$  Hz, 1H), 4.32 (d,  $J = 12.0$  Hz, 1H), 3.89 (s, 3H), 3.84 (s, 6H), 3.74 (s, 3H), 3.58-3.52 (m, 2H), 3.37 (dd,  $J = 9.6, 5.2$  Hz, 1H), 3.24 (dd,  $J = 9.6, 5.6$  Hz, 1H), 3.21-3.14 (m, 2H), 3.05 (dd,  $J = 17.2, 7.6$  Hz, 1H), 3.01-2.92 (m, 2H), 2.62 (d,  $J = 16.8$  Hz, 1H), 2.48 (dd,  $J = 14.8, 2.8$  Hz, 1H), 2.36 (dd,  $J = 14.4, 11.6$  Hz, 1H), 2.35 (s, 3H).

<sup>13</sup>C NMR (101 MHz, CDCl<sub>3</sub>)  $\delta$  147.9, 147.3, 147.1, 146.1, 138.7, 128.3, 128.2, 127.4, 127.3, 127.3, 124.4, 112.6, 110.6, 110.5, 77.1, 76.7, 73.3, 64.0, 63.3, 61.6, 60.1, 56.2, 55.9, 55.8, 53.8, 41.2, 33.3, 27.3.

IR (film)  $\nu = 2931, 2832, 1514, 1464, 1247, 1115, 1002$  cm<sup>-1</sup>.

HRMS (ESI,  $m/z$ ):  $[M + Na]^+$  calcd for C<sub>32</sub>H<sub>39</sub>N<sub>2</sub>O<sub>5</sub><sup>+</sup> 531.2853, found 531.2857.

## 2.14 Compound 17

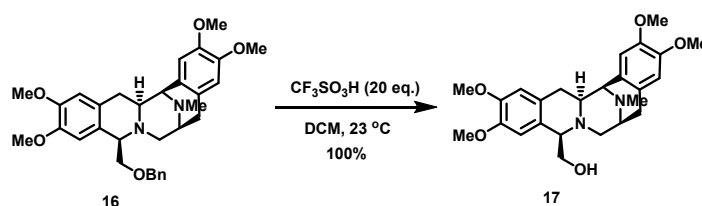

To a solution of **16** (35.4 mg, 0.067 mmol, 1.0 equiv.) in DCM (5 mL) was added CF<sub>3</sub>SO<sub>3</sub>H (118  $\mu$ L, 1.3 mmol, 20.0 equiv.) dropwise at room temperature. The mixture was stirred for 1 h, until the solvent was removed under reduced pressure. The residual mixture was neutralized with saturated aqueous NaHCO<sub>3</sub> solution, and then extracted with DCM. The combined extracts were washed with saturated brine, dried (Na<sub>2</sub>SO<sub>4</sub>) and concentrated in vacuo. The residue was purified by silica gel column chromatography (DCM/MeOH = 50:1) to afford **17** (29.5 mg, 100%) as a white solid.

$[\alpha]_D^{20} = +42.40$  ( $c = 0.50$  in MeOH), mp: 92-96 °C

<sup>1</sup>H NMR (400 MHz, CDCl<sub>3</sub>)  $\delta$  6.62 (s, 1H), 6.55 (s, 1H), 6.51 (s, 1H), 6.50 (s, 1H), 3.88 (s, 3H), 3.84 (s, 3H), 3.83 (s, 3H), 3.81 (s, 3H), 3.82-3.78 (m, 1H), 3.57 (dd,  $J = 2.8, 1.2$  Hz, 1H), 3.52 (t,  $J = 2.8$  Hz, 1H), 3.36 (d,  $J = 10.4$  Hz, 1H), 3.20-3.12 (m, 2H), 3.12-3.00 (m, 2H), 2.97 (dd,  $J = 10.8, 2.8$  Hz, 1H), 2.56 (d,  $J = 16.8$  Hz, 1H), 2.49 (dd,  $J = 14.8, 3.2$  Hz, 1H), 2.42 (dd,  $J = 15.2, 11.2$  Hz, 1H), 2.37 (s, 3H).

<sup>13</sup>C NMR (101 MHz, CDCl<sub>3</sub>)  $\delta$  148.2, 147.7, 147.6, 146.4, 127.6, 127.6, 126.8, 124.4, 112.8, 110.7, 110.6, 109.5, 65.2, 63.8, 63.8, 60.5, 59.4, 56.2, 56.0, 55.9, 55.9, 53.4, 41.5, 32.9, 27.1.

IR (film)  $\nu = 3365, 2928, 2835, 1516, 1464, 1257, 1115, 1041$  cm<sup>-1</sup>.

HRMS (ESI,  $m/z$ ):  $[M + Na]^+$  calcd for C<sub>25</sub>H<sub>33</sub>N<sub>2</sub>O<sub>5</sub><sup>+</sup> 441.2384, found 441.2389.

## 2.15 Compound 18

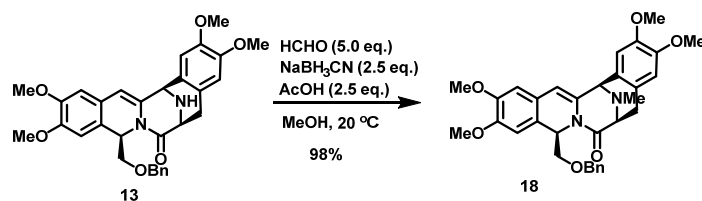

To a solution of **13** (4.7 g, 8.9 mmol, 1.0 equiv.) in MeOH (100 mL) was added HCHO (3.6 g, 44.5 mmol, 5.0 equiv.), NaBH<sub>3</sub>CN (1.4 g, 22.3 mmol, 2.5 equiv.), and acetic acid (1.3 mL, 22.3 mmol, 2.5 equiv.) at room temperature. The reaction was stirred at room temperature for 1 h, until it was quenched with H<sub>2</sub>O. The whole mixture was concentrated under reduced pressure. The resulting mixture was diluted with DCM, and washed with saturated brine, dried (Na<sub>2</sub>SO<sub>4</sub>) and concentrated in vacuo. The residue was purified by silica gel column chromatography (DCM/MeOH = 80:1) to afford **18** (4.73 g, 98%) as a white solid.

$[\alpha]_D^{20} = -31.60$  ( $c = 0.50$  in MeOH), mp: 81-85 °C

<sup>1</sup>H NMR (400 MHz, CDCl<sub>3</sub>)  $\delta$  7.28-7.22 (m, 2H), 7.22-7.16 (m, 1H), 7.07-7.03 (m, 2H), 6.66 (s, 1H), 6.66 (s, 1H), 6.65 (s, 1H), 6.34 (s, 1H), 5.90 (s, 1H), 5.87 (dd,  $J = 8.0, 5.6$  Hz, 1H), 4.18 (s, 1H), 3.91 (d,  $J = 12.4$  Hz, 1H), 3.89 (s, 3H), 3.82 (s, 3H), 3.80 (s, 3H), 3.83-3.79 (m, 1H), 3.69 (dt,  $J = 6.4, 1.6$  Hz, 1H), 3.61 (s, 3H), 3.33 (dd,  $J = 16.4, 6.4$  Hz, 1H), 3.10 (dd,  $J = 9.6, 5.2$  Hz, 1H), 3.04-2.98 (m, 2H), 2.54 (s, 3H).

<sup>13</sup>C NMR (101 MHz, CDCl<sub>3</sub>)  $\delta$  168.1, 148.7, 148.6, 148.0, 147.5, 138.5, 133.8, 128.0, 127.0, 126.7, 126.6, 124.5, 122.9, 122.3, 111.2, 110.7, 109.6, 108.3, 105.9, 72.6, 71.0, 61.8, 61.4, 56.1, 56.0, 55.6, 51.4, 41.8, 33.5.

IR (film)  $\nu = 2936, 2835, 1640, 1513, 1464, 1358, 1252, 1192, 1005$  cm<sup>-1</sup>.

HRMS (ESI,  $m/z$ ):  $[M + Na]^+ C_{32}H_{34}N_2NaO_6^+ 565.2309$ , found 565.2311.

## 2.16 Compound 19

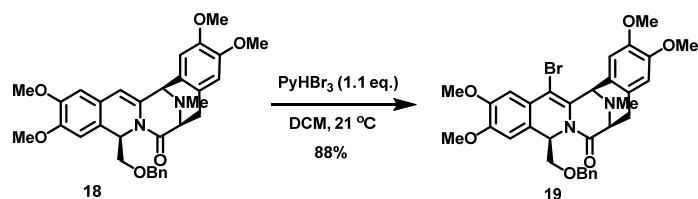

To a solution of **18** (3.3 g, 6.0 mmol, 1.0 equiv.) in DCM (50 mL) was added pyridinium tribromide (2.1 g, 6.6 mmol, 1.1 equiv.) at room temperature. The reaction was stirred at room temperature for 1 h, until it was quenched with H<sub>2</sub>O. The whole mixture was extracted with DCM. The combined extracts were washed with saturated brine, dried (Na<sub>2</sub>SO<sub>4</sub>) and concentrated in vacuo. The residue was purified by silica gel column chromatography (DCM/MeOH = 100:1) to afford **19** (3.3 g, 88%) as a yellowish solid.

$[\alpha]_D^{20} = +98.20$  ( $c = 1.00$  in MeOH), mp: 72-74 °C

<sup>1</sup>H NMR (400 MHz, CDCl<sub>3</sub>)  $\delta$  7.28-7.23 (m, 2H), 7.22-7.17 (m, 1H), 7.14 (s, 1H), 7.06-7.03 (m, 2H), 7.02 (s, 1H), 6.65 (s, 1H), 6.33 (s, 1H), 5.91 (dd,  $J = 7.6, 5.2$  Hz, 1H), 5.22 (s, 1H), 3.95 (s, 3H), 3.89 (d,  $J = 12.0$  Hz, 1H), 3.82 (s, 3H), 3.81 (s, 3H), 3.77-3.81 (m, 1H), 3.66 (dt,  $J = 6.0, 1.2$  Hz, 1H), 3.59 (s, 3H), 3.31 (dd,  $J = 16.4, 6.4$  Hz, 1H), 3.08 (dd,  $J = 10.0, 5.6$  Hz, 1H), 3.01-2.95 (m, 2H), 2.55 (s, 3H).

$^{13}\text{C}$  NMR (101 MHz,  $\text{CDCl}_3$ )  $\delta$  167.7, 148.9, 148.8, 148.6, 147.7, 138.3, 132.4, 128.0, 127.1, 126.6, 126.5, 124.4, 122.8, 122.6, 111.3, 110.1, 109.4, 108.9, 103.3, 72.5, 70.9, 60.6, 59.6, 56.1, 56.0, 55.6, 51.1, 41.7, 33.2.

IR (film)  $\nu$  = 2936, 2855, 1670, 1511, 1464, 1377, 1264, 1131, 1006  $\text{cm}^{-1}$ .

HRMS (ESI,  $m/z$ ):  $[\text{M} + \text{Na}]^+ \text{C}_{32}\text{H}_{33}\text{BrN}_2\text{NaO}_6^+$  643.1414, found 643.1409.

## 2.17 Compound 20

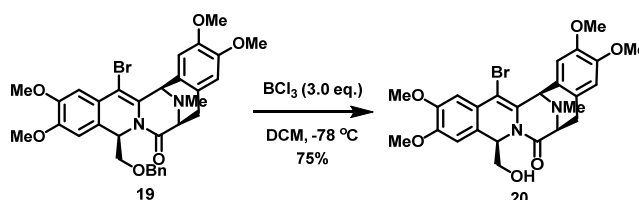

To a solution of **19** (3.2 g, 5.2 mmol, 1.0 equiv.) in DCM (50 mL) was added  $\text{BCl}_3$  (1.0 M in toluene, 15.6 mL, 15.6 mmol, 3.0 equiv.) dropwise at  $-78^\circ\text{C}$  under  $\text{N}_2$ . The reaction was stirred at  $-78^\circ\text{C}$  for 3 h, until it was quenched by adding saturated aqueous  $\text{NaHCO}_3$  solution. The whole mixture was extracted with DCM. The combined extracts were washed with saturated brine, dried ( $\text{Na}_2\text{SO}_4$ ) and concentrated in vacuo. The residue was purified by silica gel column chromatography (DCM/MeOH = 80:1) to afford **20** (2.1 g, 75%) as a white solid.

$[\alpha]_{\text{D}}^{20} = +167.00$  ( $c = 0.40$  in MeOH), mp: 101-105  $^\circ\text{C}$

$^1\text{H}$  NMR (400 MHz,  $\text{CDCl}_3$ )  $\delta$  7.14 (s, 1H), 7.04 (s, 1H), 6.66 (s, 1H), 6.64 (s, 1H), 5.72 (dd,  $J = 7.6, 5.2$  Hz, 1H), 5.24 (s, 1H), 3.94 (s, 3H), 3.88 (s, 3H), 3.85 (s, 3H), 3.84 (s, 3H), 3.67 (dt,  $J = 6.0, 1.6$  Hz, 1H), 3.35 (dd,  $J = 16.4, 6.0$  Hz, 1H), 3.22-3.14 (m, 1H), 3.10-3.04 (m, 1H), 3.04-2.97 (m, 2H), 2.55 (s, 3H), 0.82 (t,  $J = 6.8$  Hz, 1H).

$^{13}\text{C}$  NMR (101 MHz,  $\text{CDCl}_3$ )  $\delta$  168.3, 149.1, 149.0, 148.9, 148.1, 132.1, 126.5, 124.2, 122.6, 122.4, 111.2, 109.9, 109.7, 108.8, 103.5, 64.0, 60.7, 59.6, 56.2, 56.1, 56.0, 55.8, 53.0, 41.7, 33.6.

IR (film)  $\nu$  = 3521, 2937, 2834, 1667, 1611, 1512, 1464, 1379, 1250, 1132  $\text{cm}^{-1}$ .

HRMS (ESI,  $m/z$ ):  $[\text{M} + \text{H}]^+ \text{C}_{25}\text{H}_{28}\text{BrN}_2\text{O}_6^+$  531.1125, found 531.1119.

## 2.18 General procedure for the synthesis of 21a~21l

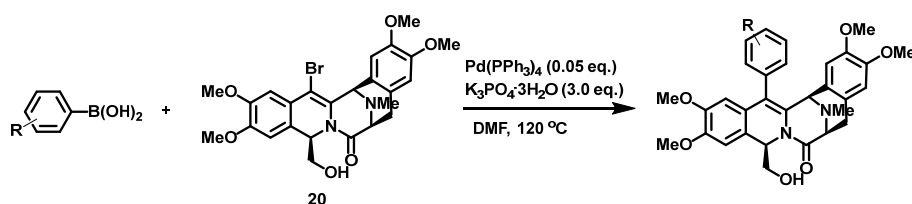

A mixture of vinyl bromide **20** (37.1 mg, 0.07 mmol, 1.0 equiv.), the corresponding arylboronic acid (0.168 mmol, 2.4 equiv.),  $\text{Pd}(\text{PPh}_3)_4$  (4.0 mg, 0.0035 mmol, 0.05 equiv.),  $\text{K}_3\text{PO}_4 \cdot 3\text{H}_2\text{O}$  (56.0 mg, 0.21 mmol, 3.0 equiv.) in DMF (2 mL) was stirred at 120  $^\circ\text{C}$  under  $\text{N}_2$  overnight. The reaction was quenched with  $\text{H}_2\text{O}$ . The whole mixture was extracted with DCM. The combined extracts were washed with saturated brine, dried ( $\text{Na}_2\text{SO}_4$ ) and concentrated in vacuo. The residue was purified by silica gel column chromatography to afford **21a~21l**.

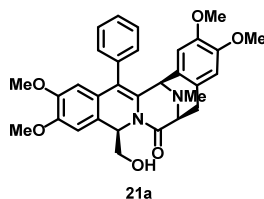

**21a:** white solid, 99% yield. Flash column chromatography (petroleum ether/acetone = 1:1).

$[\alpha]_D^{20} = +93.00$  ( $c = 0.40$  in MeOH), mp: 119-121 °C

$^1\text{H}$  NMR (400 MHz,  $\text{CDCl}_3$ )  $\delta$  7.61-7.56 (m, 1H), 7.55-7.47 (m, 2H), 7.47-7.43 (m, 1H), 7.37-7.33 (m, 1H), 6.72 (s, 1H), 6.59 (s, 1H), 6.29 (s, 1H), 6.11 (s, 1H), 5.81 (dd,  $J = 7.6, 5.2$  Hz, 1H), 4.47 (s, 1H), 3.87 (s, 3H), 3.82 (s, 3H), 3.71 (s, 3H), 3.71-3.67 (m, 1H), 3.58 (s, 3H), 3.35-3.27 (m, 2H), 3.26-3.18 (m, 1H), 3.02 (d,  $J = 15.6$  Hz, 1H), 2.65 (s, 3H), 1.01 (t,  $J = 6.8$  Hz, 1H).

$^{13}\text{C}$  NMR (101 MHz,  $\text{CDCl}_3$ )  $\delta$  169.2, 148.6, 148.5, 147.7, 136.4, 131.3, 130.7, 130.0, 129.4, 128.7, 128.3, 126.9, 125.3, 124.0, 122.3, 119.8, 111.0, 110.1, 109.1, 109.0, 64.8, 61.1, 56.9, 56.1, 55.9, 55.8, 53.0, 41.8, 33.8.

IR (film)  $\nu = 3523, 2936, 2833, 1663, 1623, 1513, 1463, 1379, 1221, 731$   $\text{cm}^{-1}$ .

HRMS (ESI,  $m/z$ ):  $[\text{M} + \text{H}]^+ \text{C}_{31}\text{H}_{33}\text{N}_2\text{O}_6^+ 529.2333$ , found 529.2335.

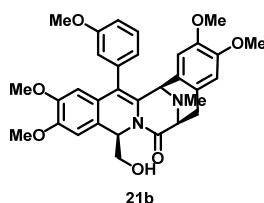

**21b:** (*d.r.*=1:0.9, two atropisomers), white solid, 75% yield. Flash column chromatography (DCM/MeOH = 80:1)

$[\alpha]_D^{20} = +108.50$  ( $c = 0.40$  in MeOH), mp: 115-118 °C

$^1\text{H}$  NMR (400 MHz,  $\text{CDCl}_3$ )  $\delta$  7.52-7.47 (m, 0.9H, one isomer), 7.46-7.41 (m, 1H, one isomer), 7.04-6.98 (m, 3.8H, two isomers), 6.93 (dt,  $J = 7.6, 1.2$  Hz, 1H, one isomer), 6.91-6.88 (m, 0.9H, one isomer), 6.72 (s, 1H, one isomer), 6.71 (s, 0.9H, one isomer), 6.59 (s, 1.9H, two isomers), 6.41 (s, 0.9H, one isomer), 6.33 (s, 1H, one isomer), 6.18 (s, 0.9H, one isomer), 6.16 (s, 1H, one isomer), 5.83-5.77 (m, 1.9H, two isomers), 4.53 (s, 1H, one isomer), 4.46 (s, 0.9H, one isomer), 3.90 (s, 3H, one isomer), 3.86 (s, 5.4H, one isomer), 3.84 (s, 2.7H, one isomer), 3.82 (s, 3H, one isomer), 3.82 (s, 3H, one isomer), 3.74 (s, 2.7H, one isomer), 3.71 (s, 3H, one isomer), 3.70-3.65 (m, 1.9H, two isomers), 3.61 (s, 2.7H, one isomer), 3.61 (s, 3H, one isomer), 3.35-3.25 (m, 3.8H, two isomers), 3.24-3.17 (m, 1.9H, two isomers), 3.03 (s, 1H, one isomer), 2.99 (s, 0.9H, one isomer), 2.65 (s, 3H, one isomer), 2.61 (s, 2.7H, one isomer), 1.03-0.95 (m, 1.9H, two isomers).

$^{13}\text{C}$  NMR (101 MHz,  $\text{CDCl}_3$ )  $\delta$  169.3 (overlap, two isomers), 160.2 & 160.2 (two isomers), 148.6 & 148.6 (two isomers), 148.5 (overlap, two isomers), 147.7 & 147.6 (two isomers), 137.8 & 137.8 (two isomers), 130.4 (overlap, two isomers), 129.9 & 129.9 (two isomers), 129.8 (overlap, two isomers), 127.0 (overlap, two isomers), 125.2 (overlap, two isomers), 124.1 (overlap, two isomers), 123.5 & 122.9 (two isomers), 122.2 (overlap, two isomers), 119.5 (overlap, two isomers), 118.0 & 116.6 (two isomers), 113.3 & 112.5 (two isomers), 111.0 (overlap, two isomers), 110.0 (overlap, two isomers), 109.2 (overlap, two isomers), 109.1 (overlap, two isomers), 64.8 & 64.7 (two isomers), 61.1 (overlap, two isomers), 57.0 & 56.9 (two isomers), 56.1 (overlap, two isomers), 56.0 (overlap,

two isomers), 55.8 (overlap, two isomers), 55.8 (overlap, two isomers), 55.4 & 55.3 (two isomers), 53.0 & 53.0 (two isomers), 41.9 & 41.8 (two isomers), 33.9 & 33.8 (two isomers).

IR (film)  $\nu$  = 3521, 2936, 2834, 1664, 1624, 1513, 1464, 1380, 1246, 733  $\text{cm}^{-1}$ .

HRMS (ESI,  $m/z$ ):  $[\text{M} + \text{H}]^+ \text{C}_{32}\text{H}_{35}\text{N}_2\text{O}_7^+$  559.2439, found 559.2436.

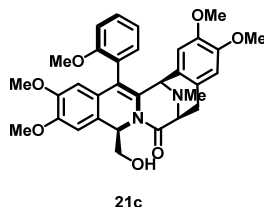

21c

**21c**: white solid, 28% yield. Flash column chromatography (petroleum ether/acetone = 2:1)

$[\alpha]_{\text{D}}^{20} = +76.00$  ( $c = 0.20$  in MeOH), mp: 118-122  $^{\circ}\text{C}$

$^1\text{H}$  NMR (400 MHz,  $\text{CDCl}_3$ )  $\delta$  7.49 (td,  $J = 8.4, 1.6$  Hz, 1H), 7.37 (dd,  $J = 7.6, 1.6$  Hz, 1H), 7.17 (td,  $J = 7.6, 1.2$  Hz, 1H), 7.08 (d,  $J = 8.4$  Hz, 1H), 6.71 (s, 1H), 6.59 (s, 1H), 6.24 (s, 1H), 6.04 (s, 1H), 5.80 (dd,  $J = 7.6, 5.2$  Hz, 1H), 4.49 (s, 1H), 3.87 (s, 3H), 3.81 (s, 3H), 3.69 (s, 3H), 3.69-3.67 (m, 1H), 3.67 (s, 3H), 3.57 (s, 3H), 3.38-3.25 (m, 3H), 3.03 (dd,  $J = 16.4, 1.6$  Hz, 1H), 2.65 (s, 3H), 0.92 (t,  $J = 6.8$  Hz, 1H).

$^{13}\text{C}$  NMR (101 MHz,  $\text{CDCl}_3$ )  $\delta$  169.1, 158.6, 148.8, 148.6, 148.3, 147.6, 132.1, 130.1, 129.8, 127.0, 125.6, 125.0, 124.4, 122.2, 121.4, 117.2, 111.8, 111.0, 110.4, 109.8, 108.0, 64.5, 61.3, 57.1, 56.1, 56.0, 55.9, 55.9, 55.8, 52.9, 41.9, 34.0.

IR (film)  $\nu$  = 3454, 2936, 2835, 1664, 1513, 1463, 1381, 1263, 779  $\text{cm}^{-1}$ .

HRMS (ESI,  $m/z$ ):  $[\text{M} + \text{H}]^+ \text{C}_{32}\text{H}_{35}\text{N}_2\text{O}_7^+$  559.2439, found 559.2436.

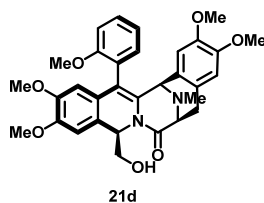

21d

**21d**: white solid, 31% yield. Flash column chromatography (petroleum ether/acetone = 2:1)

$[\alpha]_{\text{D}}^{20} = +120.00$  ( $c = 0.20$  in MeOH), mp: 120-123  $^{\circ}\text{C}$

$^1\text{H}$  NMR (400 MHz,  $\text{CDCl}_3$ )  $\delta$  7.48 (ddd,  $J = 8.4, 7.2, 1.6$  Hz, 1H), 7.26-7.23 (m, 1H), 7.13 (dd,  $J = 8.4, 0.8$  Hz, 1H), 7.09 (td,  $J = 7.2, 0.8$  Hz, 1H), 6.71 (s, 1H), 6.58 (s, 1H), 6.36 (s, 1H), 6.07 (s, 1H), 5.83 (dd,  $J = 7.6, 5.6$  Hz, 1H), 4.24 (s, 1H), 3.86 (s, 3H), 3.86 (s, 3H), 3.82 (s, 3H), 3.72 (s, 3H), 3.71-3.66 (m, 1H), 3.59 (s, 3H), 3.37-3.23 (m, 3H), 3.02 (d,  $J = 16.4$  Hz, 1H), 2.59 (s, 3H), 1.13 (t,  $J = 6.8$  Hz, 1H).

$^{13}\text{C}$  NMR (101 MHz,  $\text{CDCl}_3$ )  $\delta$  169.4, 157.5, 148.7, 148.5, 148.3, 147.5, 133.4, 130.8, 130.1, 127.1, 125.3, 124.8, 124.1, 122.3, 120.5, 115.3, 111.3, 111.0, 110.0, 109.3, 108.7, 64.9, 61.2, 57.6, 56.1, 55.9, 55.9, 55.8, 55.2, 53.2, 42.1, 33.7.

IR (film)  $\nu$  = 3449, 2936, 2834, 1664, 1513, 1463, 1381, 1257, 780  $\text{cm}^{-1}$ .

HRMS (ESI,  $m/z$ ):  $[\text{M} + \text{H}]^+ \text{C}_{32}\text{H}_{35}\text{N}_2\text{O}_7^+$  559.2439, found 559.2441.

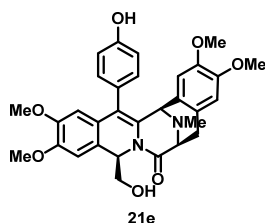

**21e:** white solid, 59% yield. Flash column chromatography (DCM/MeOH = 50:1)

$[\alpha]_D^{20} = +112.00$  ( $c = 0.40$  in MeOH), mp: 147-151 °C

$^1\text{H}$  NMR (400 MHz,  $\text{CDCl}_3$ )  $\delta$  7.27 (dd,  $J = 8.0, 2.0$  Hz, 1H), 7.18 (dd,  $J = 8.0, 2.0$  Hz, 1H), 7.00 (dd,  $J = 8.0, 2.8$  Hz, 1H), 6.96 (dd,  $J = 8.0, 2.4$  Hz, 1H), 6.71 (s, 1H), 6.59 (s, 1H), 6.47 (s, 1H), 6.33 (s, 1H), 6.16 (s, 1H), 5.80 (dd,  $J = 7.6, 5.2$  Hz, 1H), 4.51 (s, 1H), 3.85 (s, 3H), 3.81 (s, 3H), 3.72-3.69 (m, 1H), 3.70 (s, 3H), 3.60 (s, 3H), 3.33 (dd,  $J = 10.8, 6.0$  Hz, 1H), 3.29 (dd,  $J = 12.0, 6.0$  Hz, 1H), 3.24-3.16 (m, 1H), 3.03 (d,  $J = 12.0$  Hz, 1H), 2.63 (s, 3H), 1.09 (t,  $J = 6.8$  Hz, 1H).

$^{13}\text{C}$  NMR (101 MHz,  $\text{CDCl}_3$ )  $\delta$  169.3, 155.9, 148.6, 148.6, 148.4, 147.7, 132.5, 131.9, 129.9, 128.0, 126.9, 125.6, 124.0, 122.2, 119.6, 116.2, 116.0, 111.0, 110.0, 109.2, 109.1, 64.7, 61.1, 56.9, 56.1, 55.9, 55.8, 55.8, 53.1, 41.8, 33.8.

IR (film)  $\nu = 3313, 2937, 2834, 1664, 1514, 1464, 1382, 1264, 731\text{ cm}^{-1}$ .

HRMS (ESI,  $m/z$ ):  $[\text{M} + \text{H}]^+ \text{C}_{31}\text{H}_{33}\text{N}_2\text{O}_7^+ 545.2282$ , found 545.2280.

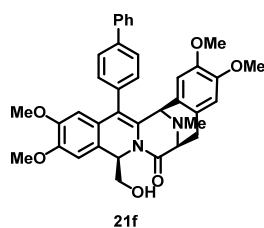

**21f:** white solid, 60% yield. Flash column chromatography (DCM/acetone = 5:1)

$[\alpha]_D^{20} = +124.00$  ( $c = 0.20$  in MeOH), mp: 131-133 °C

$^1\text{H}$  NMR (400 MHz,  $\text{CDCl}_3$ )  $\delta$  7.83 (dd,  $J = 8.0, 2.0$  Hz, 1H), 7.77 (dd,  $J = 8.0, 2.0$  Hz, 1H), 7.72-7.68 (m, 2H), 7.54-7.48 (m, 3H), 7.45-7.38 (m, 2H), 6.73 (s, 1H), 6.59 (s, 1H), 6.36 (s, 1H), 6.19 (s, 1H), 5.82 (dd,  $J = 7.6, 5.2$  Hz, 1H), 4.53 (s, 1H), 3.87 (s, 3H), 3.82 (s, 3H), 3.73 (s, 3H), 3.70 (d,  $J = 5.6$  Hz, 1H), 3.60 (s, 3H), 3.36-3.26 (m, 2H), 3.26-3.20 (m, 1H), 3.02 (d,  $J = 15.2$  Hz, 1H), 2.66 (s, 3H), 1.01 (t,  $J = 6.8$  Hz, 1H).

$^{13}\text{C}$  NMR (101 MHz,  $\text{CDCl}_3$ )  $\delta$  169.3, 148.7, 148.6, 148.5, 147.7, 141.0, 140.1, 135.4, 131.7, 131.2, 130.2, 129.0, 127.9, 127.8, 127.2, 127.0, 127.0, 125.3, 124.1, 122.3, 119.3, 111.1, 110.1, 109.1, 109.1, 64.8, 61.2, 57.0, 56.2, 56.0, 55.8, 55.8, 53.1, 41.9, 33.8.

IR (film)  $\nu = 3454, 2935, 2855, 1665, 1513, 1463, 1380, 1259, 1127, 754\text{ cm}^{-1}$ .

HRMS (ESI,  $m/z$ ):  $[\text{M} + \text{H}]^+ \text{C}_{37}\text{H}_{37}\text{N}_2\text{O}_6^+ 605.2646$ , found 605.2644.

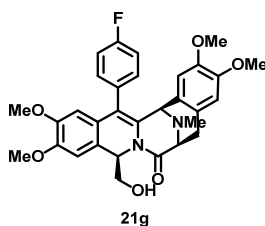

**21g**: white solid, 63% yield. Flash column chromatography (petroleum ether/acetone = 2:1)

$[\alpha]_D^{20} = +78.50$  ( $c = 0.40$  in MeOH), mp: 123-125 °C

$^1\text{H}$  NMR (400 MHz,  $\text{CDCl}_3$ )  $\delta$  7.43 (ddd,  $J = 8.0, 5.6, 2.4$  Hz, 1H), 7.33 (ddd,  $J = 8.0, 5.2, 2.0$  Hz, 1H), 7.28 (dd,  $J = 8.4, 2.8$  Hz, 1H), 7.23 (td,  $J = 8.4, 2.8$  Hz, 1H), 6.71 (s, 1H), 6.59 (s, 1H), 6.26 (s, 1H), 6.06 (s, 1H), 5.79 (dd,  $J = 7.6, 5.2$  Hz, 1H), 4.42 (s, 1H), 3.86 (s, 3H), 3.81 (s, 3H), 3.71 (s, 3H), 3.68 (dt,  $J = 5.6, 1.6$  Hz, 1H), 3.59 (s, 3H), 3.33-3.25 (m, 2H), 3.22-3.15 (m, 1H), 3.00 (dd,  $J = 16.4, 1.6$  Hz, 1H), 2.62 (s, 3H), 1.09-1.00 (m, 1H).

$^{13}\text{C}$  NMR (101 MHz,  $\text{CDCl}_3$ )  $\delta$  169.2, 162.5 (d,  $J_{\text{C-F}} = 249.4$  Hz), 148.7, 148.6, 148.5, 147.7, 132.9 (d,  $J_{\text{C-F}} = 7.9$  Hz), 132.5 (d,  $J_{\text{C-F}} = 7.9$  Hz), 132.4 (d,  $J_{\text{C-F}} = 3.6$  Hz), 130.5, 126.7, 125.2, 124.2, 122.3, 118.6, 116.4 (d,  $J_{\text{C-F}} = 21.3$  Hz), 116.0 (d,  $J = 21.4$  Hz), 111.1, 110.1, 108.9, 108.8, 64.7, 61.1, 57.0, 56.2, 55.9, 55.8, 53.0, 41.8, 33.7.

$^{19}\text{F}$  NMR (376 MHz,  $\text{CDCl}_3$ )  $\delta$  -112.9 (s).

IR (film)  $\nu = 3520, 2937, 2834, 1664, 1511, 1464, 1380, 1222, 1127, 779$   $\text{cm}^{-1}$ .

HRMS (ESI,  $m/z$ ):  $[\text{M} + \text{H}]^+ \text{C}_{31}\text{H}_{32}\text{FN}_2\text{O}_6^+ 547.2239$ , found 547.2236.

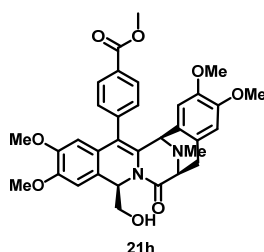

**21h**: white solid, 42% yield. Flash column chromatography (petroleum ether/acetone = 2:1)

$[\alpha]_D^{20} = +96.20$  ( $c = 0.20$  in MeOH), mp: 130-134 °C

$^1\text{H}$  NMR (400 MHz,  $\text{CDCl}_3$ )  $\delta$  8.28 (dd,  $J = 8.0, 1.6$  Hz, 1H), 8.21 (dd,  $J = 8.0, 2.0$  Hz, 1H), 7.55 (dd,  $J = 8.0, 1.6$  Hz, 1H), 7.46 (dd,  $J = 8.0, 1.6$  Hz, 1H), 6.72 (s, 1H), 6.59 (s, 1H), 6.22 (s, 1H), 6.01 (s, 1H), 5.81 (dd,  $J = 7.6, 5.2$  Hz, 1H), 4.39 (s, 1H), 3.99 (s, 3H), 3.86 (s, 3H), 3.82 (s, 3H), 3.70 (s, 3H), 3.70-3.67 (m, 1H), 3.56 (s, 3H), 3.34-3.26 (m, 2H), 3.25-3.17 (m, 1H), 3.01 (dd,  $J = 16.4, 1.6$  Hz, 1H), 2.64 (s, 3H), 0.98 (t,  $J = 6.8$  Hz, 1H).

$^{13}\text{C}$  NMR (101 MHz,  $\text{CDCl}_3$ )  $\delta$  169.2, 166.6, 148.7, 148.7, 148.6, 147.7, 141.7, 131.5, 131.0, 130.7, 130.4, 130.2, 129.9, 126.6, 124.7, 124.2, 122.3, 118.7, 111.1, 110.2, 108.8, 108.7, 64.8, 61.2, 57.1, 56.2, 55.9, 55.9, 55.8, 53.0, 52.4, 41.8, 33.7.

IR (film)  $\nu = 3518, 2938, 2834, 1721, 1665, 1513, 1463, 1380, 1267, 1120, 741$   $\text{cm}^{-1}$ .

HRMS (ESI,  $m/z$ ):  $[\text{M} + \text{H}]^+ \text{C}_{33}\text{H}_{35}\text{N}_2\text{O}_8^+ 587.2388$ , found 587.2387.

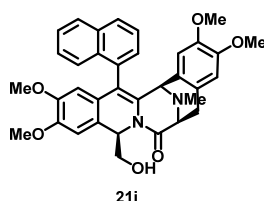

**21i**:  $d.r.$  = 1:0.3 (two atropisomers), white solid, 80% yield. Flash column chromatography (DCM/MeOH = 80:1)

$[\alpha]_D^{20} = +128.50$  ( $c = 0.40$  in MeOH), mp: 130-133 °C

$^1\text{H}$  NMR (400 MHz,  $\text{CDCl}_3$ )  $\delta$  8.05-7.98 (m, 3H, one isomer), 7.96-7.93 (m, 0.3H, one isomer),



7.69-7.46 (m, 5.5H, two isomers), 7.41-7.36 (m, 0.3H, one isomer), 6.77 (s, 0.3H, one isomer), 6.76 (s, 1H, one isomer), 6.57 (s, 1H, one isomer), 6.54 (s, 0.3H, one isomer), 6.47 (s, 1H, one isomer), 5.94-5.89 (m, 2.3H, two isomers), 5.86 (s, 0.3H, one isomer), 5.47 (s, 0.3H, one isomer), 4.55 (s, 0.3H, one isomer), 3.97 (s, 1H, one isomer), 3.87 (s, 3.9H, two isomers), 3.82 (s, 3H, one isomer), 3.81 (s, 3H, one isomer), 3.77 (s, 0.9H, one isomer), 3.76-3.70 (m, 1.3H, two isomers), 3.58-3.34 (m, 2.6H, two isomers), 3.34-3.30 (m, 0.3H, one isomer), 3.33 (s, 3.9H, two isomers), 3.25 (dd,  $J=16.4, 6.0$  Hz, 1H, one isomer), 3.06-2.95 (m, 1.3H, two isomers), 2.94 (s, 0.9H, one isomer), 2.73 (s, 0.9H, one isomer), 2.43 (s, 3H, one isomer), 1.22-1.16 (m, 1.3H, two isomers).

$^{13}\text{C}$  NMR (101 MHz,  $\text{CDCl}_3$ )  $\delta$  169.6 & 169.4 (two isomers), 148.70 (overlap, two isomers), 148.6 & 148.5 (two isomers), 148.5 & 148.4 (two isomers), 147.5 & 147.5 (two isomers), 134.0 & 133.9 (two isomers), 133.3 & 133.1 (two isomers), 131.9 (overlap, two isomers), 129.8 (overlap, two isomers), 129.0 & 128.9 (two isomers), 128.8 & 128.6 (two isomers), 127.0 & 126.8 (two isomers), 126.7 & 126.5 (two isomers), 126.3 (overlap, two isomers), 126.1 & 126.1 (two isomers), 125.8 (overlap, two isomers), 125.7 (overlap, two isomers), 125.4 & 125.0 (two isomers), 124.1 & 123.8 (two isomers), 122.1 & 121.9 (two isomers), 117.1 & 116.5 (two isomers), 111.1 & 110.8 (two isomers), 110.0 (overlap, two isomers), 109.6 & 109.3 (two isomers), 109.1 & 109.0 (two isomers), 65.5 & 64.9 (two isomers), 61.2 & 61.0 (two isomers), 57.3 & 57.0 (two isomers), 56.1 & 56.1 (two isomers), 55.9 & 55.8 (two isomers), 55.8 & 55.7 (two isomers), 55.0 (two isomers), 53.3 (two isomers), 42.1 & 42.0 (two isomers), 33.7 & 32.1 (two isomers).

IR (film)  $\nu=3523, 2935, 2833, 1664, 1512, 1463, 1378, 1255, 1131, 782\text{ cm}^{-1}$ .

HRMS (ESI,  $m/z$ ):  $[\text{M} + \text{H}]^+ \text{C}_{35}\text{H}_{35}\text{N}_2\text{O}_6^+ 579.2490$ , found 579.2487.

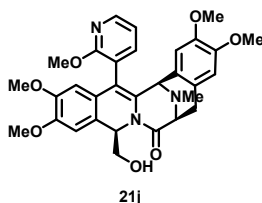

**21j**:  $d.r.=1:0.7$  (two atropisomers), white solid, 46% yield. Flash column chromatography (petroleum ether/acetone = 4:1)

$[\alpha]_{\text{D}}^{20} = +0.21$  ( $c = 0.40$  in MeOH), mp: 118-120 °C

$^1\text{H}$  NMR (400 MHz,  $\text{CDCl}_3$ )  $\delta$  8.36 (ddd,  $J = 7.2, 4.8, 1.6$  Hz, 1.7H, two isomers), 7.68 (dd,  $J = 7.2, 2.0$  Hz, 1H, one isomer), 7.59 (dd,  $J = 7.2, 2.0$  Hz, 0.7H, one isomer), 7.13 (dd,  $J = 7.2, 5.2$  Hz, 1H, one isomer), 7.07 (dd,  $J = 7.2, 4.8$  Hz, 0.7H, one isomer), 6.72 (s, 1H, one isomer), 6.72 (s, 0.7H, one isomer), 6.60 (s, 1H, one isomer), 6.59 (s, 0.7H, one isomer), 6.25 (s, 0.7H, one isomer), 6.13 (s, 1H, one isomer), 6.01 (s, 0.7H, one isomer), 5.97 (s, 1H, one isomer), 5.84-5.77 (m, 1.7H, two isomers), 4.42 (s, 1H, one isomer), 4.20 (s, 0.7H, one isomer), 4.01 (s, 2.1H, one isomer), 3.87 (s, 3H, one isomer), 3.86 (s, 2.1H, one isomer), 3.84 (s, 3H, one isomer), 3.82 (s, 2.1H, one isomer), 3.81 (s, 3H, one isomer), 3.72-3.67 (m, 1.7H, two isomers), 3.70 (s, 2.1H, one isomer), 3.69 (s, 3H, one isomer), 3.60 (s, 2.1H, one isomer), 3.59 (s, 3H, one isomer), 3.36-3.20 (m, 5.1H, two isomers), 3.05-3.02 (m, 1H, one isomer), 3.01-2.97 (m, 0.7H, one isomer), 2.64 (s, 3H, one isomer), 2.60 (s, 2.1H, one isomer), 0.94-0.83 (m, 1.7H, two isomers).

$^{13}\text{C}$  NMR (101 MHz,  $\text{CDCl}_3$ )  $\delta$  169.3 & 169.0 (two isomers), 162.9 & 162.2 (two isomers), 148.9 & 148.8 (two isomers), 148.7 & 148.6 (two isomers), 148.5 & 148.5 (two isomers), 147.7 & 147.7 (two isomers), 147.5 (overlap, two isomers), 142.1 & 140.8 (two isomers), 131.8 & 130.6 (two isomers).

isomers), 126.7 & 126.5 (two isomers), 124.7 & 124.7 (two isomers), 124.4 & 124.3 (two isomers), 122.4 & 122.3 (two isomers), 119.3 & 118.9 (two isomers), 117.1 & 116.5 (two isomers), 115.3 & 113.4 (two isomers), 111.2 & 111.1 (two isomers), 110.2 & 110.0 (two isomers), 109.8 & 108.9 (two isomers), 108.3 & 107.6 (two isomers), 64.8 & 64.3 (two isomers), 61.2 & 61.1 (two isomers), 57.6 & 57.2 (two isomers), 56.1 & 56.1 (two isomers), 56.02 (overlap, two isomers), 55.9 & 55.8 (two isomers), 55.8 (overlap, two isomers), 54.0 & 53.6 (two isomers), 53.1 & 52.9 (two isomers), 42.0 & 41.9 (two isomers), 33.8 & 33.6 (two isomers).

IR (film)  $\nu$  = 3511, 2940, 2835, 1667, 1513, 1462, 1380, 1246, 1127, 782  $\text{cm}^{-1}$ .

HRMS (ESI,  $m/z$ ):  $[M + H]^+ \text{C}_{31}\text{H}_{34}\text{N}_3\text{O}_7^+$  560.2391, found 560.2390.

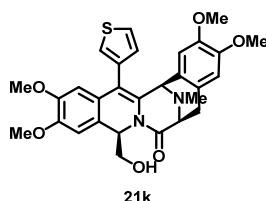

**21k**: white solid, 87% yield. Flash column chromatography (DCM/MeOH = 80:1)

$[\alpha]_D^{20} = +181.50$  ( $c = 0.40$  in MeOH), mp: 118-122  $^{\circ}\text{C}$

$^1\text{H}$  NMR (400 MHz,  $\text{CDCl}_3$ )  $\delta$  7.58 (dd,  $J = 5.2, 3.2$  Hz, 1H), 7.35-7.32 (m, 1H), 7.13 (s, 1H), 6.70 (s, 1H), 6.59 (s, 1H), 6.31 (s, 1H), 6.19 (s, 1H), 5.78 (dd,  $J = 7.6, 5.2$  Hz, 1H), 4.58 (s, 1H), 3.86 (s, 3H), 3.82 (s, 3H), 3.71 (s, 3H), 3.68 (dt,  $J = 5.6, 1.6$  Hz, 1H), 3.63 (s, 3H), 3.31 (dd,  $J = 11.2, 6.0$  Hz, 1H), 3.27 (dd,  $J = 11.2, 6.0$  Hz, 1H), 3.22-3.14 (m, 1H), 3.01 (dd,  $J = 16.4, 1.6$  Hz, 1H), 2.62 (s, 3H), 1.01 (t,  $J = 6.8$  Hz, 1H).

$^{13}\text{C}$  NMR (101 MHz,  $\text{CDCl}_3$ )  $\delta$  169.2, 148.7, 148.5, 148.5, 147.7, 131.0, 129.8, 127.0, 126.8, 125.1, 124.1, 122.1, 111.0, 110.0, 109.1, 108.7, 64.8, 61.1, 57.1, 56.1, 55.9, 55.9, 55.8, 53.0, 41.7, 33.8.

IR (film)  $\nu$  = 3527, 2935, 2854, 1664, 1513, 1463, 1379, 1223, 1127, 731  $\text{cm}^{-1}$ .

HRMS (ESI,  $m/z$ ):  $[M + H]^+ \text{C}_{29}\text{H}_{31}\text{N}_2\text{O}_6\text{S}^+$  535.1897, found 535.1895.

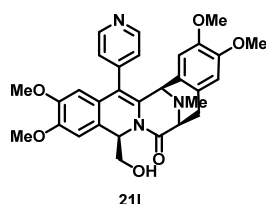

**21l**: white solid, 66% yield. Flash column chromatography (DCM/MeOH = 80:1)

$[\alpha]_D^{20} = +88.50$  ( $c = 0.40$  in MeOH), mp: 98-102  $^{\circ}\text{C}$

$^1\text{H}$  NMR (400 MHz,  $\text{CDCl}_3$ )  $\delta$  8.88 (d,  $J = 4.8$  Hz, 1H), 8.81 (d,  $J = 5.2$  Hz, 1H), 7.43 (d,  $J = 4.8$  Hz, 1H), 7.34 (d,  $J = 4.8$  Hz, 1H), 6.73 (s, 1H), 6.60 (s, 1H), 6.18 (s, 1H), 6.01 (s, 1H), 5.80 (dd,  $J = 7.2, 5.2$  Hz, 1H), 4.38 (s, 1H), 3.87 (s, 3H), 3.82 (s, 3H), 3.73-3.69 (m, 1H), 3.70 (s, 3H), 3.59 (s, 3H), 3.35-3.26 (m, 2H), 3.20 (dt,  $J = 11.6, 7.2$  Hz, 1H), 3.00 (dd,  $J = 16.4, 1.6$  Hz, 1H), 2.64 (s, 3H), 0.96 (t,  $J = 6.8$  Hz, 1H).

$^{13}\text{C}$  NMR (101 MHz,  $\text{CDCl}_3$ )  $\delta$  169.2, 151.2, 150.2, 148.8, 148.8, 148.8, 147.7, 145.5, 130.8, 126.4, 126.3, 125.9, 124.3, 123.9, 122.4, 117.1, 111.2, 110.3, 108.7, 108.5, 64.7, 61.1, 57.1, 56.2, 56.0, 55.8, 53.0, 41.8, 33.6.

IR (film)  $\nu$  = 3269, 2937, 2834, 1667, 1513, 1463, 1379, 1223, 731  $\text{cm}^{-1}$ .

HRMS (ESI,  $m/z$ ):  $[M + H]^+ \text{C}_{30}\text{H}_{32}\text{N}_3\text{O}_6^+$  530.2286, found 530.2283.

## 2.19 Compound 21m

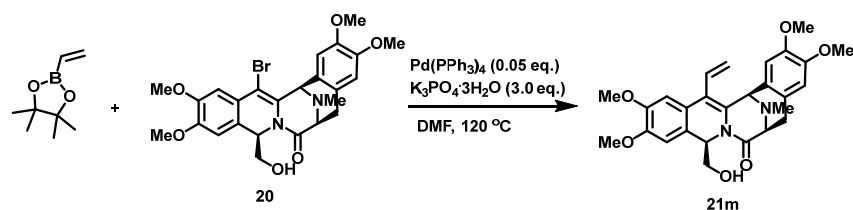

A mixture of **20** (37.1 mg, 0.07 mmol, 1.0 equiv.), pimacol vinylboronate (28.5  $\mu$ L, 0.168 mmol, 2.4 equiv.), Pd(PPh<sub>3</sub>)<sub>4</sub> (4.0 mg, 0.0035 mmol, 0.05 equiv.), K<sub>3</sub>PO<sub>4</sub>·3H<sub>2</sub>O (56.0 mg, 0.21 mmol, 3.0 equiv.) in DMF (2 mL) was stirred at 120 °C under N<sub>2</sub> overnight. The reaction was quenched with H<sub>2</sub>O, and the whole mixture was extracted with DCM. The combined extracts were washed with saturated brine, dried (Na<sub>2</sub>SO<sub>4</sub>) and concentrated in vacuo. The residue was purified by silica gel column chromatography (DCM/MeOH = 80:1) to afford **21m** (86%) as a white solid.

$[\alpha]_D^{20} = +88.00$  (c = 0.20 in MeOH), mp: 102-105 °C

<sup>1</sup>H NMR (400 MHz, CDCl<sub>3</sub>)  $\delta$  6.97 (s, 1H), 6.85 (dd, *J* = 18.0, 11.2 Hz, 1H), 6.71 (s, 1H), 6.69 (s, 1H), 6.63 (s, 1H), 5.77 (dd, *J* = 11.2, 1.6 Hz, 1H), 5.70 (dd, *J* = 7.6, 5.2 Hz, 1H), 5.60 (dd, *J* = 18.0, 2.0 Hz, 1H), 4.95 (s, 1H), 3.87 (s, 3H), 3.86 (s, 3H), 3.84 (s, 3H), 3.76 (s, 3H), 3.67 (dt, *J* = 5.2, 1.6 Hz, 1H), 3.35 (dd, *J* = 16.0, 6.0 Hz, 1H), 3.21-3.13 (m, 1H), 3.07-2.99 (m, 2H), 2.56 (s, 3H), 0.82 (t, *J* = 6.8 Hz, 1H);

<sup>13</sup>C NMR (101 MHz, CDCl<sub>3</sub>)  $\delta$  169.1, 148.8, 148.5, 148.4, 147.9, 131.6, 130.2, 127.2, 124.4, 123.1, 123.0, 121.4, 116.8, 111.2, 110.3, 108.9, 108.7, 64.2, 61.0, 56.4, 56.1, 56.1, 55.9, 55.8, 52.8, 41.7, 33.9.

IR (film)  $\nu$  = 3525, 2935, 2855, 1662, 1512, 1464, 1377, 1359, 1258, 780 cm<sup>-1</sup>.

HRMS (ESI, *m/z*): [M + H]<sup>+</sup> C<sub>27</sub>H<sub>31</sub>N<sub>2</sub>O<sub>6</sub><sup>+</sup> 479.2177, found 479.2174.

## 2.20 Compound 21n

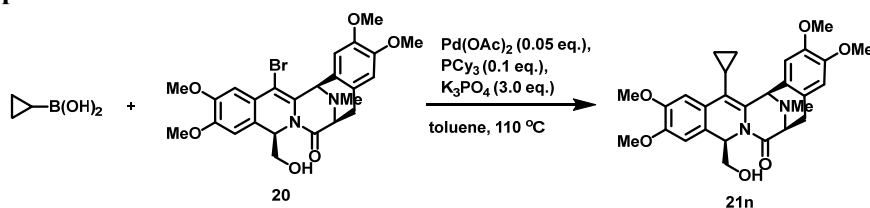

A mixture of **20** (37.1 mg, 0.07 mmol, 1.0 equiv.), cyclopropyl boronic acid (14.4 mg, 0.168 mmol, 2.4 equiv.), Pd(OAc)<sub>2</sub> (0.8 mg, 0.0035 mmol, 0.05 equiv.), PCy<sub>3</sub> (1.96 mg, 0.007 mmol, 0.1 equiv.), K<sub>3</sub>PO<sub>4</sub> (44.6 mg, 0.21 mmol, 3.0 equiv.) in toluene (2 mL) was stirred at 110 °C under N<sub>2</sub> overnight. The reaction was quenched with H<sub>2</sub>O, and the whole mixture was extracted with DCM. The combined extracts were washed with saturated brine, dried (Na<sub>2</sub>SO<sub>4</sub>) and concentrated in vacuo. The residue was purified by silica gel column chromatography (DCM/MeOH = 80:1) to afford **21n** (54%) as a white solid.

$[\alpha]_D^{20} = +156.00$  (c = 0.20 in MeOH), mp: 104-106 °C

<sup>1</sup>H NMR (400 MHz, CDCl<sub>3</sub>)  $\delta$  7.35 (s, 1H), 6.90 (s, 1H), 6.66 (s, 1H), 6.65 (s, 1H), 5.68 (dd, *J* = 8.4, 5.2 Hz, 1H), 5.29 (s, 1H), 3.92 (s, 3H), 3.86 (s, 3H), 3.84 (s, 3H), 3.82 (s, 3H), 3.62 (dt, *J* = 5.2, 1.6 Hz, 1H), 3.32 (dd, *J* = 16.0, 5.6 Hz, 1H), 3.15 (ddd, *J* = 11.6, 8.0, 5.2 Hz, 1H), 3.07-2.96 (m,

2H), 2.51 (s, 3H), 1.82-1.74 (m, 1H), 1.40-1.32 (m, 1H), 1.23-1.15 (m, 1H), 0.89-0.81 (m, 1H), 0.77-0.70 (m, 1H), 0.66 (dd,  $J = 8.0, 5.6$  Hz, 1H).

$^{13}\text{C}$  NMR (101 MHz,  $\text{CDCl}_3$ )  $\delta$  169.1, 148.7, 148.3, 148.2, 147.8, 132.1, 127.0, 125.2, 124.7, 123.1, 117.6, 111.6, 109.9, 109.7, 108.4, 63.5, 61.2, 56.6, 56.1, 55.8, 52.4, 41.6, 34.1, 10.2, 9.2, 7.4.

IR (film)  $\nu = 3519, 2936, 2833, 1657, 1511, 1464, 1343, 1264, 732\text{ cm}^{-1}$ .

HRMS (ESI,  $m/z$ ):  $[\text{M} + \text{H}]^+ \text{C}_{28}\text{H}_{33}\text{N}_2\text{O}_6^+ 493.2333$ , found 493.2332.

## 2.21 Compounds **21o** and **21p**

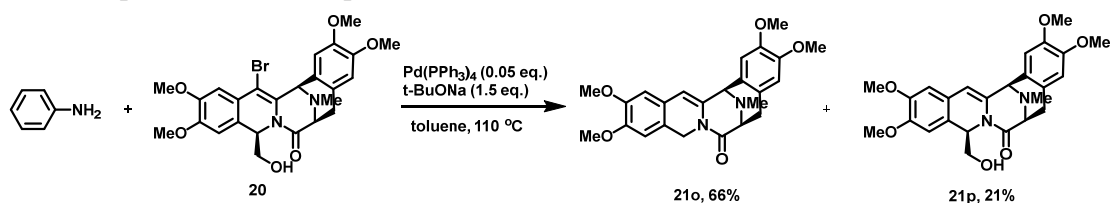

To a solution of **20** (37.1 mg, 0.07 mmol, 1.0 equiv.),  $\text{Pd}(\text{PPh}_3)_4$  (4.0 mg, 0.0035 mmol, 0.05 equiv.),  $t\text{-BuONa}$  (10.1 mg, 0.105 mmol, 1.5 equiv.) in toluene (2 mL) was added aniline (9.6  $\mu\text{L}$ , 0.105 mmol, 1.0 equiv.) under  $\text{N}_2$ . The reaction was stirred at 110  $^\circ\text{C}$  overnight, until it was quenched with  $\text{H}_2\text{O}$ . The whole mixture was extracted with DCM. The combined extracts were washed with saturated brine, dried ( $\text{Na}_2\text{SO}_4$ ) and concentrated in vacuo. The residue was purified by silica gel column chromatography (DCM/MeOH = 80:1) to afford **21o** (66%, yellow solid) and **21p** (21%, yellow solid).

Characterizations of **21o**:

$[\alpha]_{\text{D}}^{20} = -30.00$  ( $c = 0.20$  in MeOH), mp: 118-123  $^\circ\text{C}$

$^1\text{H}$  NMR (400 MHz,  $\text{CDCl}_3$ )  $\delta$  6.69 (s, 1H), 6.61 (s, 1H), 6.60 (s, 1H), 6.58 (s, 1H), 5.78 (s, 1H), 5.30 (d,  $J = 16.8$  Hz, 1H), 4.35 (d,  $J = 16.8$  Hz, 1H), 4.17 (s, 1H), 3.88 (s, 3H), 3.86 (s, 3H), 3.84 (s, 6H), 3.70 (dt,  $J = 6.4, 1.6$  Hz, 1H), 3.32 (dd,  $J = 16.4, 6.4$  Hz, 1H), 3.00 (dd,  $J = 16.4, 1.6$  Hz, 1H), 2.54 (s, 3H).

$^{13}\text{C}$  NMR (101 MHz,  $\text{CDCl}_3$ )  $\delta$  167.9, 148.8, 148.3, 148.2, 147.6, 134.9, 126.9, 124.2, 122.6, 121.1, 111.3, 110.1, 109.4, 108.5, 105.3, 61.5, 61.1, 56.1, 56.1, 55.9, 43.7, 41.5, 32.8.

IR (film)  $\nu = 2937, 2833, 1640, 1514, 1464, 1359, 1254, 1126, 1002\text{ cm}^{-1}$ .

HRMS (ESI,  $m/z$ ):  $[\text{M} + \text{H}]^+ \text{C}_{24}\text{H}_{27}\text{N}_2\text{O}_5^+ 423.1914$ , found 423.1913.

Characterizations of **21p**:

$[\alpha]_{\text{D}}^{20} = +23.00$  ( $c = 0.40$  in MeOH), mp: 117-120  $^\circ\text{C}$

$^1\text{H}$  NMR (400 MHz,  $\text{CDCl}_3$ )  $\delta$  6.67 (s, 1H), 6.66 (s, 1H), 6.66 (s, 1H), 6.63 (s, 1H), 5.90 (s, 1H), 5.70 (dd,  $J = 7.2, 5.2$  Hz, 1H), 4.20 (s, 1H), 3.88 (s, 3H), 3.85 (s, 3H), 3.85 (s, 3H), 3.84 (s, 3H), 3.69 (dt,  $J = 6.0, 1.2$  Hz, 1H), 3.36 (dd,  $J = 16.0, 6.0$  Hz, 1H), 3.26-3.19 (m, 1H), 3.17-3.09 (m, 1H), 3.03 (dd,  $J = 16.4, 1.6$  Hz, 1H), 2.54 (s, 3H), 1.16 (t,  $J = 6.0$  Hz, 1H).

$^{13}\text{C}$  NMR (101 MHz,  $\text{CDCl}_3$ )  $\delta$  168.9, 149.0, 148.8, 148.3, 147.9, 133.6, 126.5, 124.2, 122.8, 122.0, 111.1, 110.3, 109.5, 108.5, 106.2, 65.0, 61.7, 61.4, 56.1, 56.1, 56.0, 55.8, 53.8, 41.8, 33.9.

IR (film)  $\nu = 3518, 2936, 2835, 1637, 1513, 1464, 1359, 1265, 1128, 732$ .

HRMS (ESI,  $m/z$ ):  $[\text{M} + \text{Na}]^+ \text{C}_{32}\text{H}_{28}\text{N}_2\text{NaO}_6^+ 475.1840$ , found 475.1841.

### 3. The cytotoxicity test

**Cell Lines and Culture Methods.** A549 and HepG2 cell lines were cultured in RPMI-1640 (KeyGen BioTECH, KGM31800H-500) medium supplemented with 10% (v/v) fetal bovine serum (FBS, CELLMAX, SA311.02) and 1% (v/v) penicillin–streptomycin. MDA-MB-231 cell line was cultured in DMEM (KeyGen BioTECH, KGM12800-500) supplemented with 10% (v/v) FBS and 1% (v/v) penicillin–streptomycin. All cells were grown in a humidified incubator at 37 °C and 5% CO<sub>2</sub>.

**Cell Growth Inhibition Assays.** Cells were grown at 37 °C, under 95% air and 5% CO<sub>2</sub> until about reaching 70% confluency, and subcultured at least twice before the experiment. Cells were seeded in 96-well plates at the individual density in 100 µL of culture medium for 24 h. The cell seeding numbers for individual cell lines were as follows: A549 (2500/well), HepG2 (1500/well), MDA-MB-231 (2800/well) and L-02 (800/well). Compounds were prepared as a 10 mM stock solution in 100% DMSO, and each compound of final gradient concentrations from 1 µM to 84 µM was added to each well. After 72 h, cell viability was assessed by 3-(4,5-dimethylthiazol-2-yl)-2,5-diphenyl tetrazolium bromide (MTT) assay. Briefly, 40 µL MTT (2.5 mg/mL in PBS, KeyGen BioTECH) was added to each well and incubated for 3–4 h, then the medium was discarded and replaced with 150 µL dimethyl sulfoxide (DMSO, Sigma–Aldrich). The plates were shaken for 10 mins for mixing and the absorbance was read at 490 nm via the microplate reader (ALLSHENG). The readings were normalized to the DMSO-treated cells, and the IC<sub>50</sub> was calculated by nonlinear regression analysis using GraphPad Prism 8 software.

**Table S1.** Preliminary examination of inhibitory activities against the proliferation of A549 cells at 60 µM.

| Compound  | Inhibition % | Compound   | Inhibition % | Compound         | Inhibition % |
|-----------|--------------|------------|--------------|------------------|--------------|
| <b>12</b> | 0            | <b>21a</b> | 18.7         | <b>21i</b>       | 24.2         |
| <b>13</b> | 24.1         | <b>21b</b> | 5.8          | <b>21j</b>       | 9.9          |
| <b>15</b> | 7.9          | <b>21c</b> | 9.8          | <b>21k</b>       | 14.3         |
| <b>16</b> | 21.8         | <b>21d</b> | 22.2         | <b>21l</b>       | 7.6          |
| <b>17</b> | 14.4         | <b>21e</b> | 28.9         | <b>21m</b>       | 0            |
| <b>18</b> | 21.7         | <b>21f</b> | <b>83.6</b>  | <b>21n</b>       | 0            |
| <b>19</b> | 0            | <b>21g</b> | 33.3         | <b>21o</b>       | 8.0          |
| <b>20</b> | 13.9         | <b>21h</b> | 15.5         | <b>21p</b>       | 0            |
|           |              |            |              | <b>Cisplatin</b> | 73.9         |

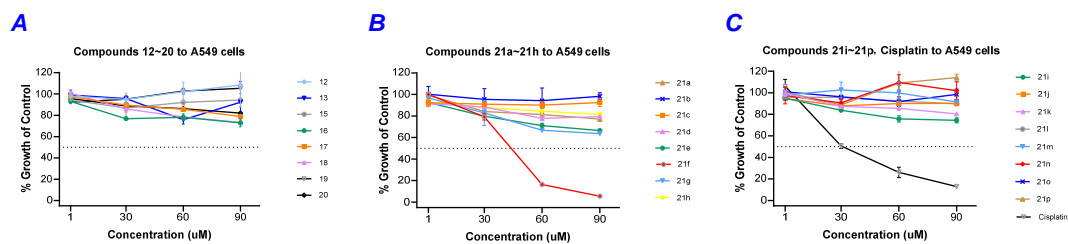

**Figure S1.** Cytotoxicity assessment of simplified ecteinascidin-cribrostatin analogs 12~20 (A), 21a~21h (B), 21i~21p and Cisplatin (C). A549 cells were treated with indicated doses for 3 days. Cell viability was determined by the MTT assay.

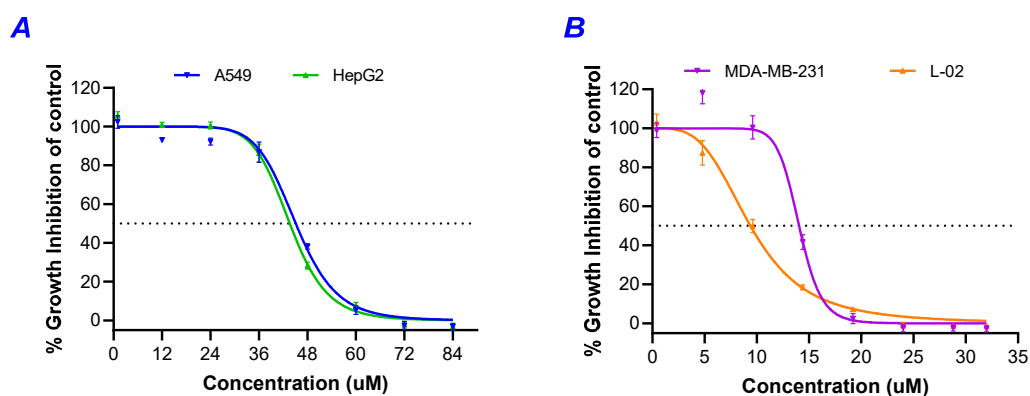

**Figure S2.** A549 and HepG2 (A), MDA-MB-231 cancer cells and L-02 normal cells (B) were incubated with increasing concentrations of compound 21f and growth over 72 h was assessed by the MTT assay.

#### 4. Copies of $^1\text{H}$ , $^{13}\text{C}$ , $^{19}\text{F}$ and 2D NMR spectra

$^1\text{H}$  NMR Spectrum of 1 (400 MHz,  $\text{DMSO}-d_6$ )

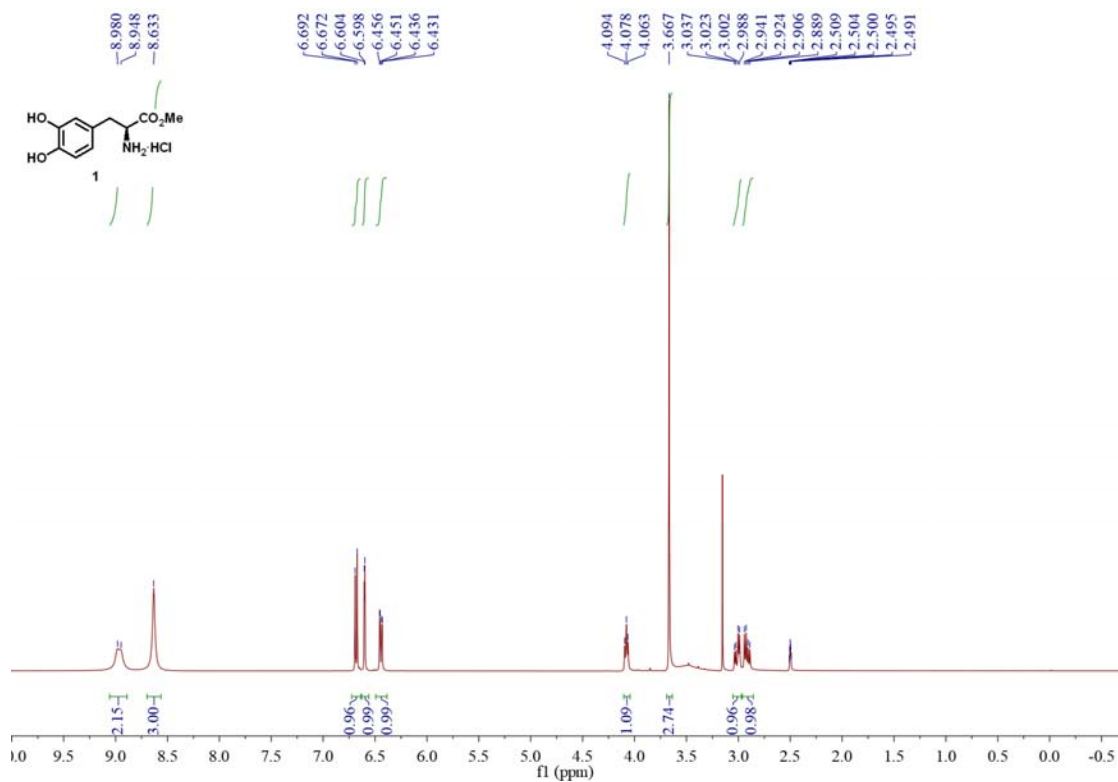

$^1\text{H}$  NMR Spectrum of 2 (400 MHz,  $\text{CDCl}_3$ )

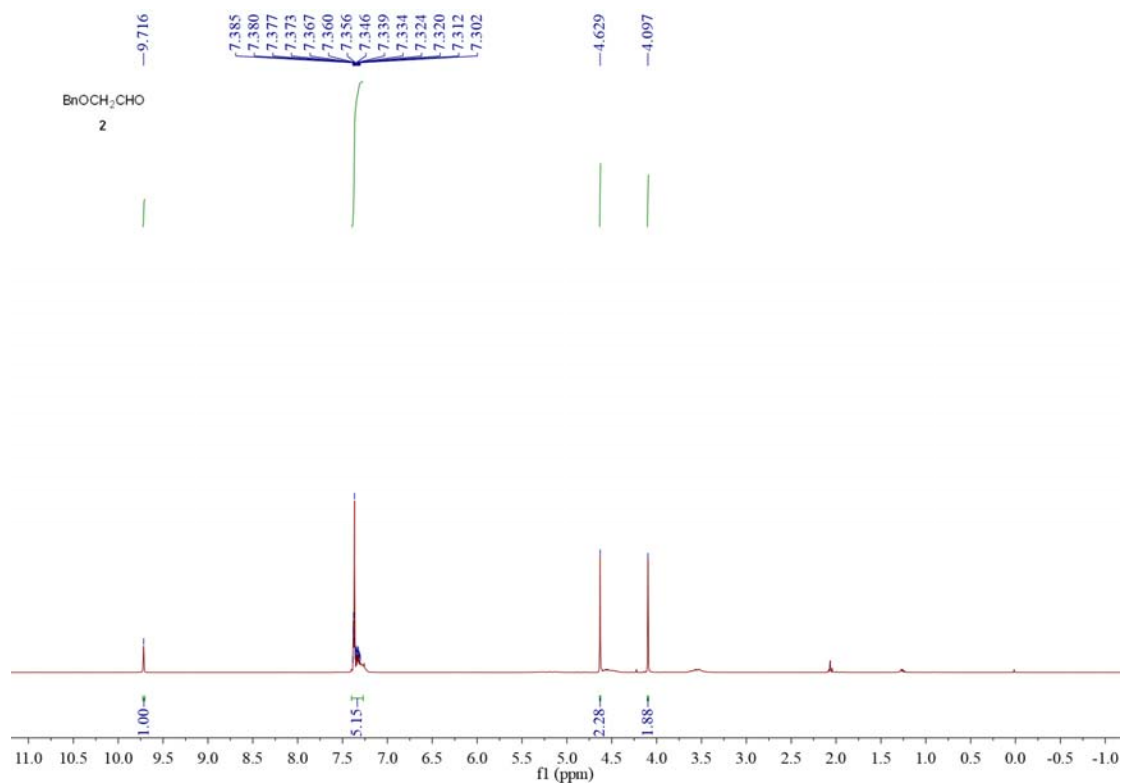

# <sup>1</sup>H NMR Spectrum of 3 (400 MHz, CDCl<sub>3</sub>)

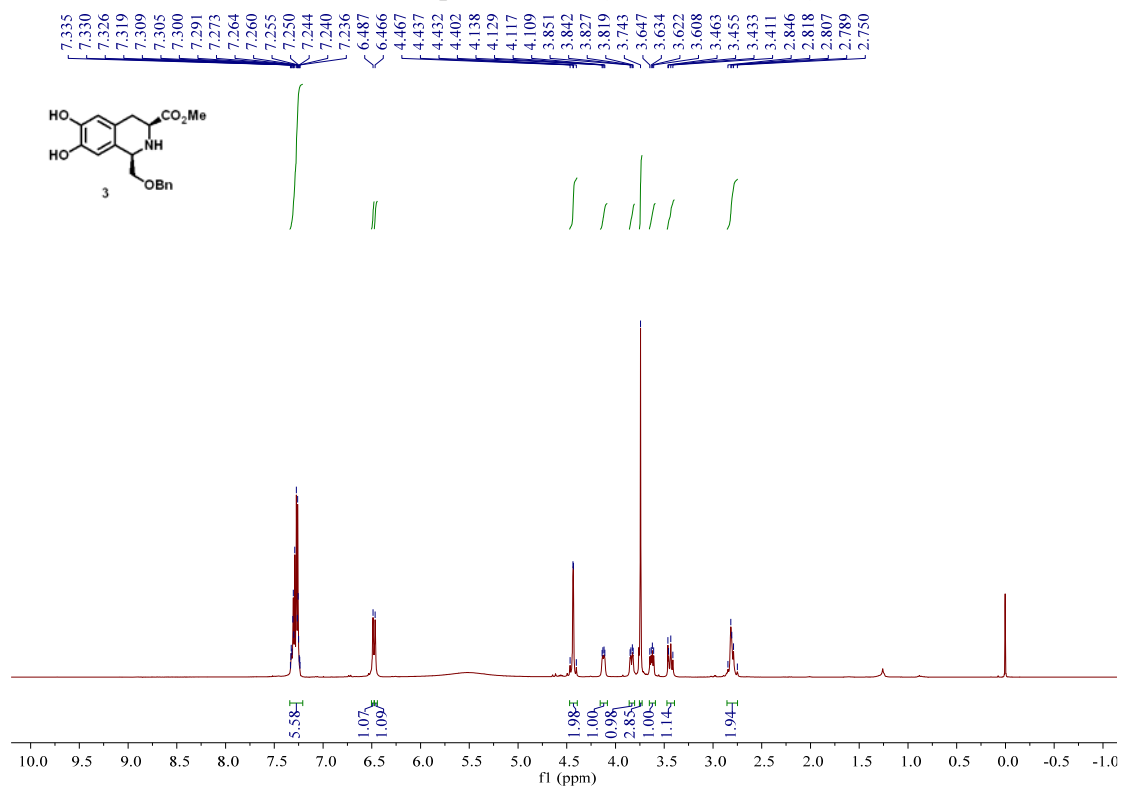

# <sup>13</sup>C NMR Spectrum of 3 (101 MHz, CDCl<sub>3</sub>)

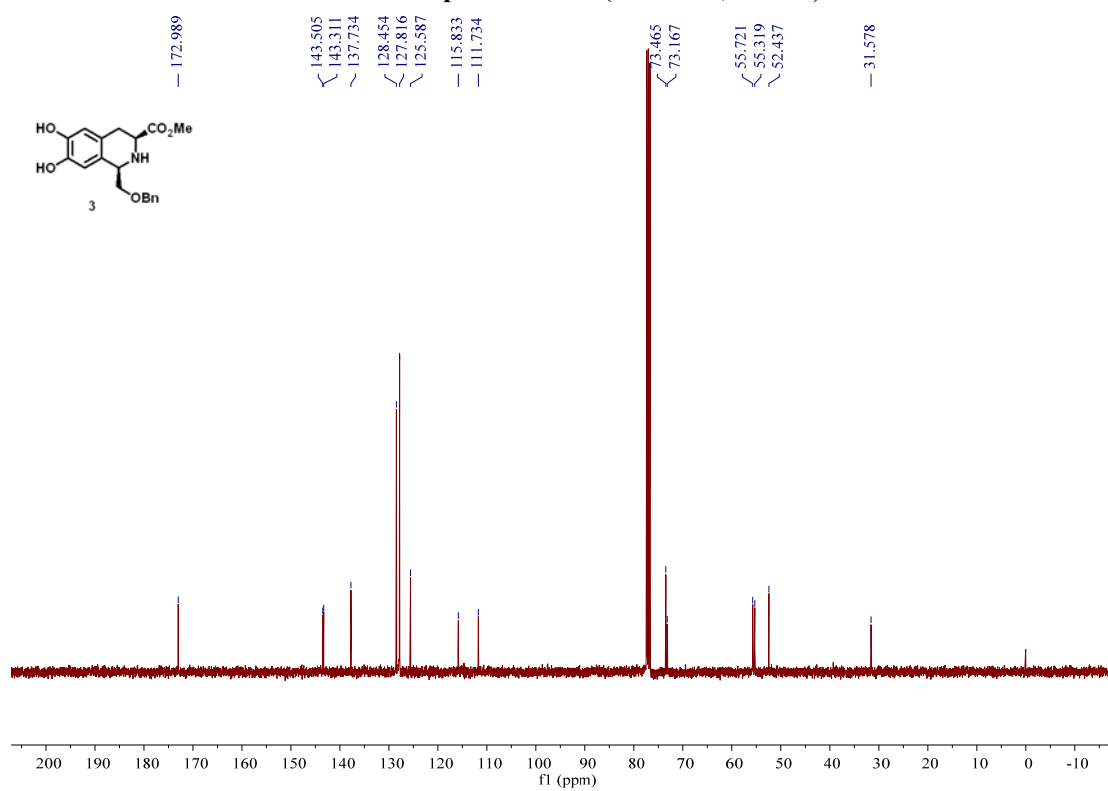



HSQC of 3

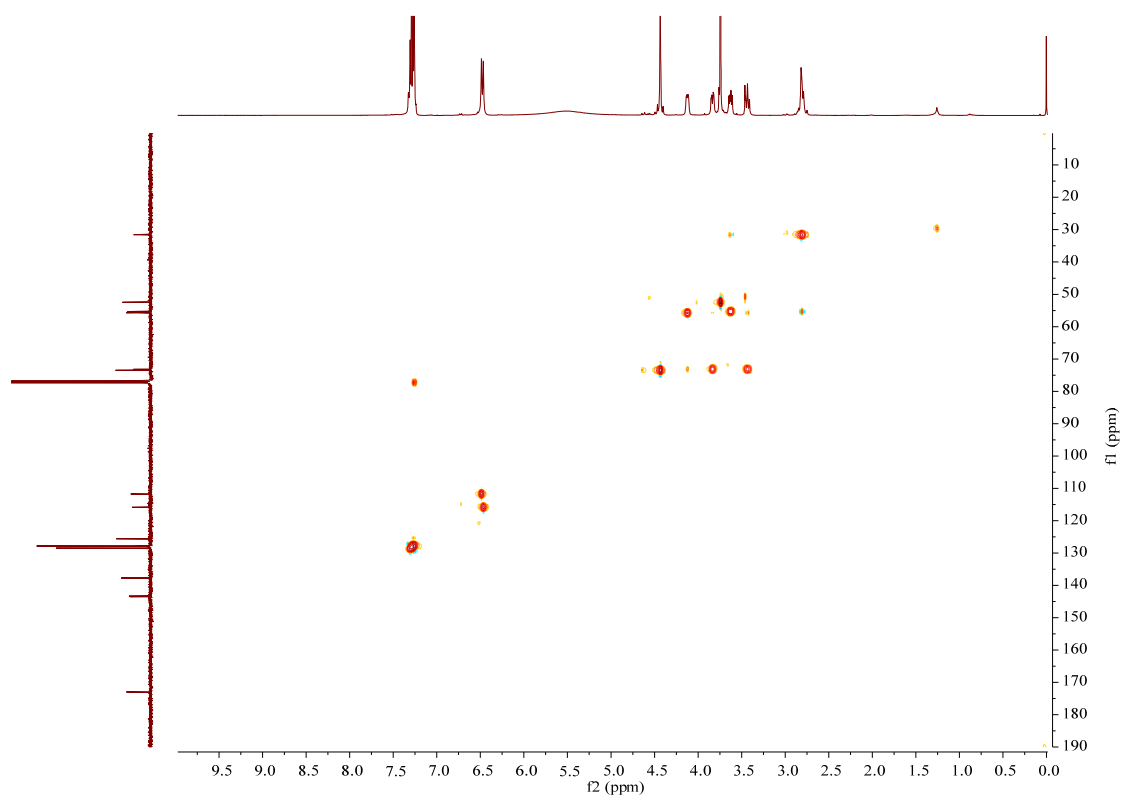

HMBC of 3

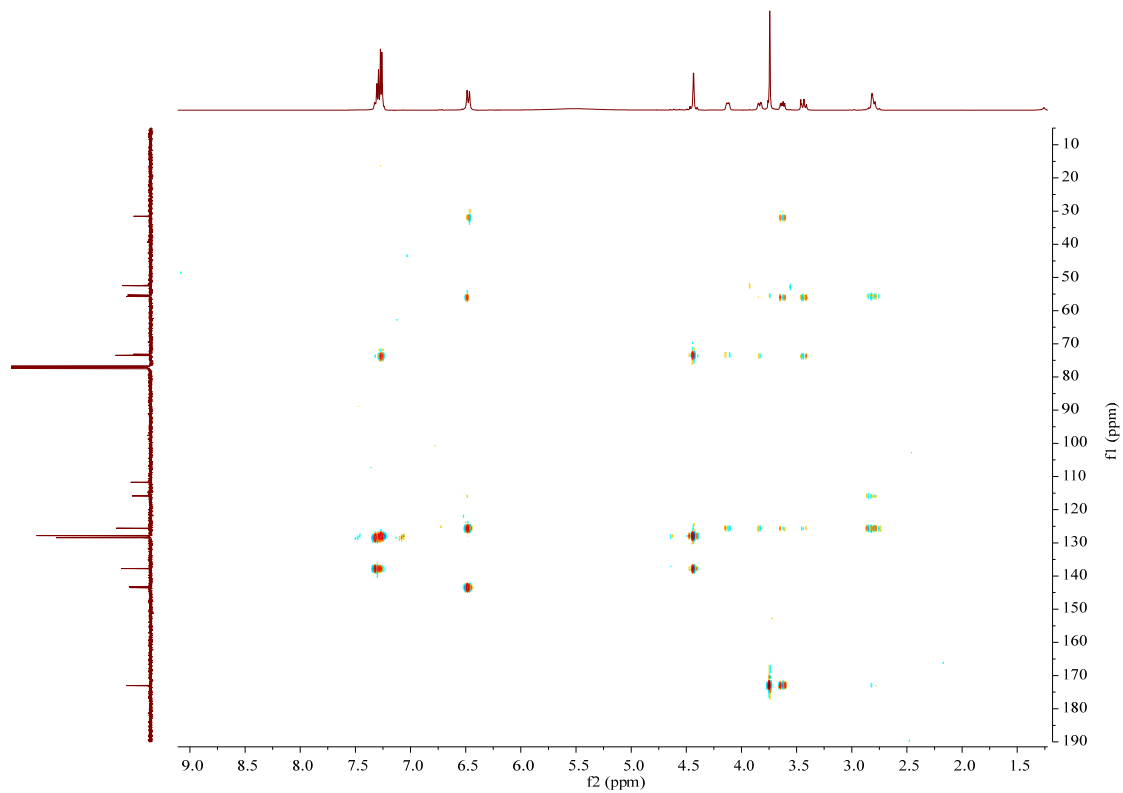

COSY of 3

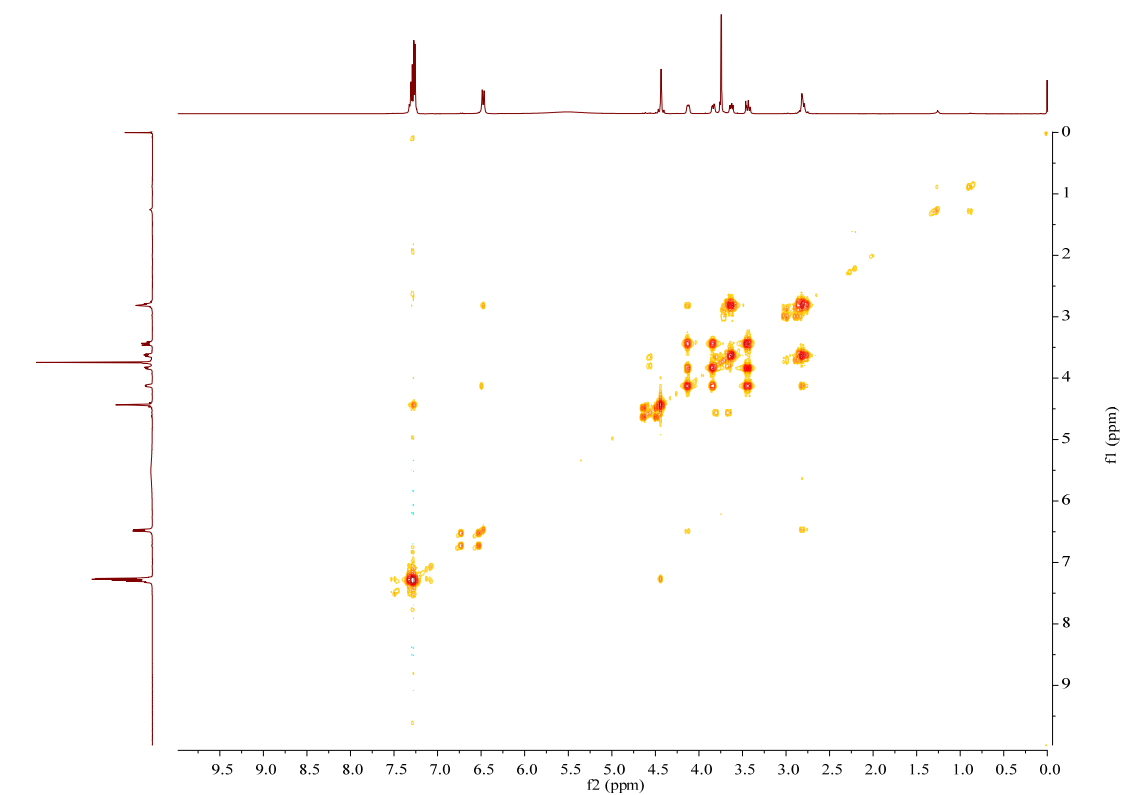

### NOE of 3

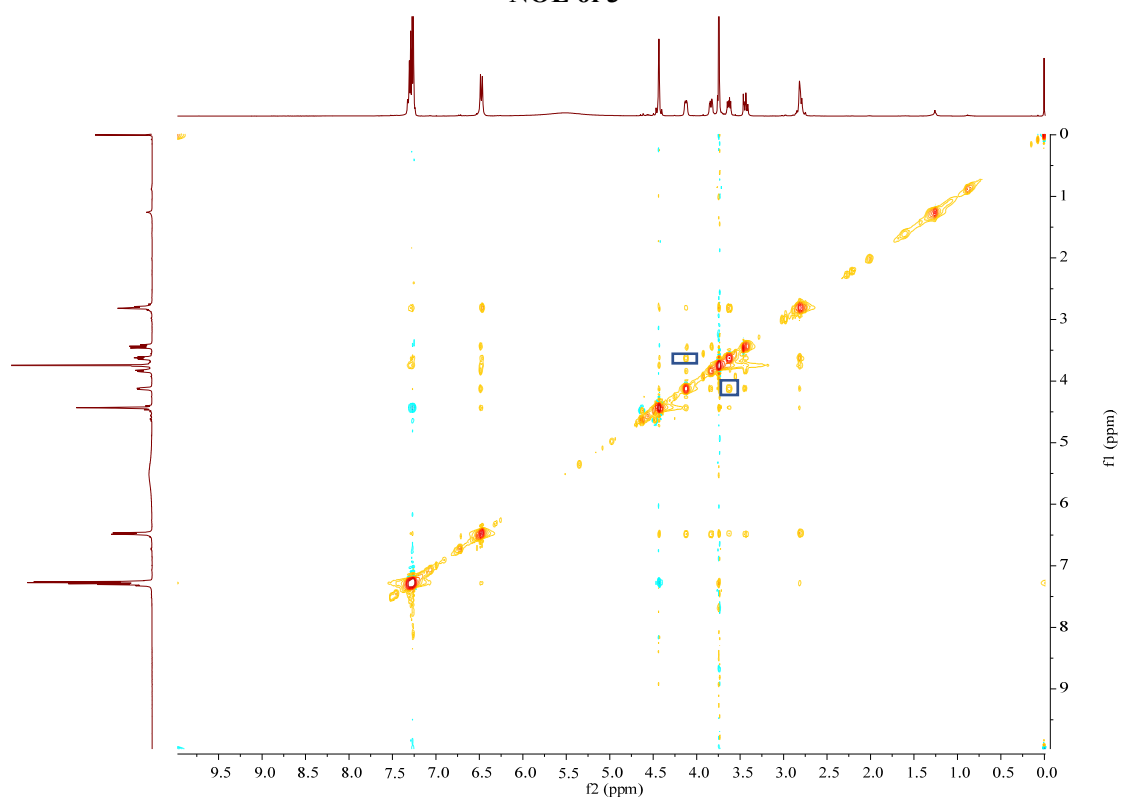

# **<sup>1</sup>H NMR Spectrum of 4 (400 MHz, CDCl<sub>3</sub>)**

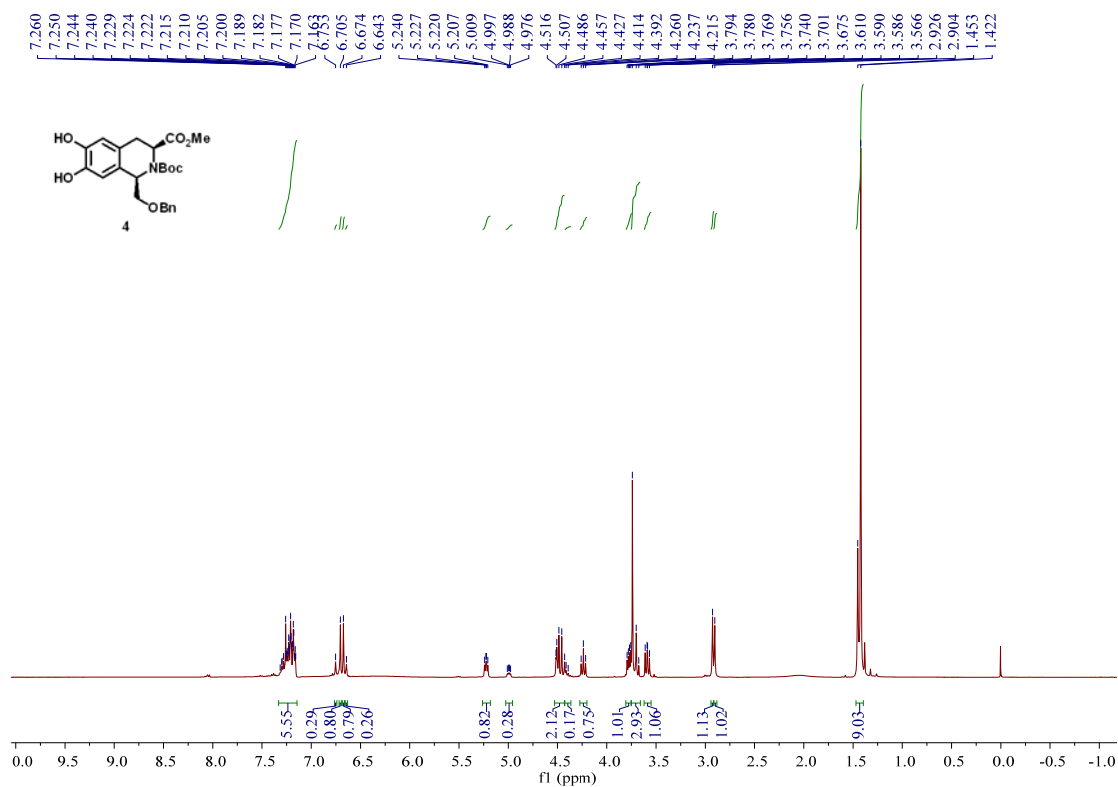

# **<sup>13</sup>C NMR Spectrum of 4 (101 MHz, CDCl<sub>3</sub>)**

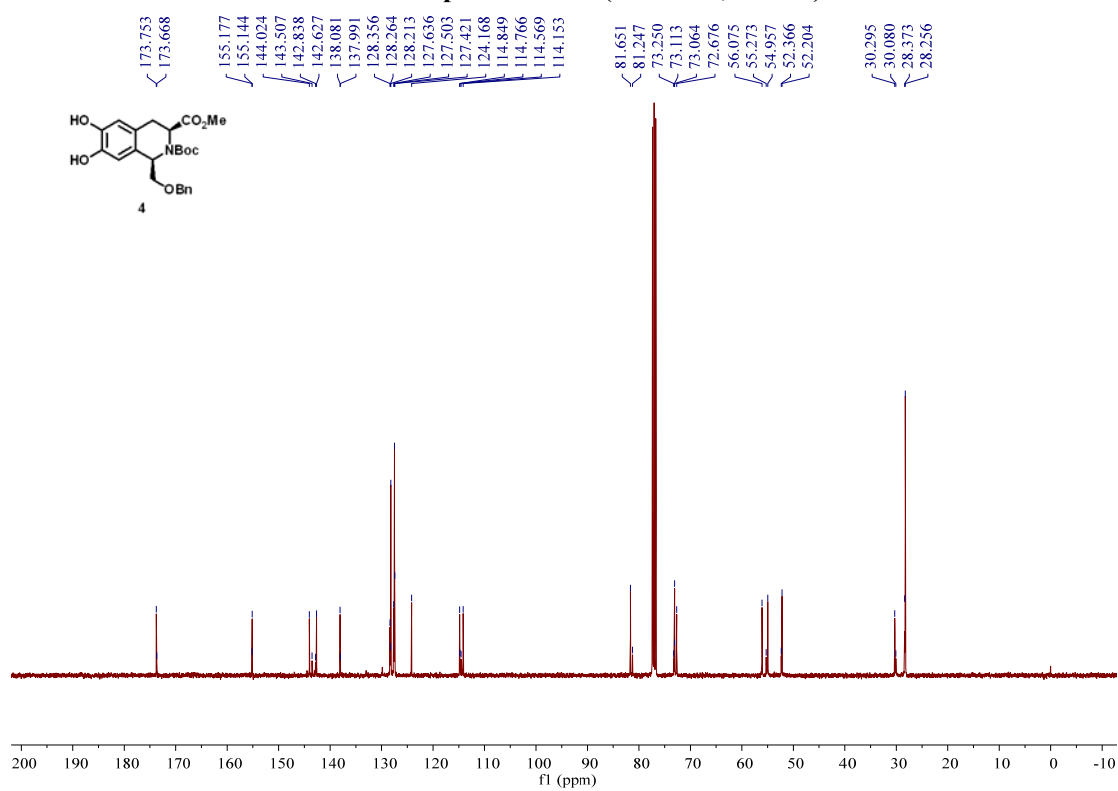

# <sup>1</sup>H NMR Spectrum of 5 (400 MHz, CDCl<sub>3</sub>)

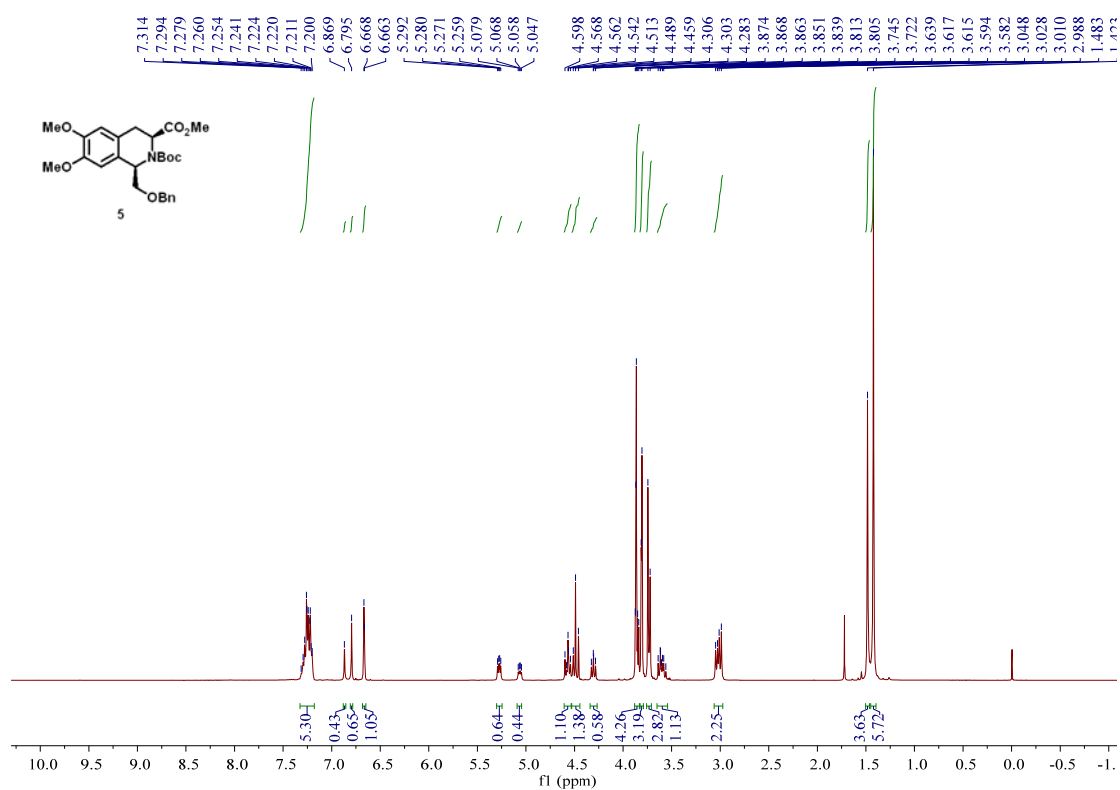

# <sup>13</sup>C NMR Spectrum of 5 (101 MHz, CDCl<sub>3</sub>)

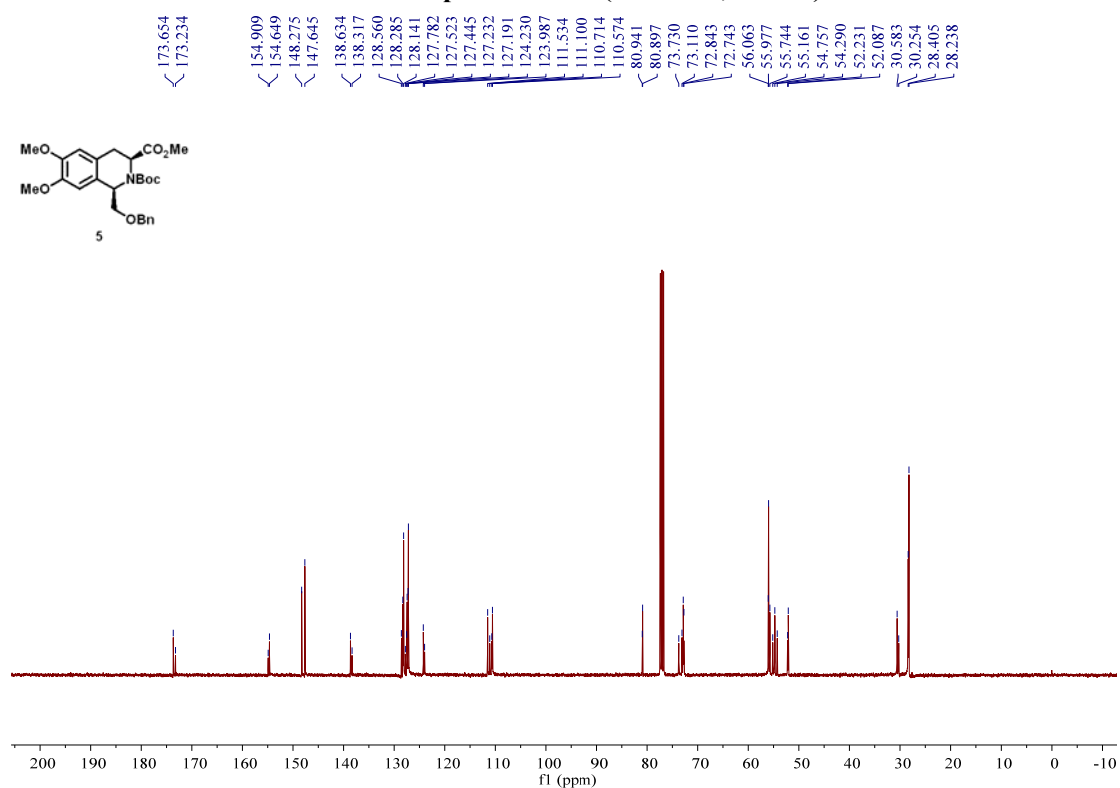

# <sup>1</sup>H NMR Spectrum of 6 (400 MHz, CDCl<sub>3</sub>)

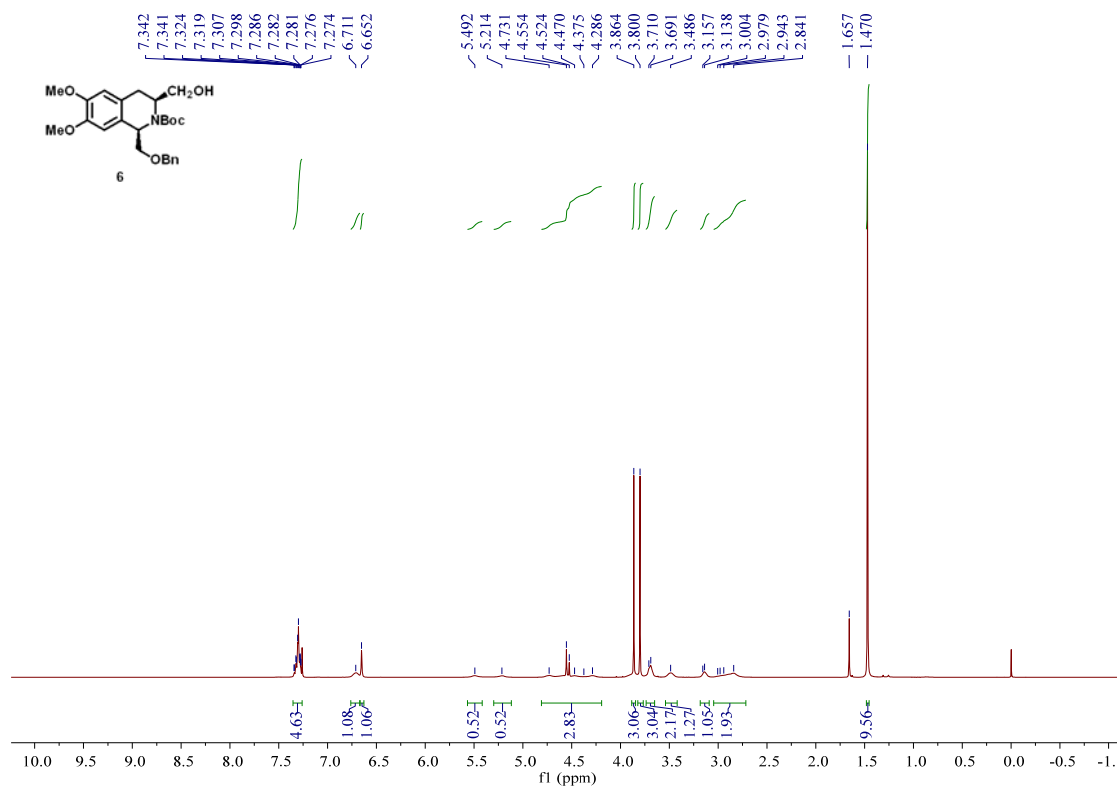

# <sup>13</sup>C NMR Spectrum of 6 (101 MHz, CDCl<sub>3</sub>)

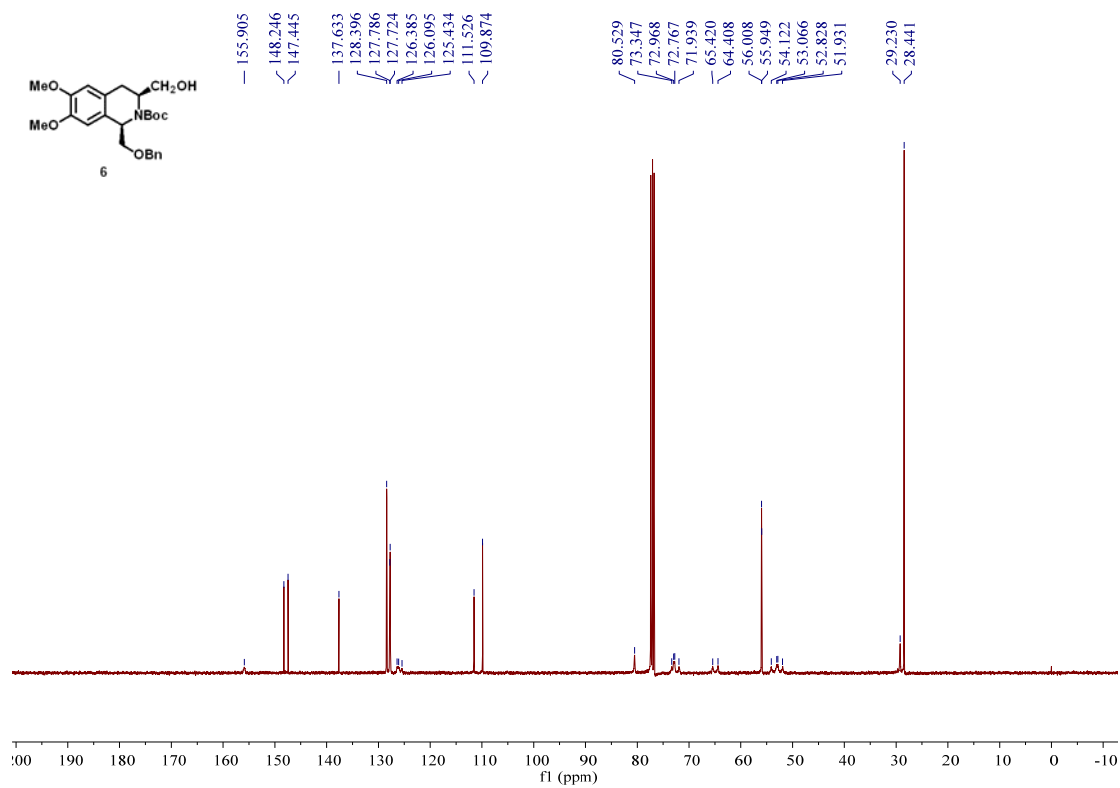

**<sup>1</sup>H NMR Spectrum of 7 (400 MHz, CDCl<sub>3</sub>)**

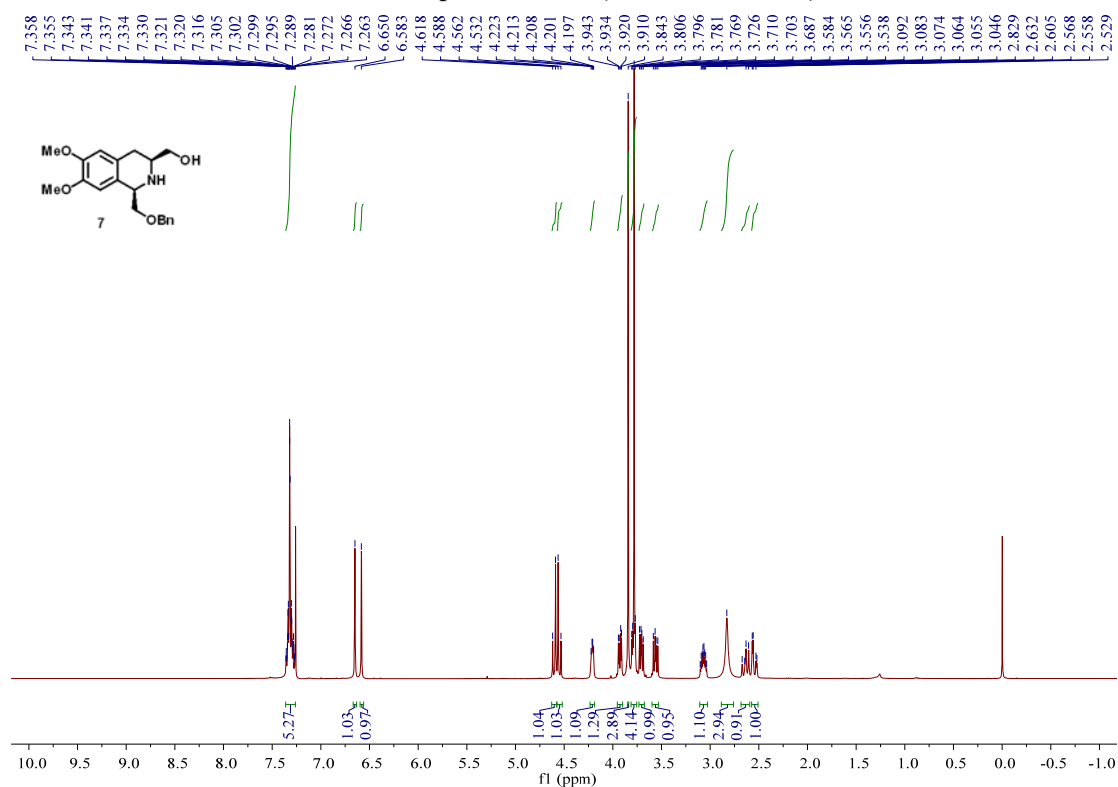

**<sup>13</sup>C NMR Spectrum of 7 (101 MHz, CDCl<sub>3</sub>)**

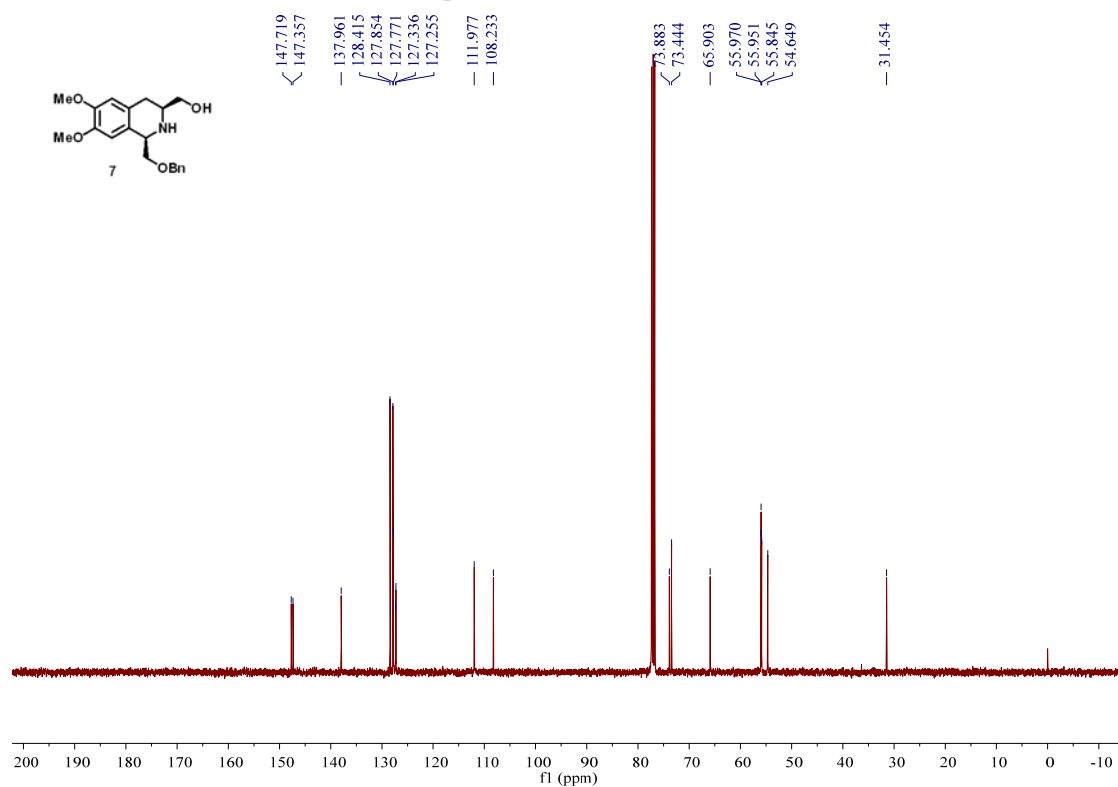

**<sup>1</sup>H NMR Spectrum of 9 (400 MHz, CDCl<sub>3</sub>)**

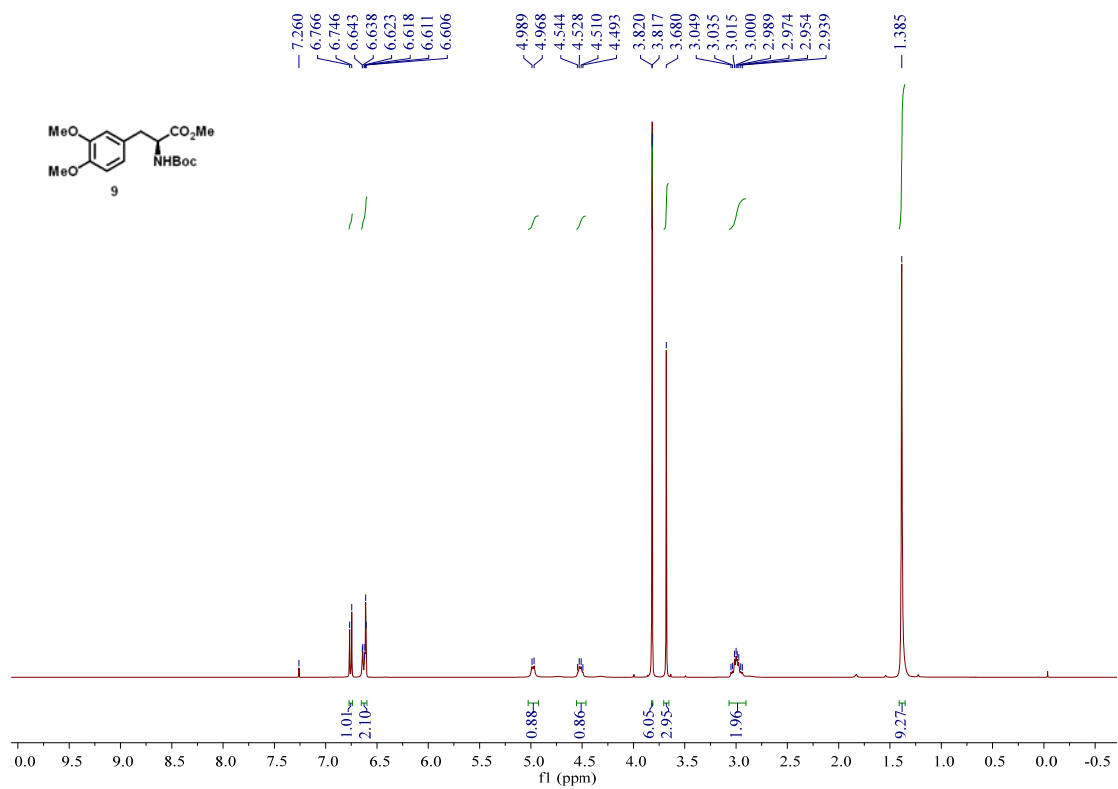

**<sup>1</sup>H NMR Spectrum of 10 (400 MHz, CDCl<sub>3</sub>)**

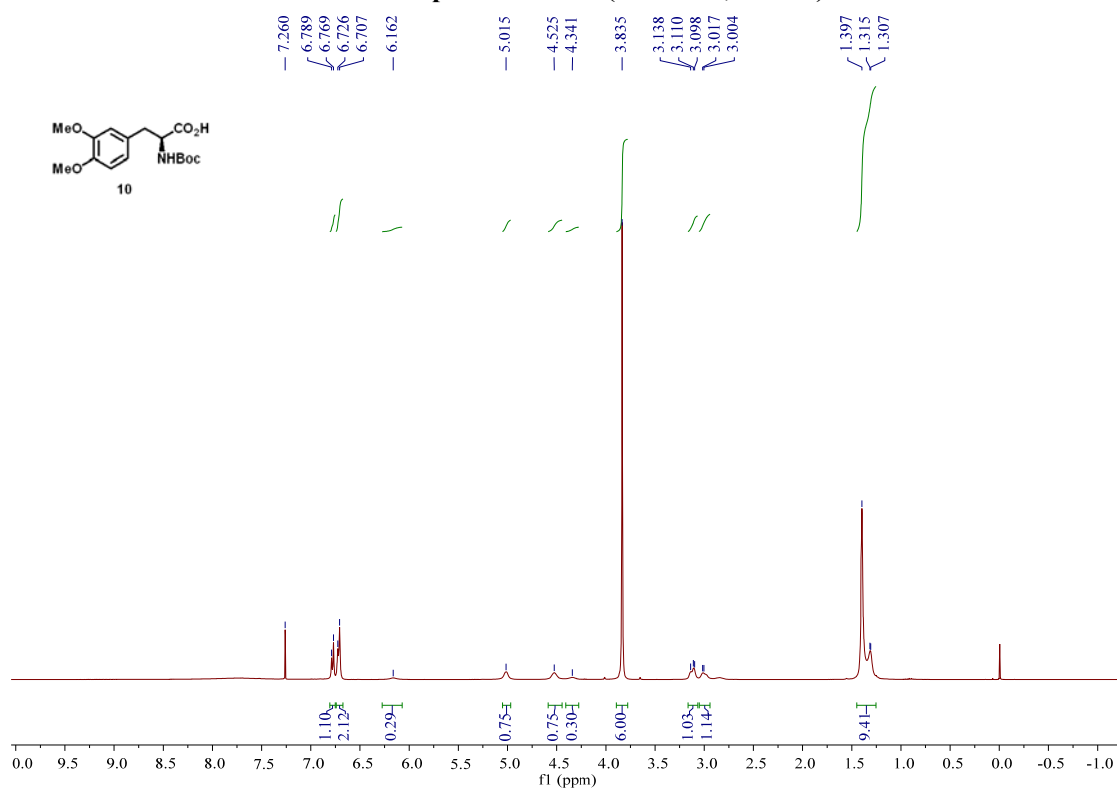

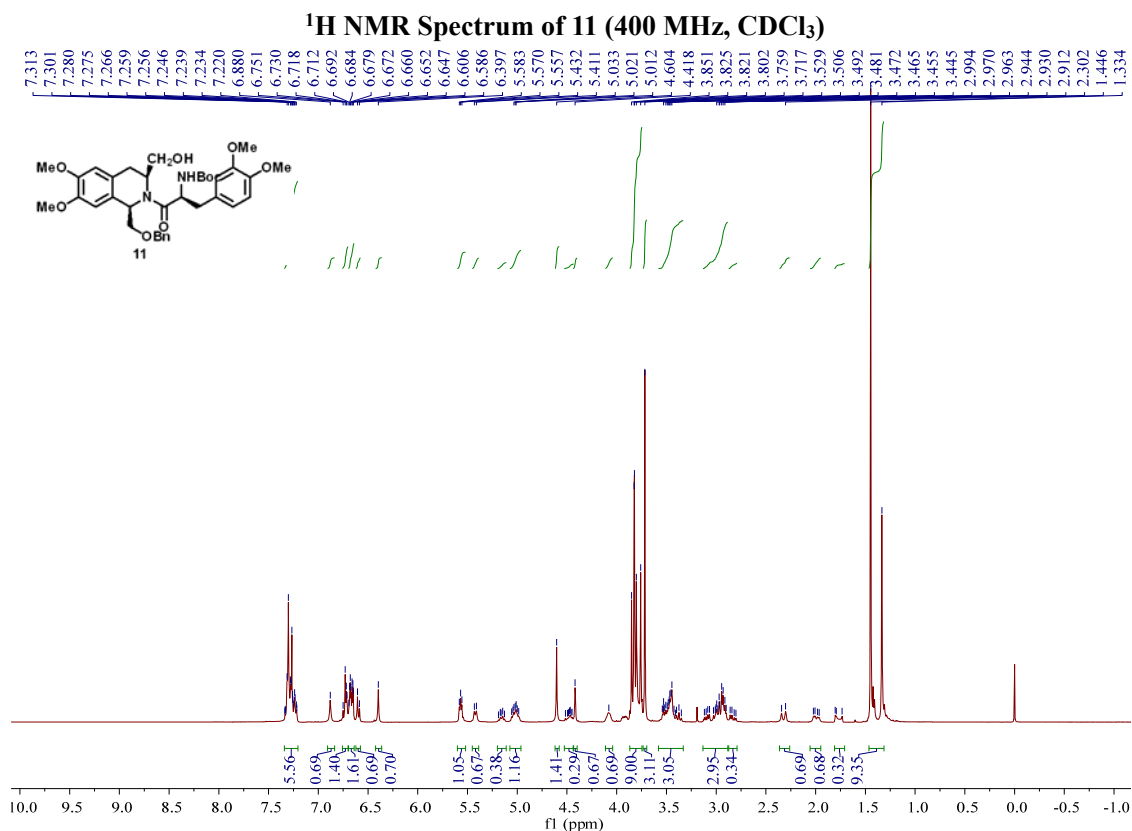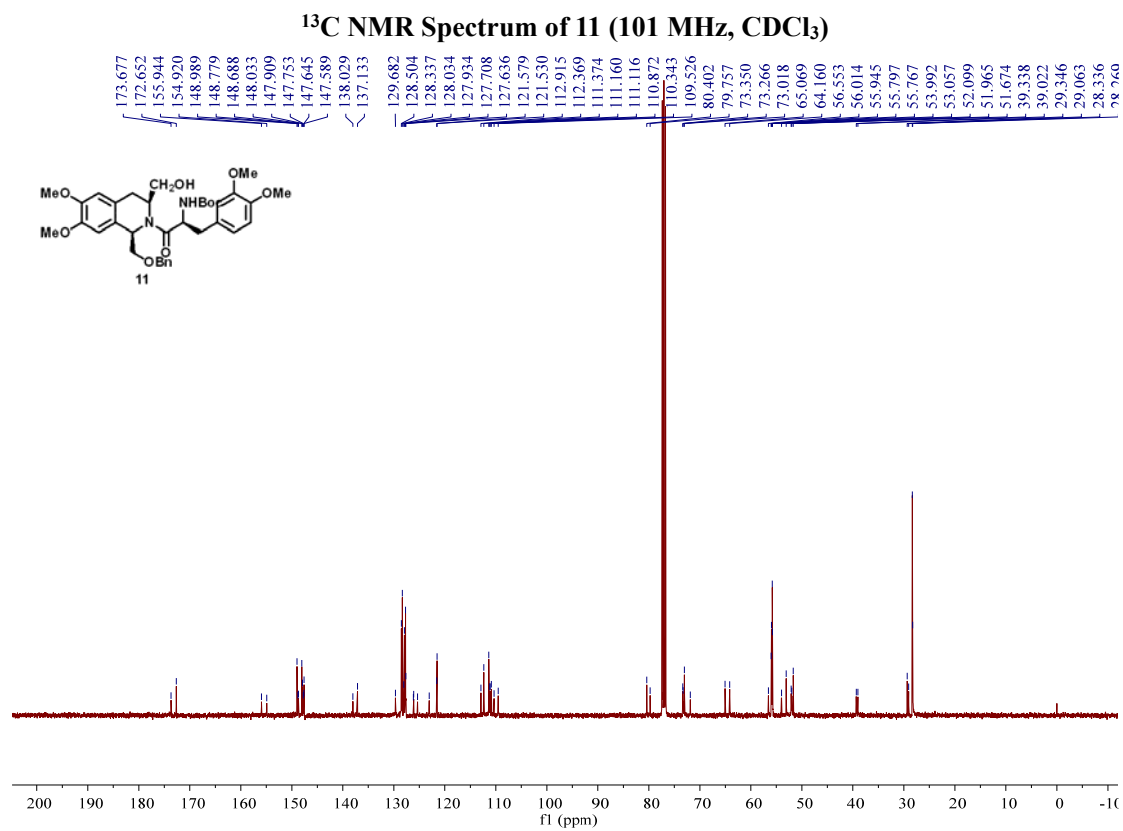



**$^1\text{H}$  NMR Spectrum of 12 (400 MHz,  $\text{CDCl}_3$ )**

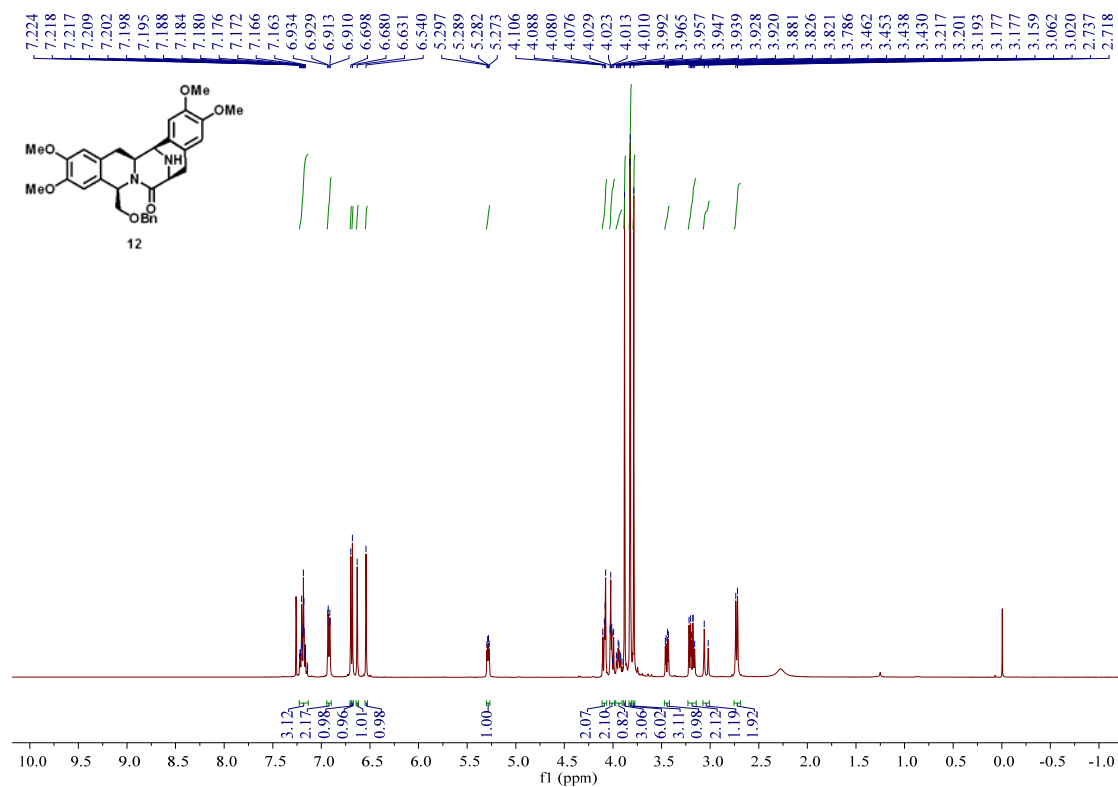

**$^{13}\text{C}$  NMR Spectrum of 12 (101 MHz,  $\text{CDCl}_3$ )**

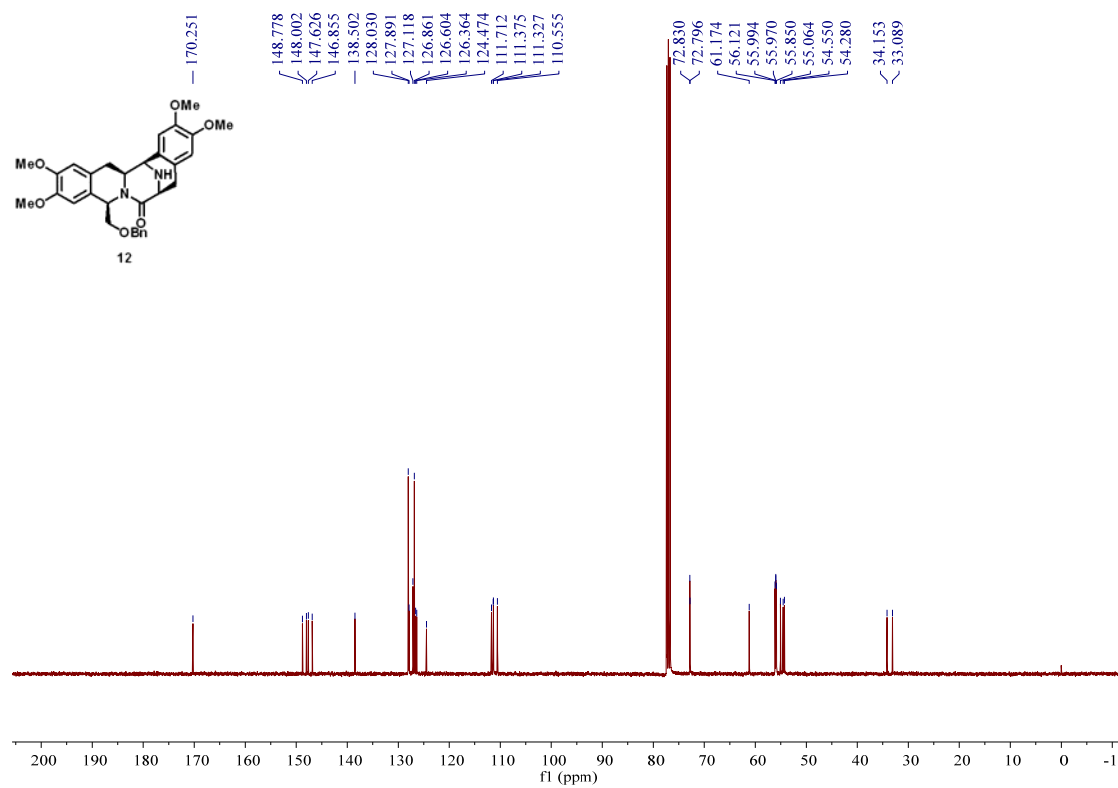

**<sup>1</sup>H NMR Spectrum of 13 (400 MHz, CDCl<sub>3</sub>)**

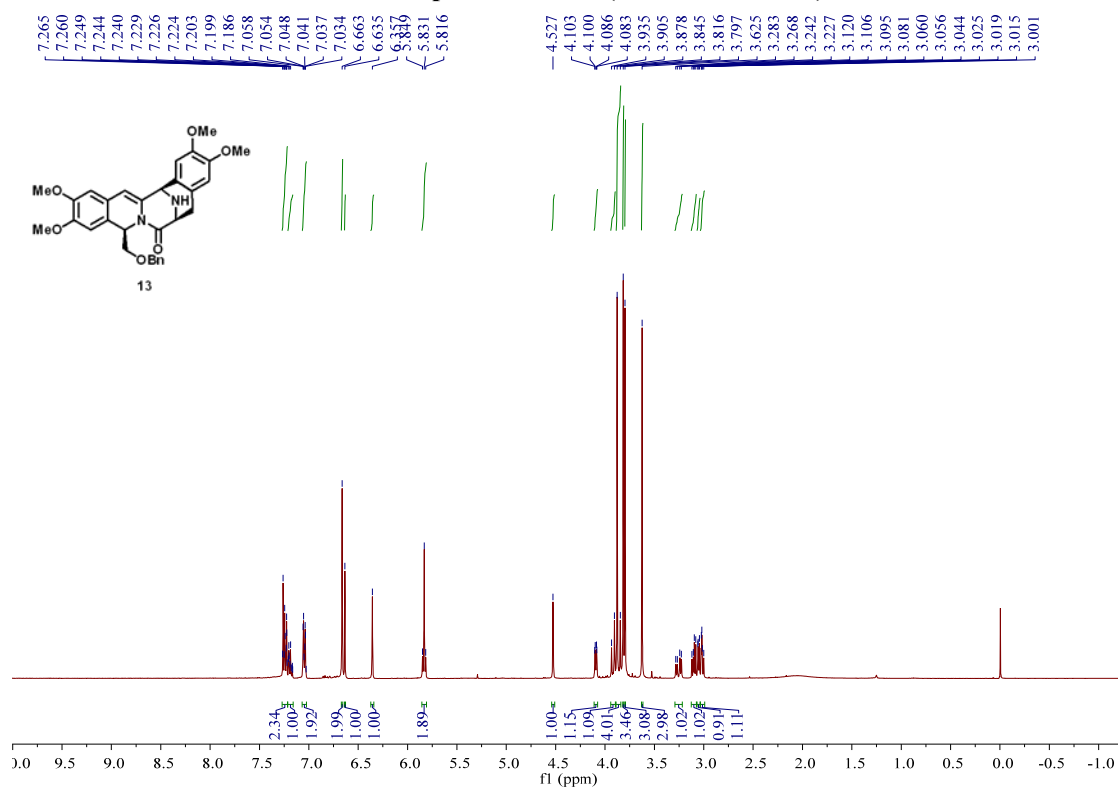

**<sup>13</sup>C NMR Spectrum of 13 (101 MHz, CDCl<sub>3</sub>)**

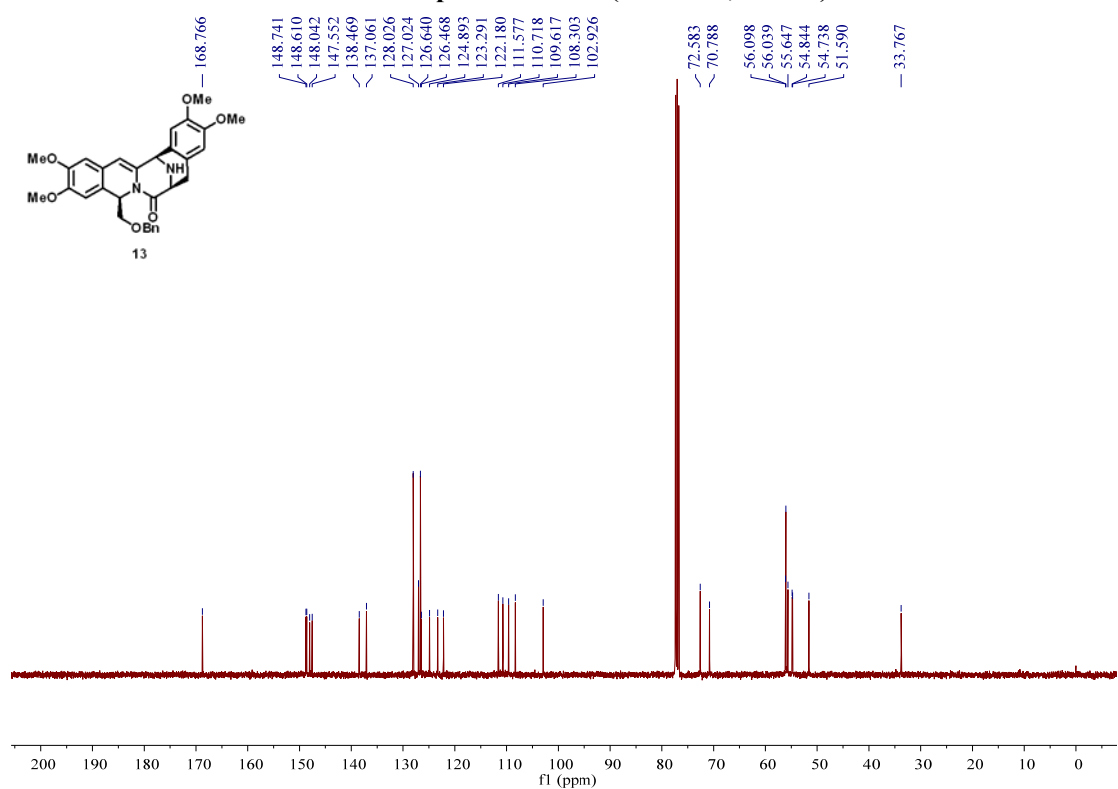

**<sup>1</sup>H NMR Spectrum of 14 (400 MHz, CDCl<sub>3</sub>)**

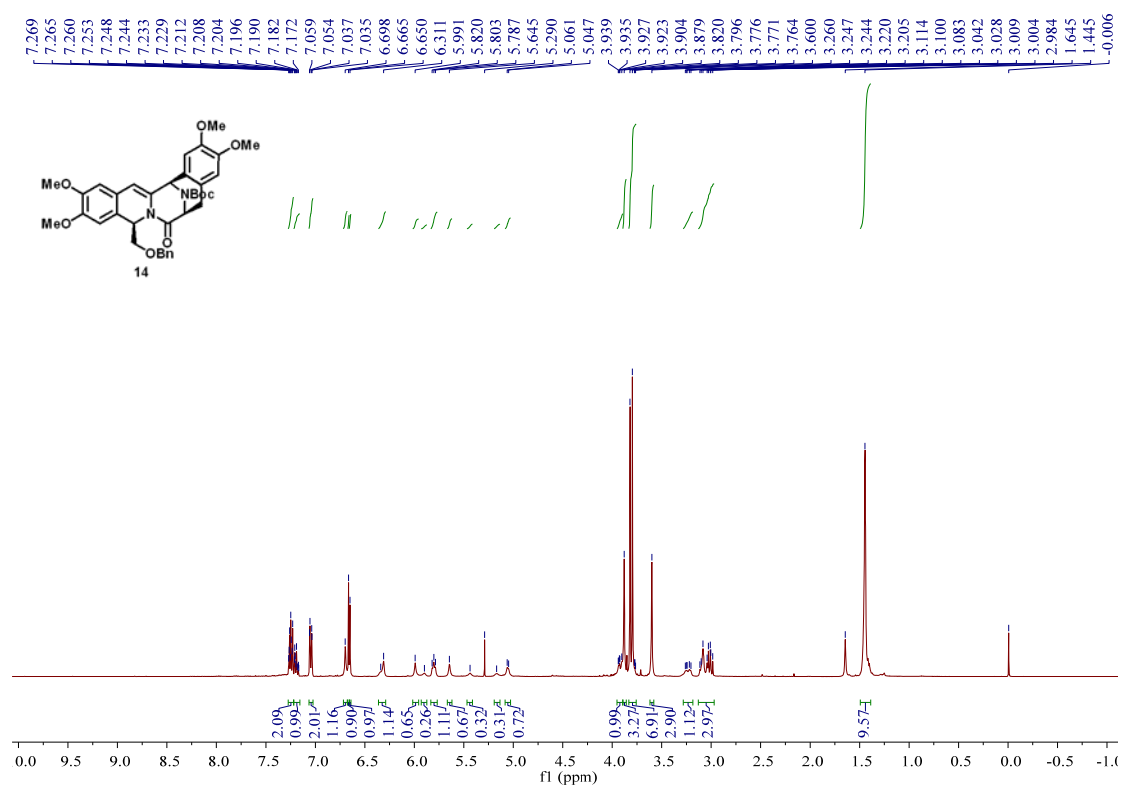

**<sup>13</sup>C NMR Spectrum of 14 (101 MHz, CDCl<sub>3</sub>)**

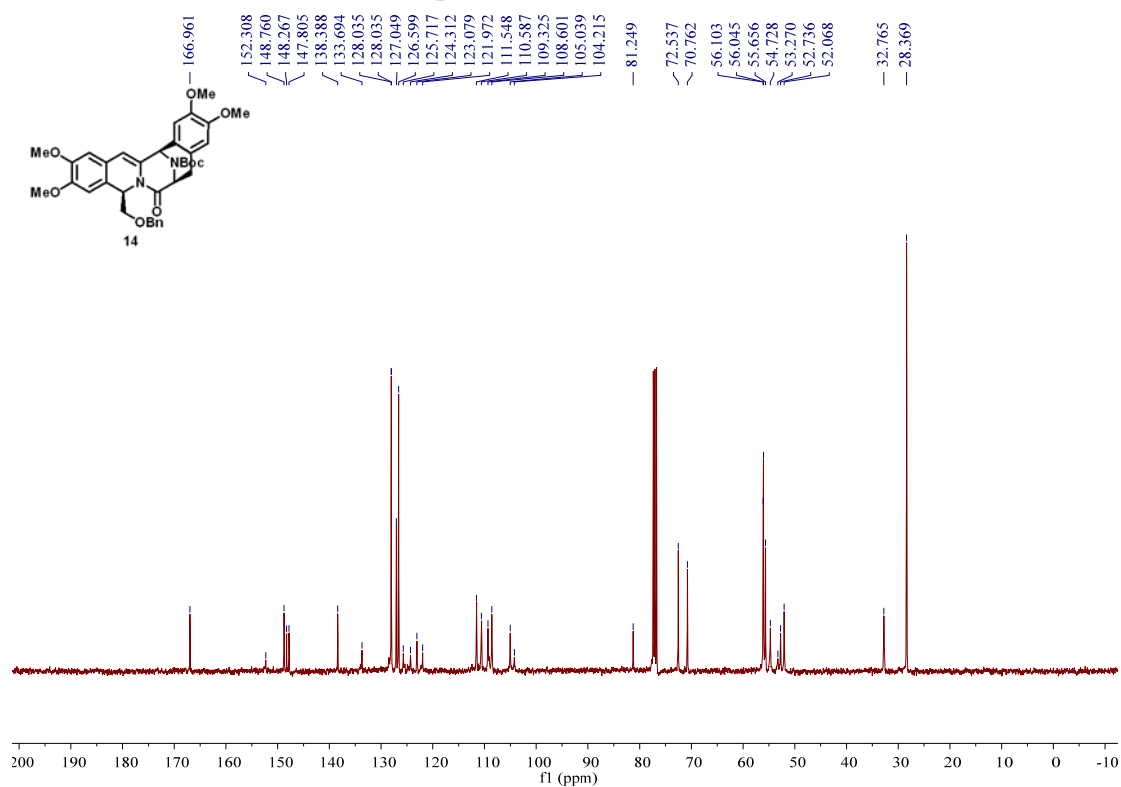

# <sup>1</sup>H NMR Spectrum of 15 (400 MHz, CDCl<sub>3</sub>)

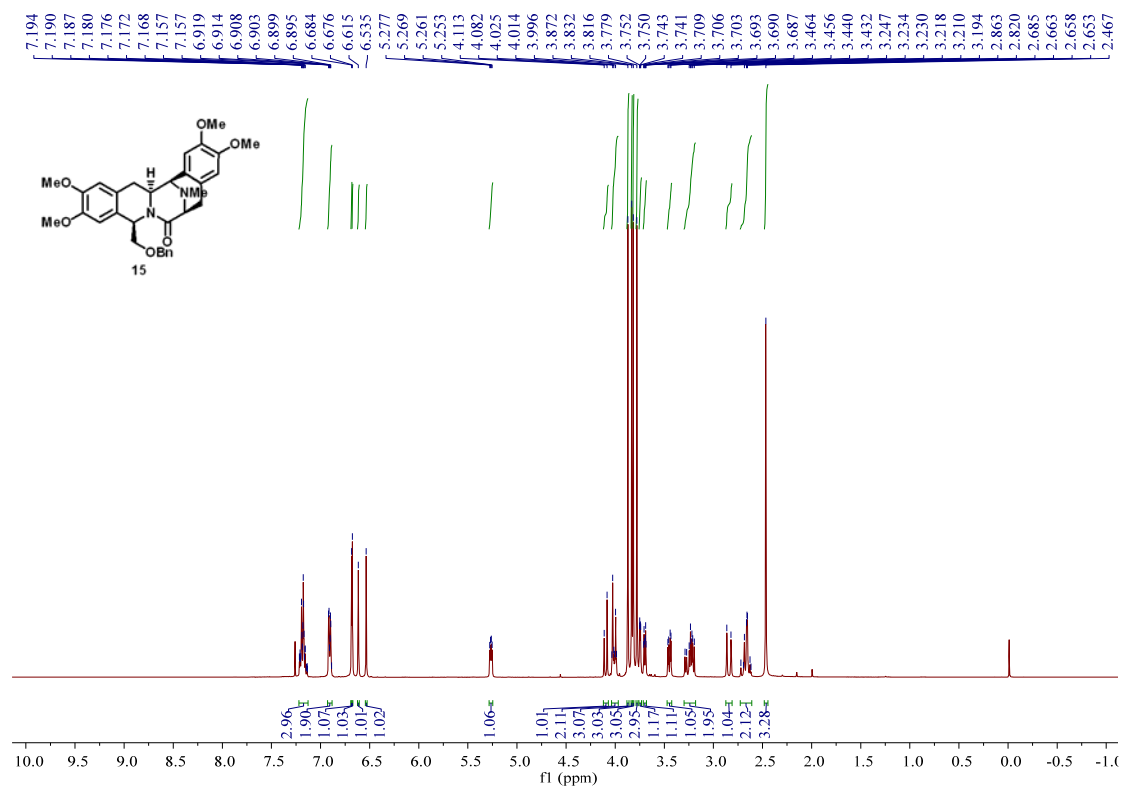

# <sup>13</sup>C NMR Spectrum of 15 (101 MHz, CDCl<sub>3</sub>)

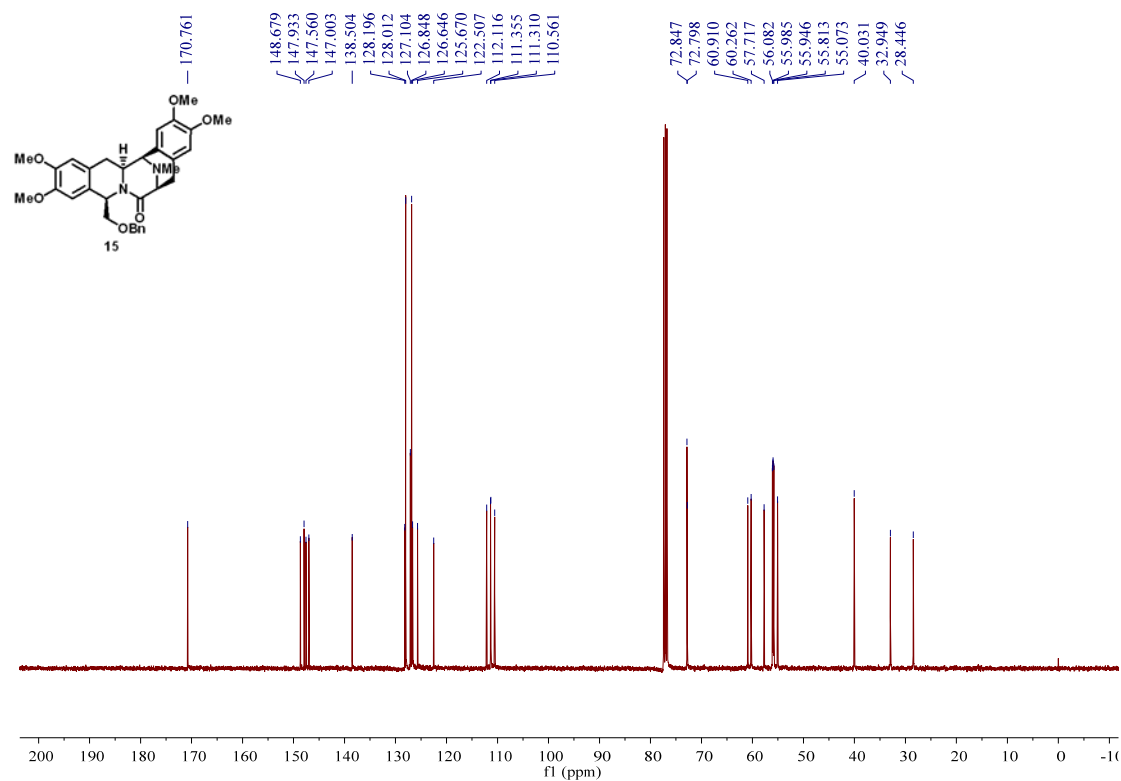

**<sup>1</sup>H NMR Spectrum of 16 (400 MHz, CDCl<sub>3</sub>)**

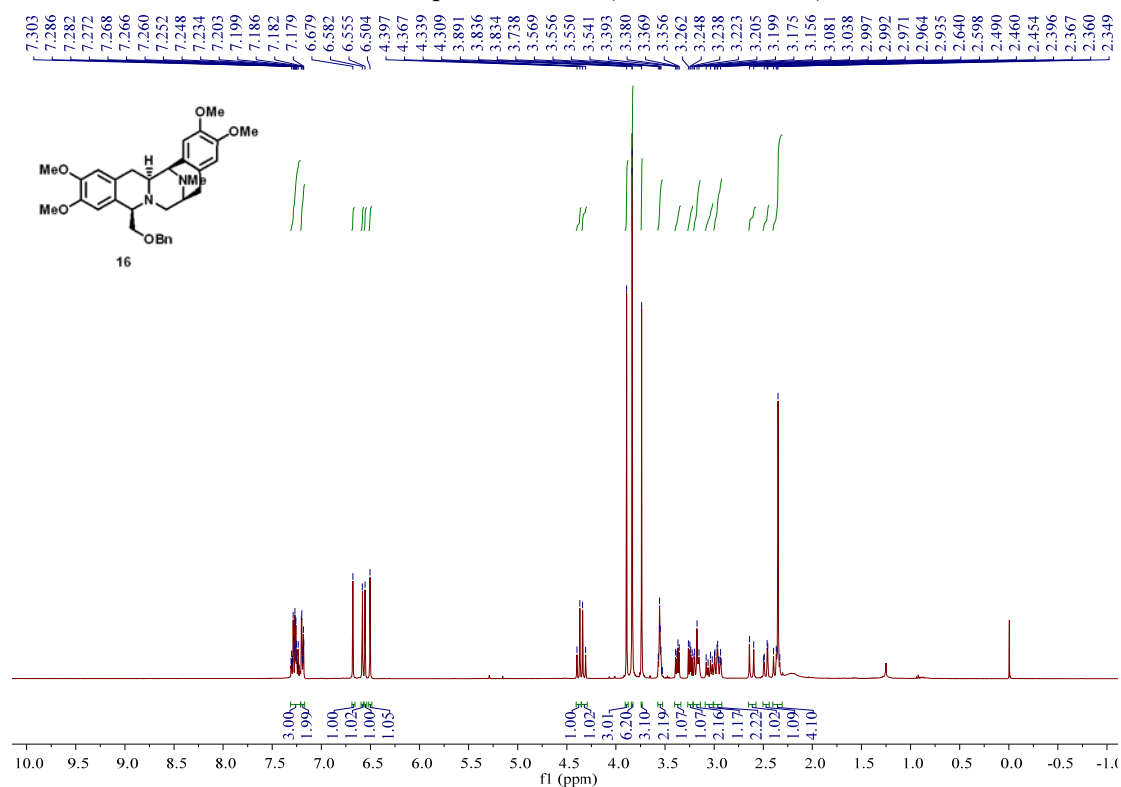

**<sup>13</sup>C NMR Spectrum of 16 (101 MHz, CDCl<sub>3</sub>)**

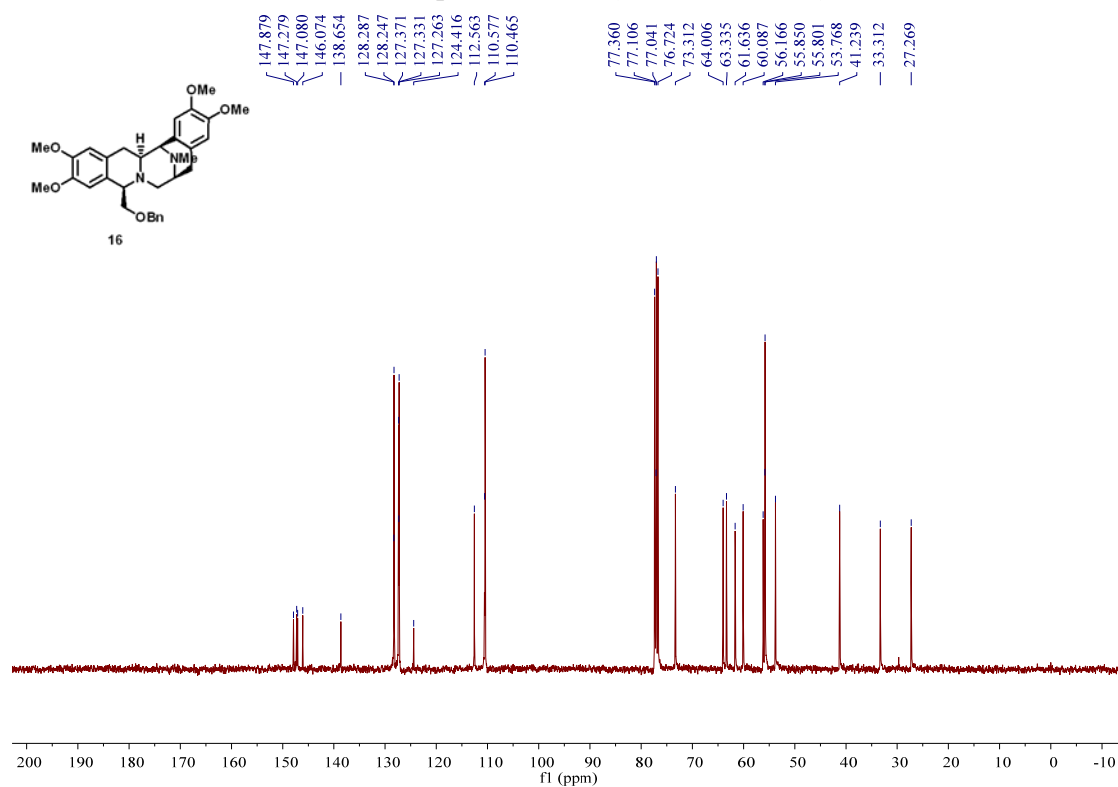

# <sup>1</sup>H NMR Spectrum of 17 (400 MHz, CDCl<sub>3</sub>)

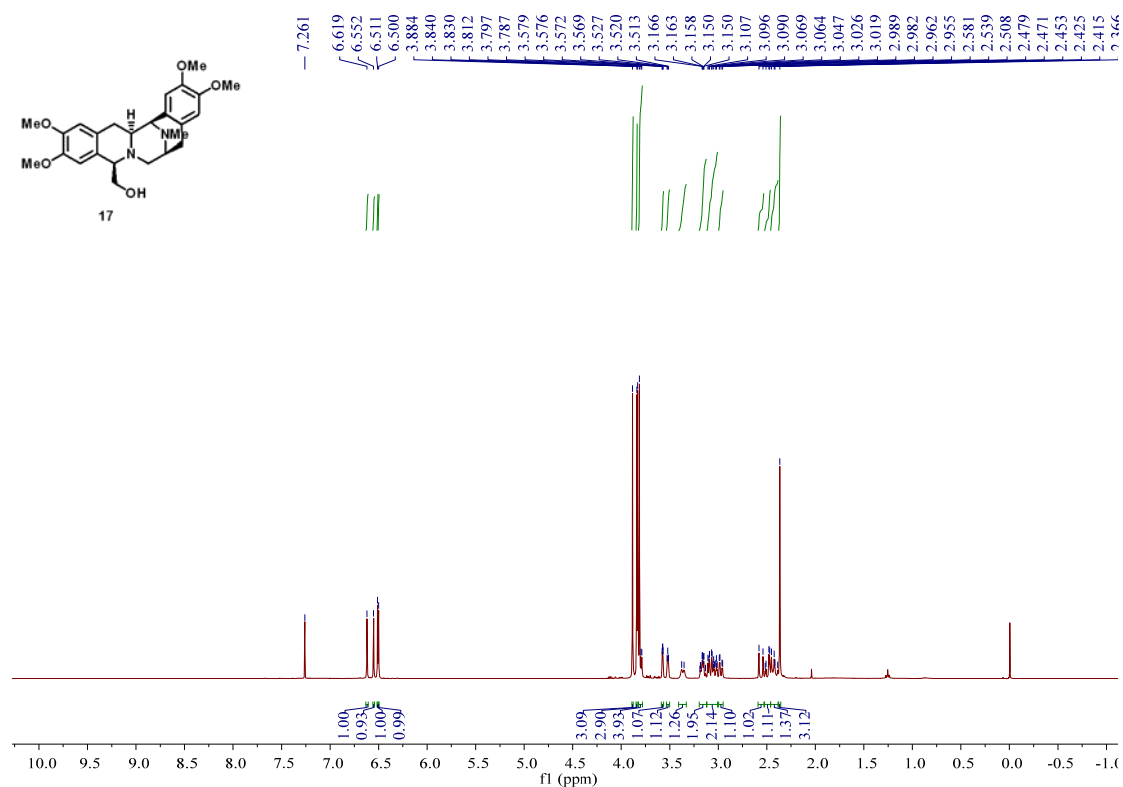

## <sup>13</sup>C NMR Spectrum of 17 (101 MHz, CDCl<sub>3</sub>)

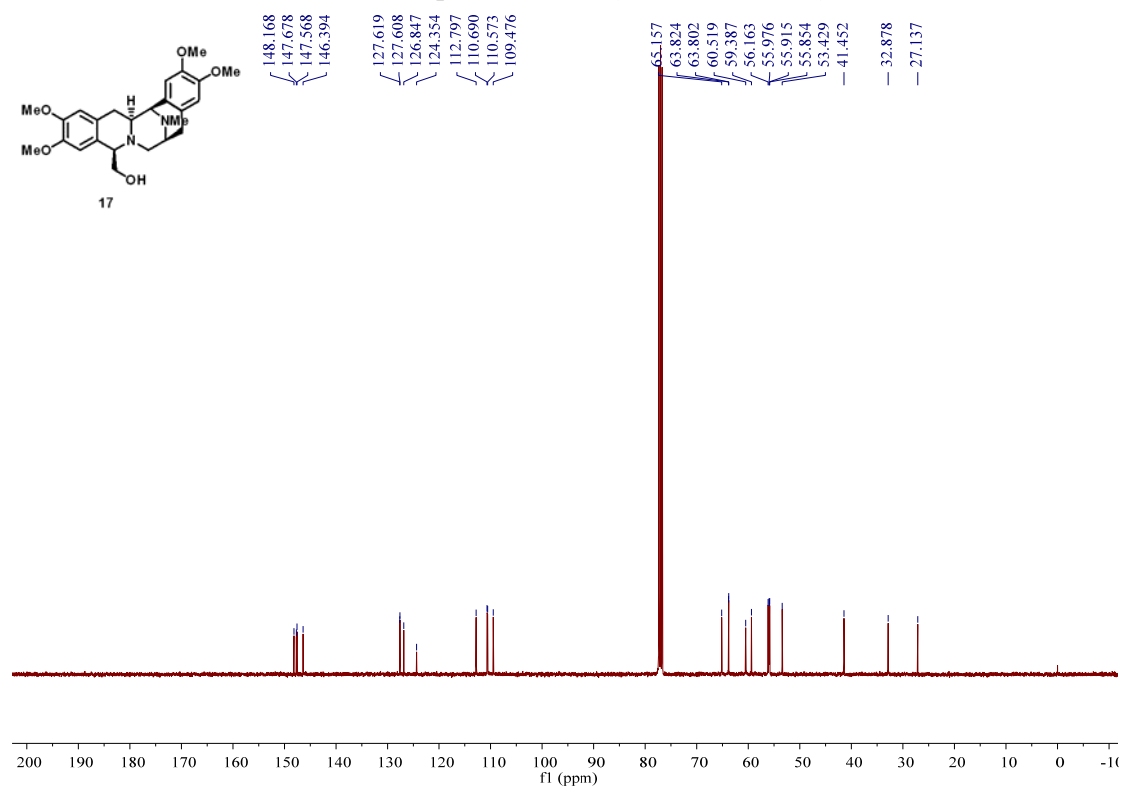

**<sup>1</sup>H NMR Spectrum of 18 (400 MHz, CDCl<sub>3</sub>)**

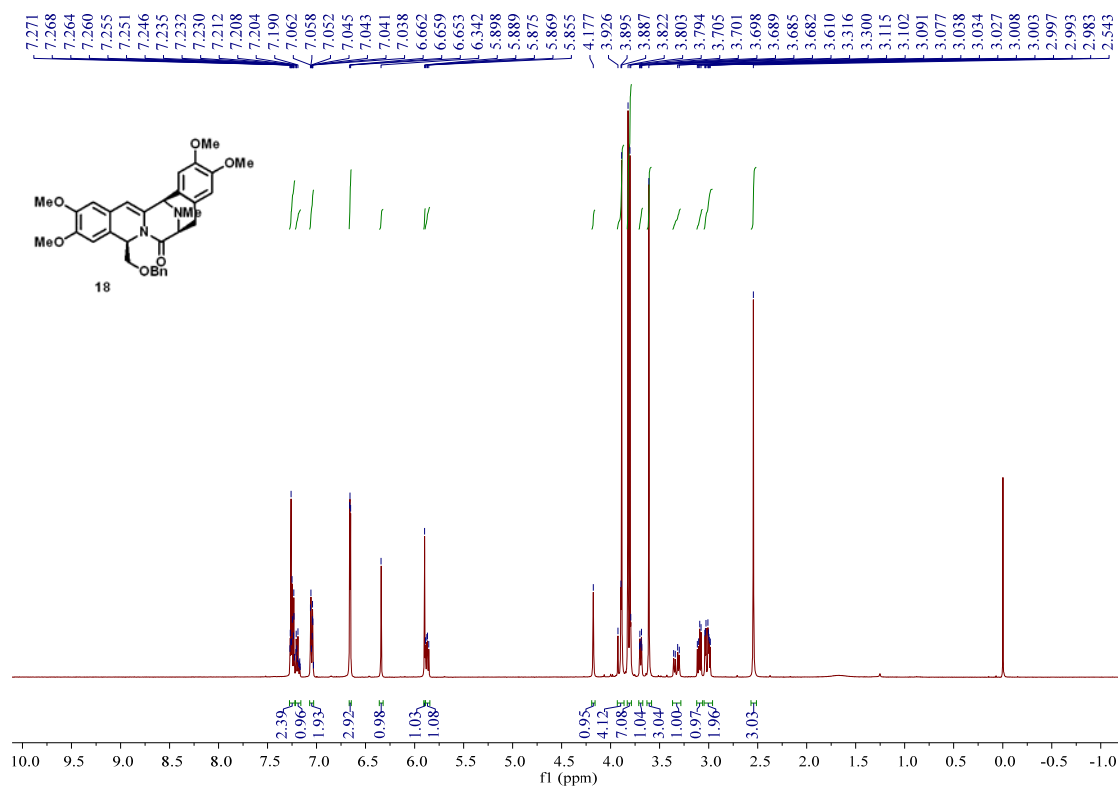

**<sup>13</sup>C NMR Spectrum of 18 (101 MHz, CDCl<sub>3</sub>)**

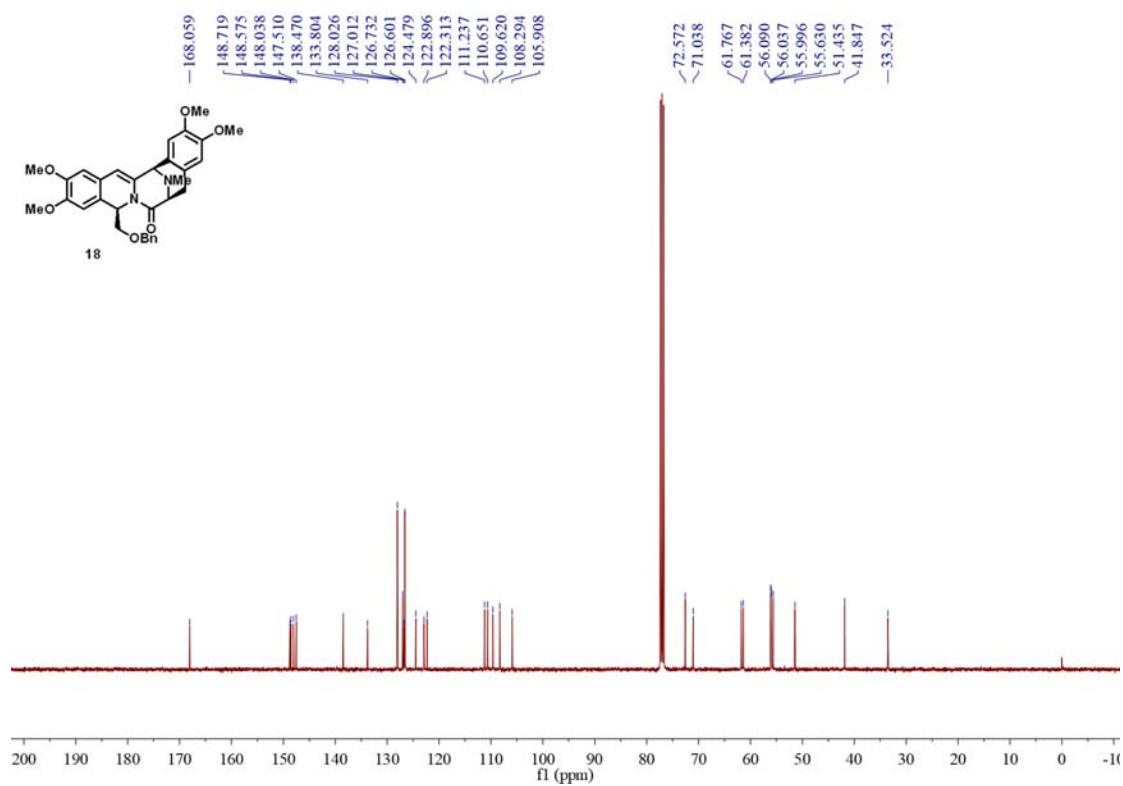

# <sup>1</sup>H NMR Spectrum of 19 (400 MHz, CDCl<sub>3</sub>)

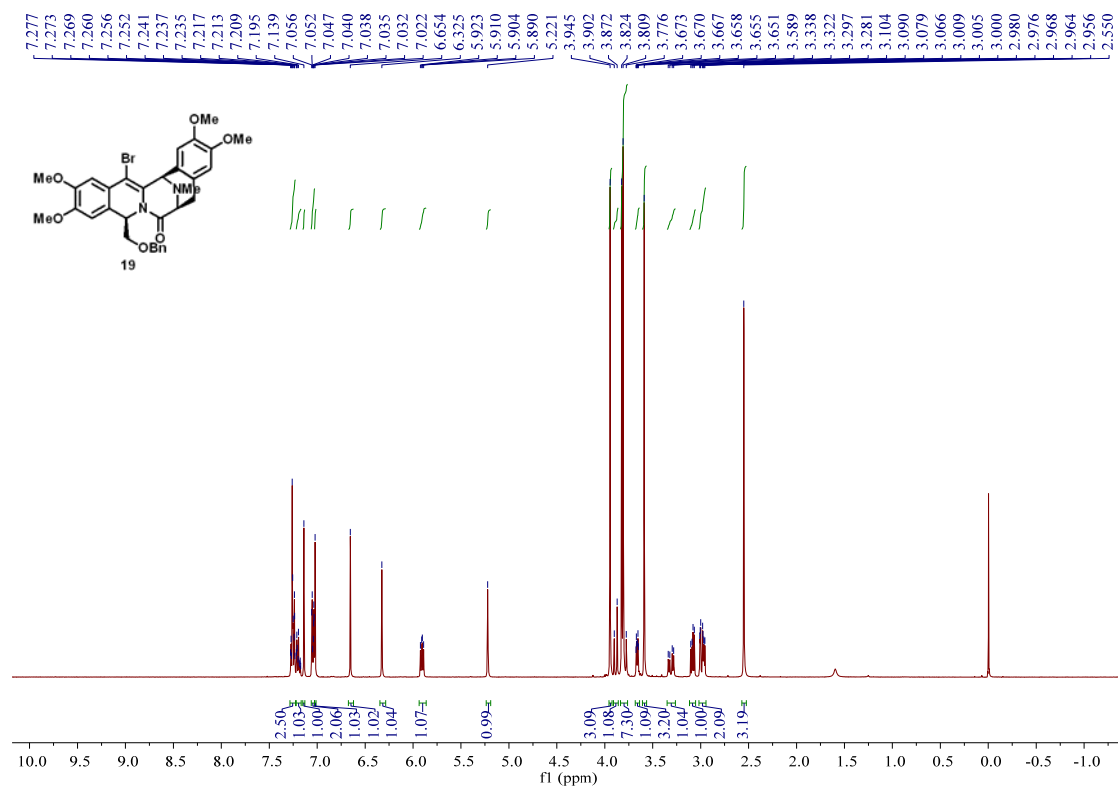

# <sup>13</sup>C NMR Spectrum of 19 (101 MHz, CDCl<sub>3</sub>)

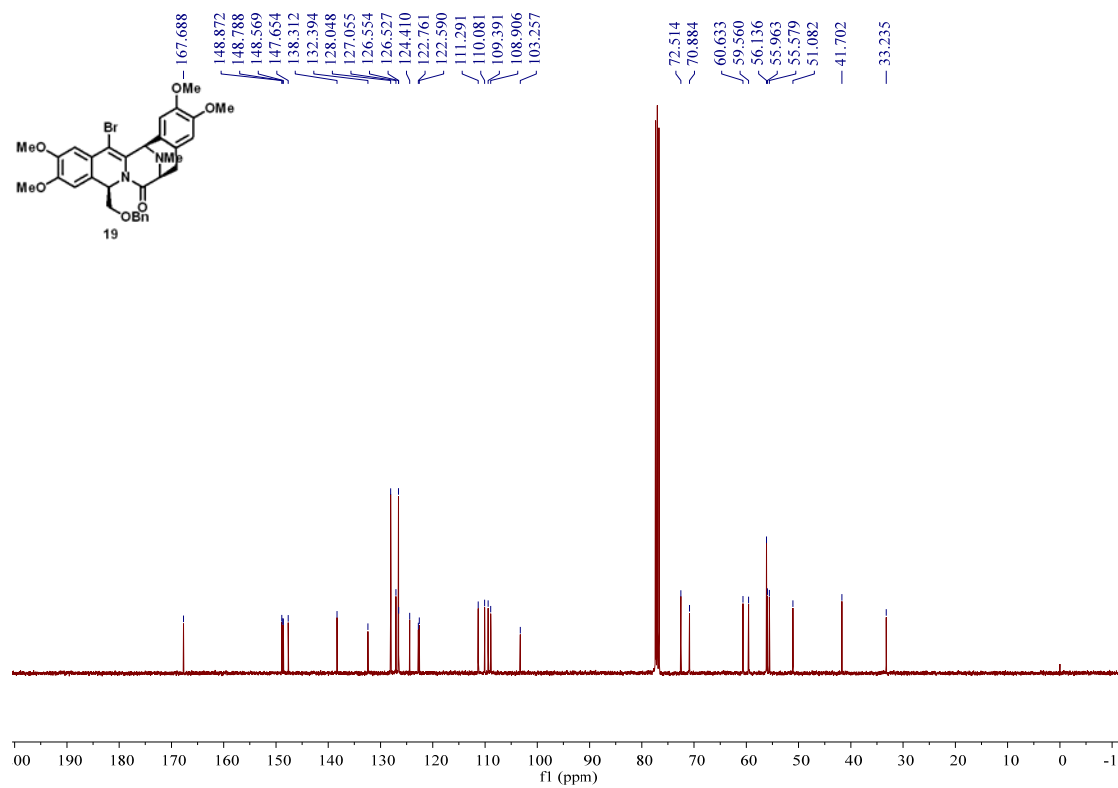



**<sup>1</sup>H NMR Spectrum of 20 (400 MHz, CDCl<sub>3</sub>)**

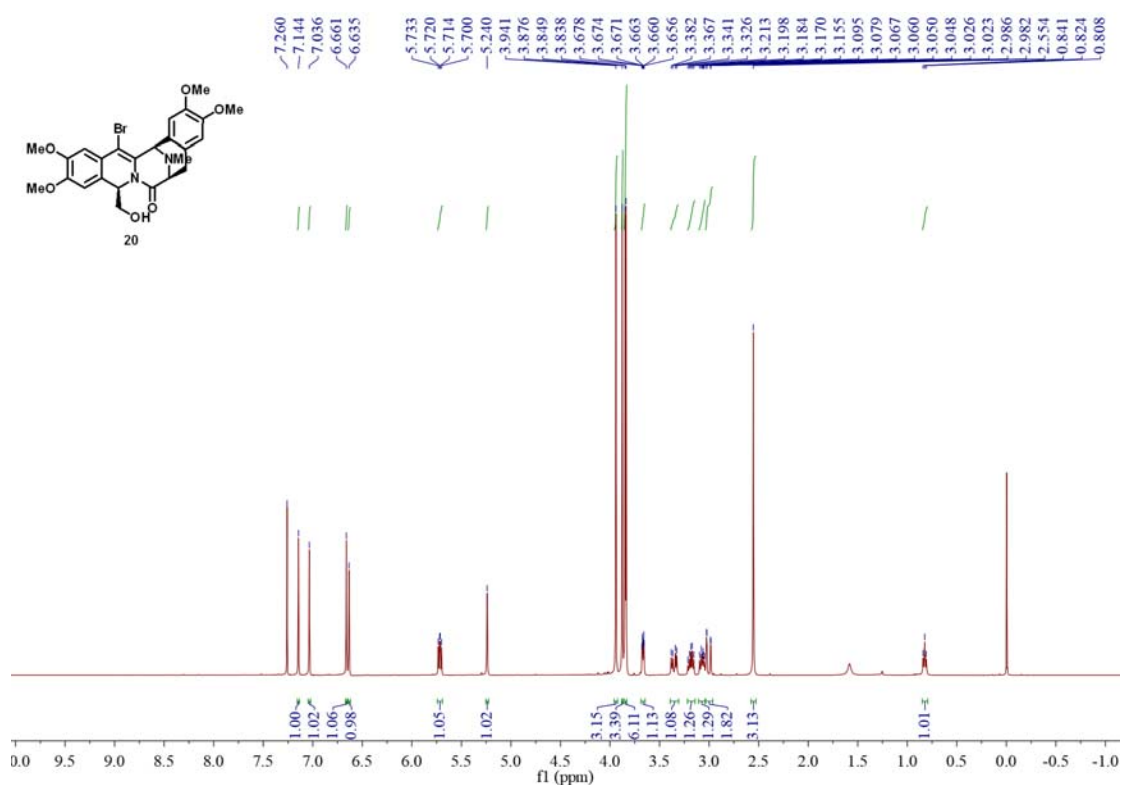

**<sup>13</sup>C NMR Spectrum of 20 (101 MHz, CDCl<sub>3</sub>)**

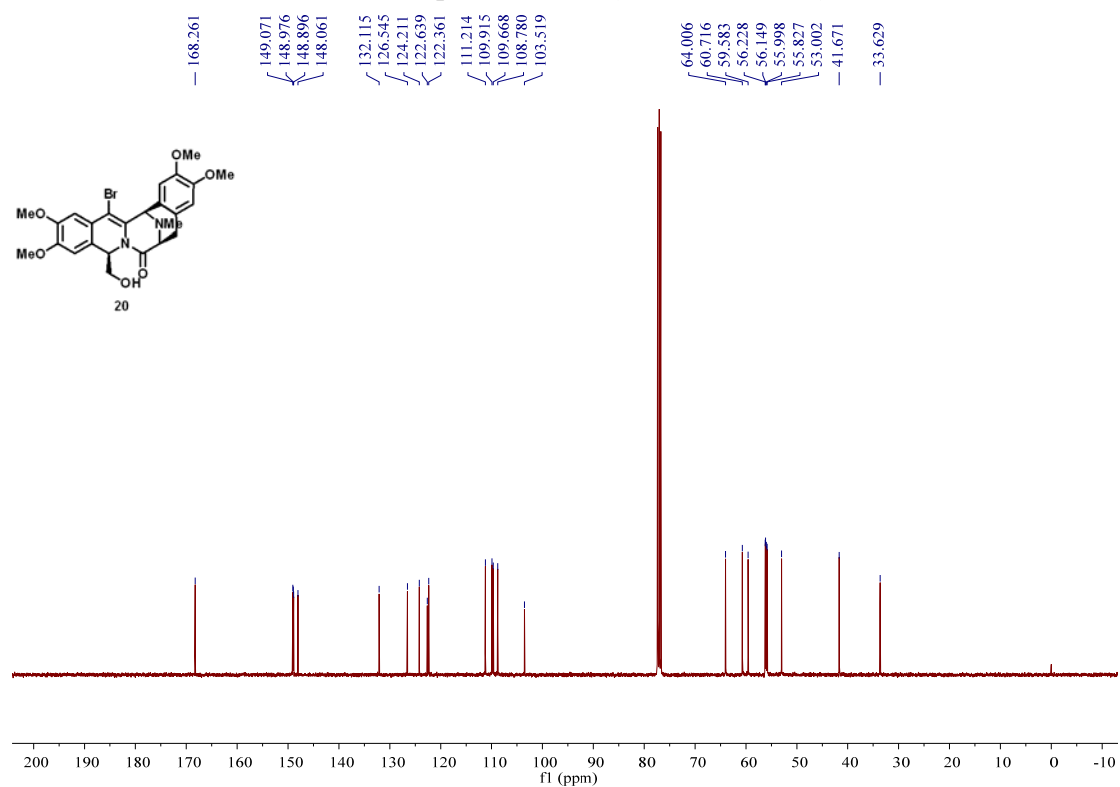

# <sup>1</sup>H NMR Spectrum of 21a (400 MHz, CDCl<sub>3</sub>)

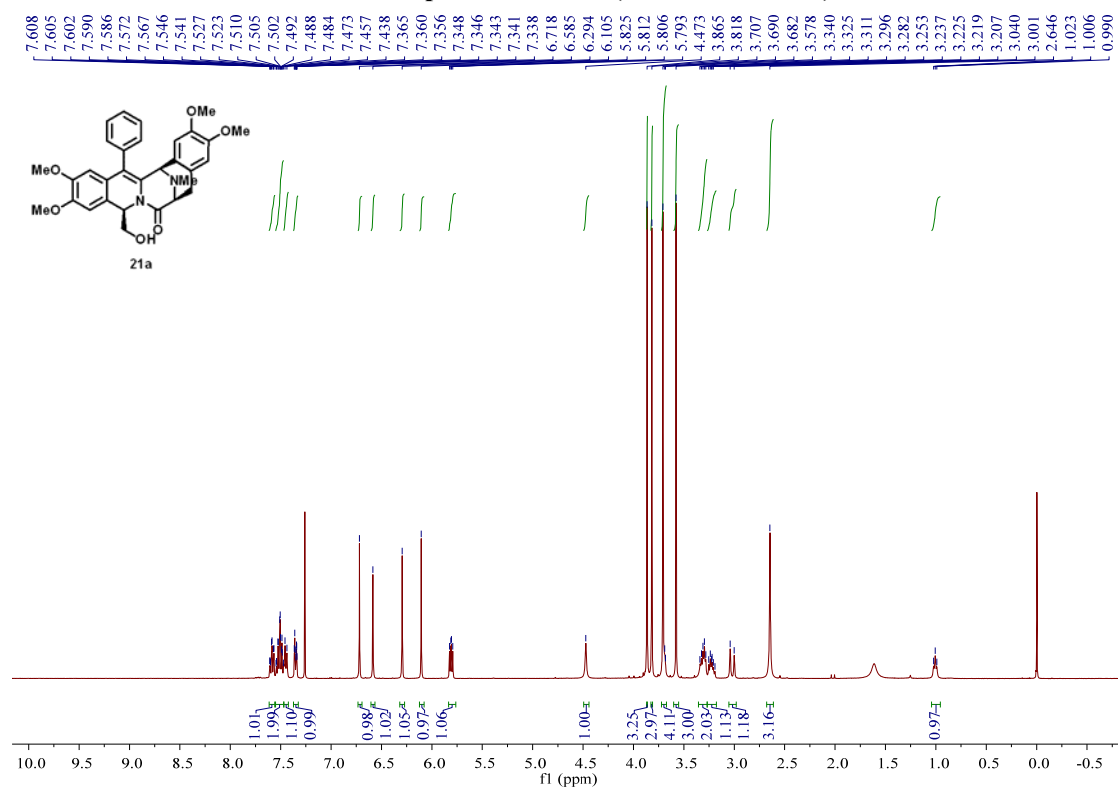

# <sup>13</sup>C NMR Spectrum of 21a (101 MHz, CDCl<sub>3</sub>)

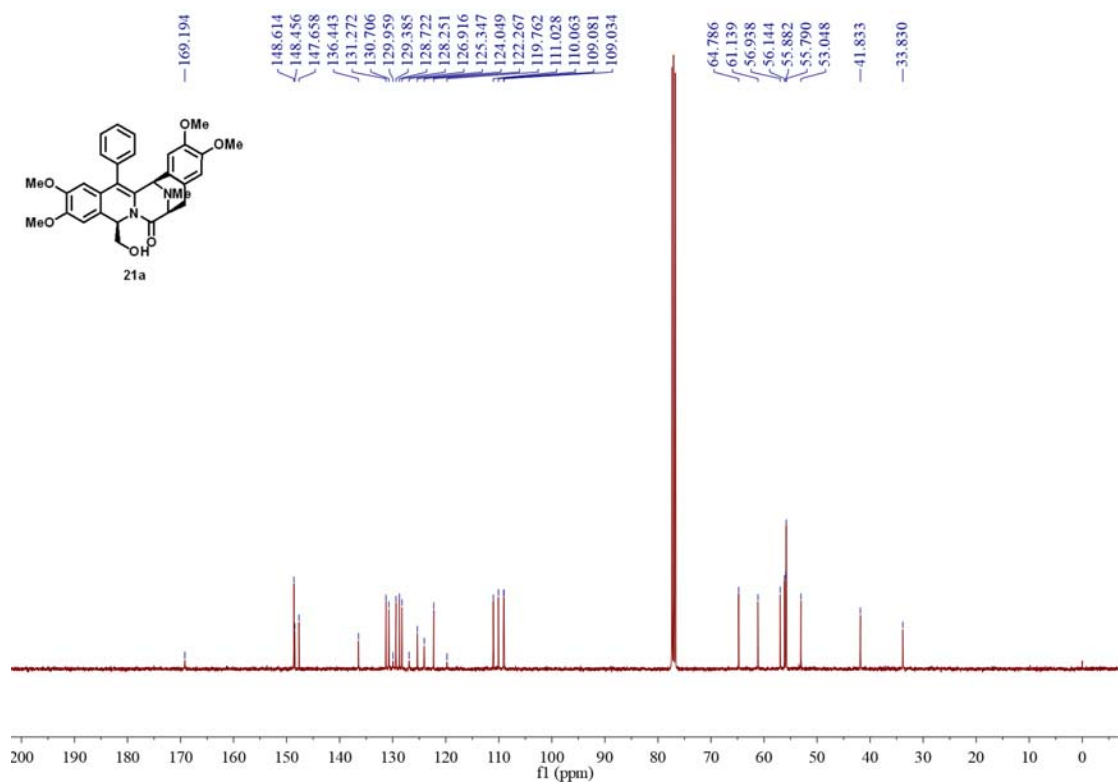

**<sup>1</sup>H NMR Spectrum of 21b (400 MHz, CDCl<sub>3</sub>)**

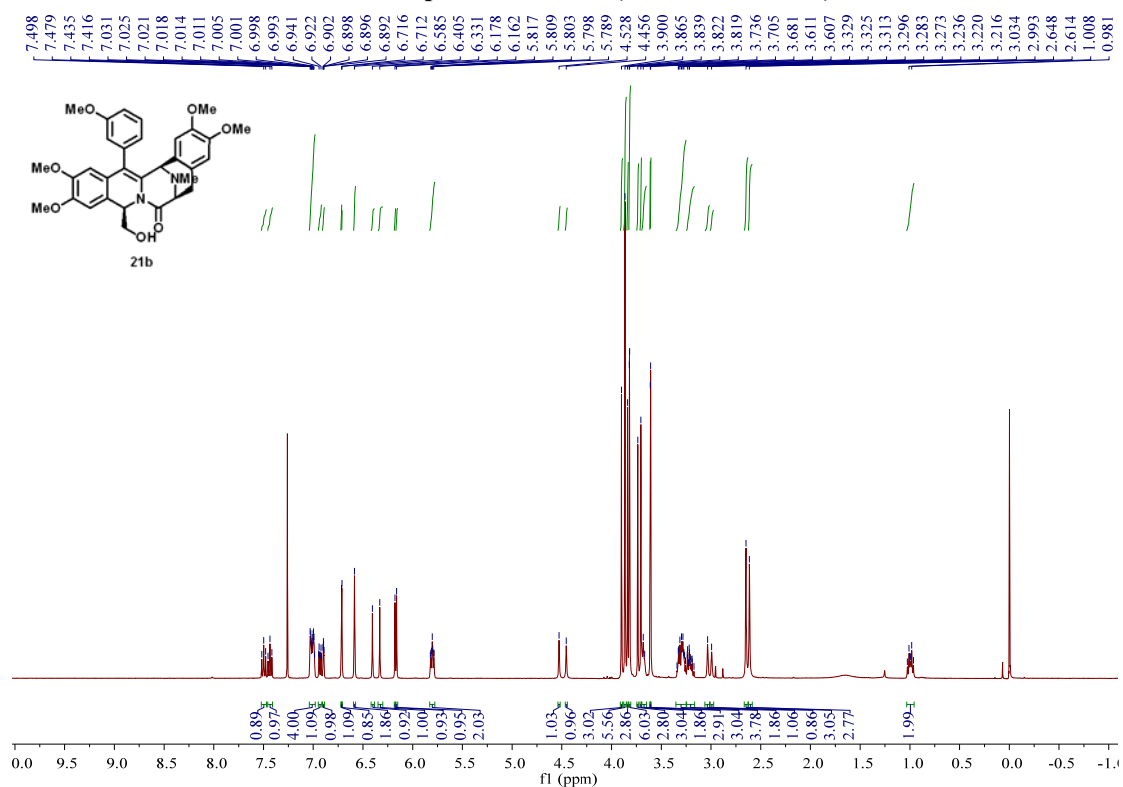

**<sup>13</sup>C NMR Spectrum of 21b (101 MHz, CDCl<sub>3</sub>)**

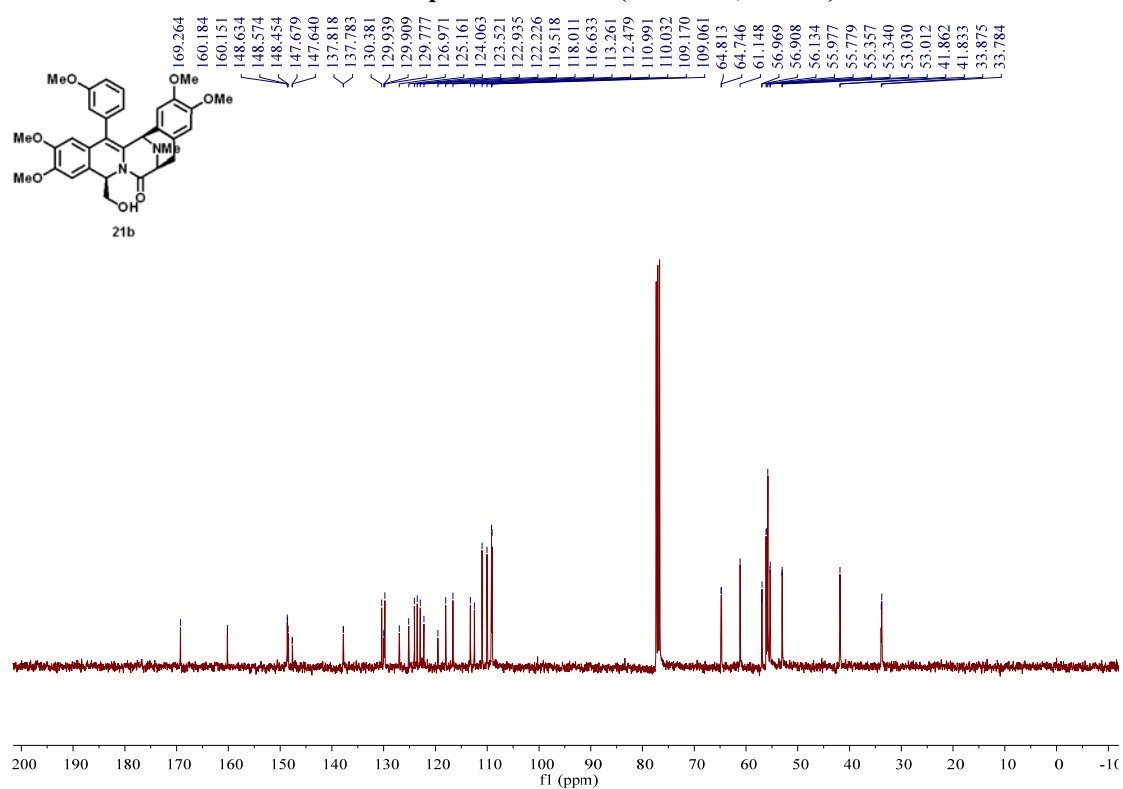

# <sup>1</sup>H NMR Spectrum of 21c (400 MHz, CDCl<sub>3</sub>)

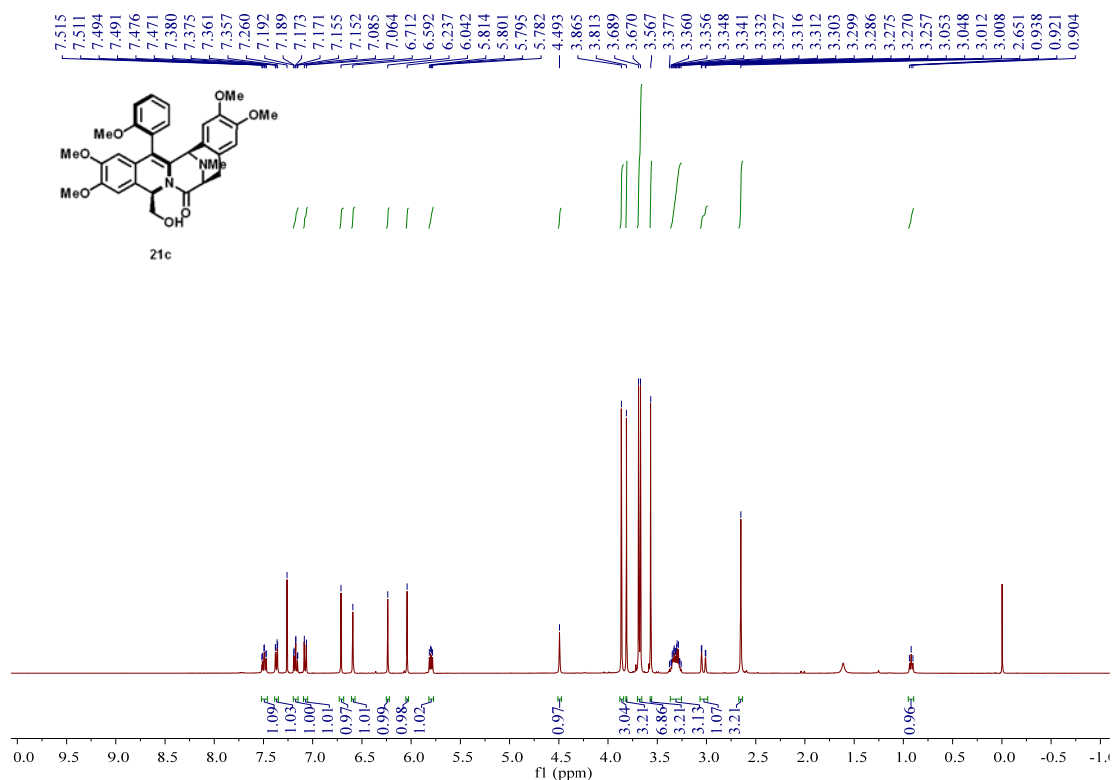

# <sup>13</sup>C NMR Spectrum of 21c (101 MHz, CDCl<sub>3</sub>)

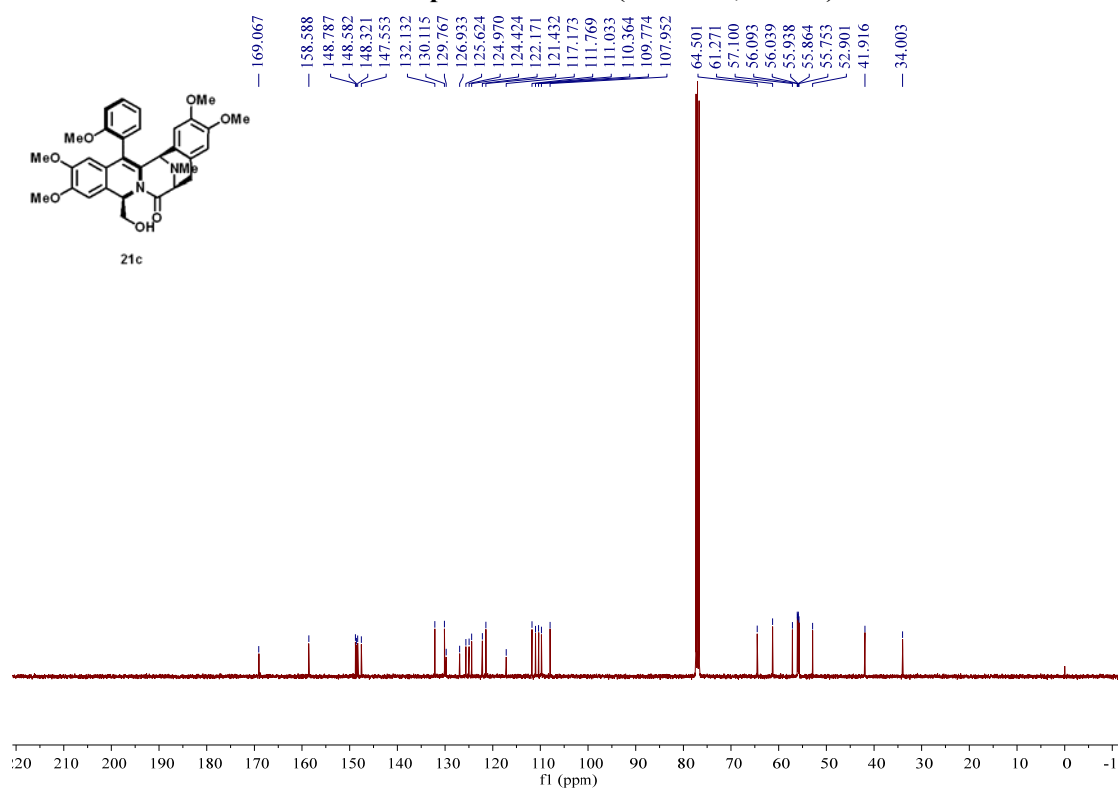

HSQC of 21c

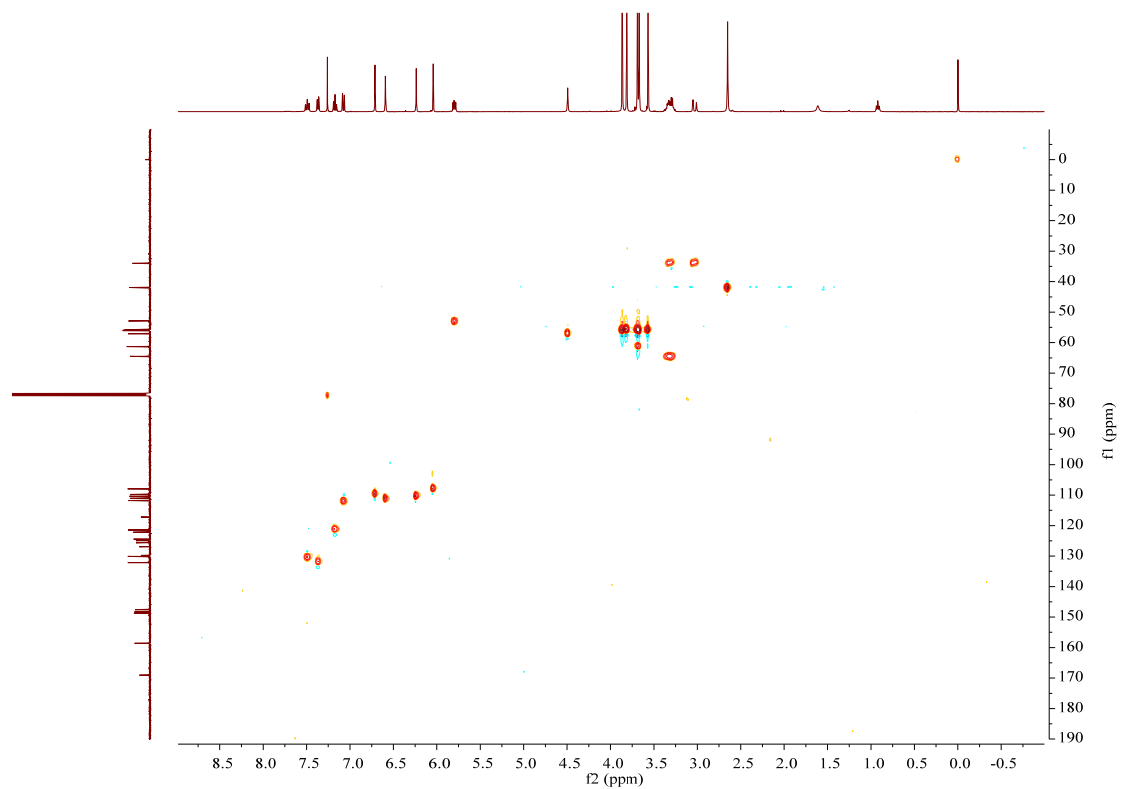

HMBC of 21c

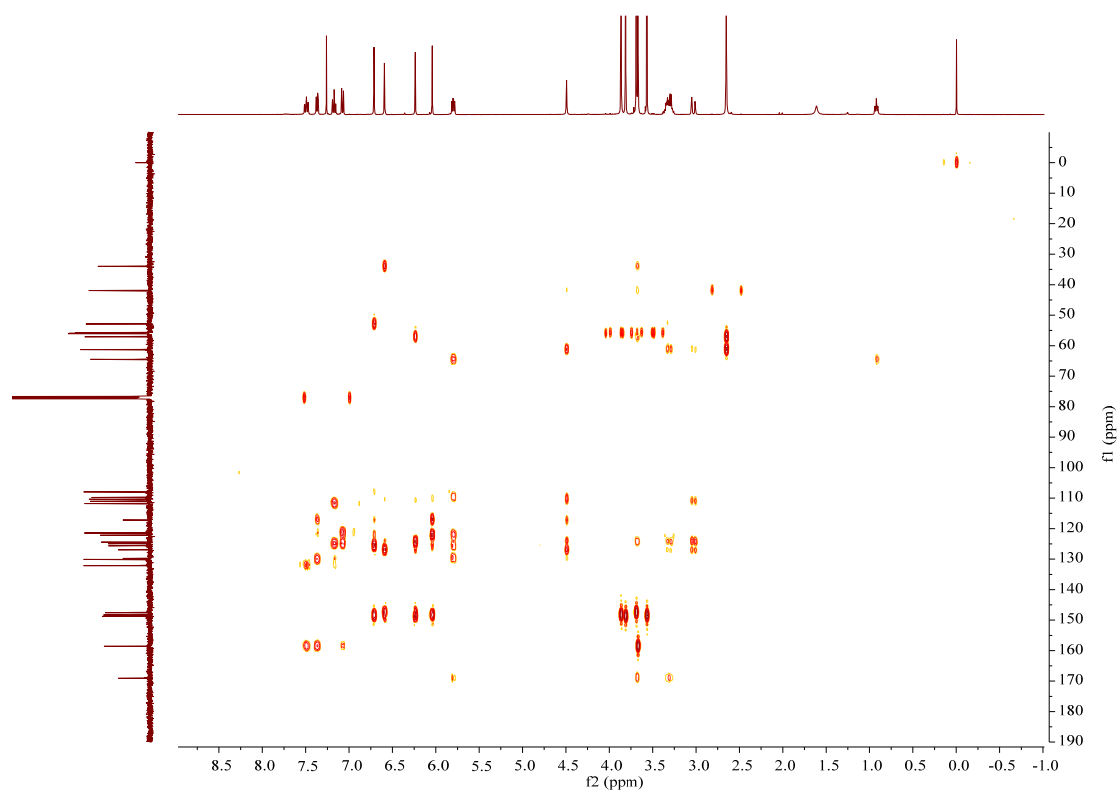

# COSY of 21c

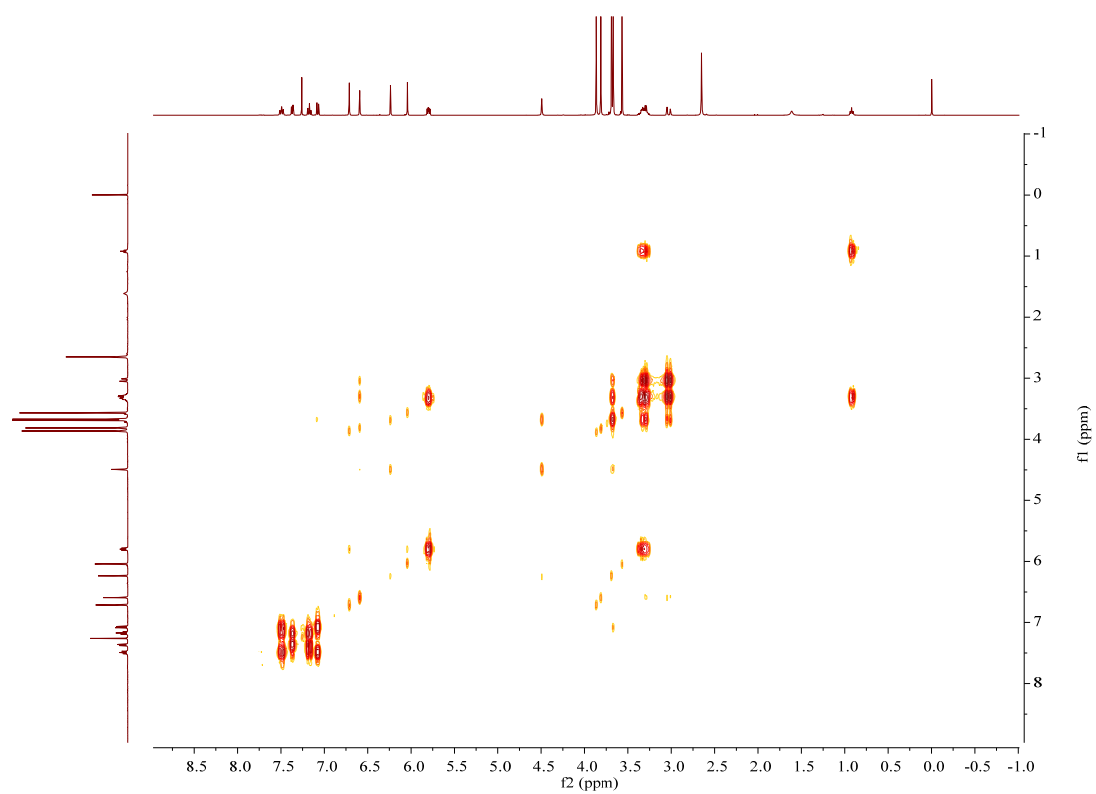

# NOE of 21c

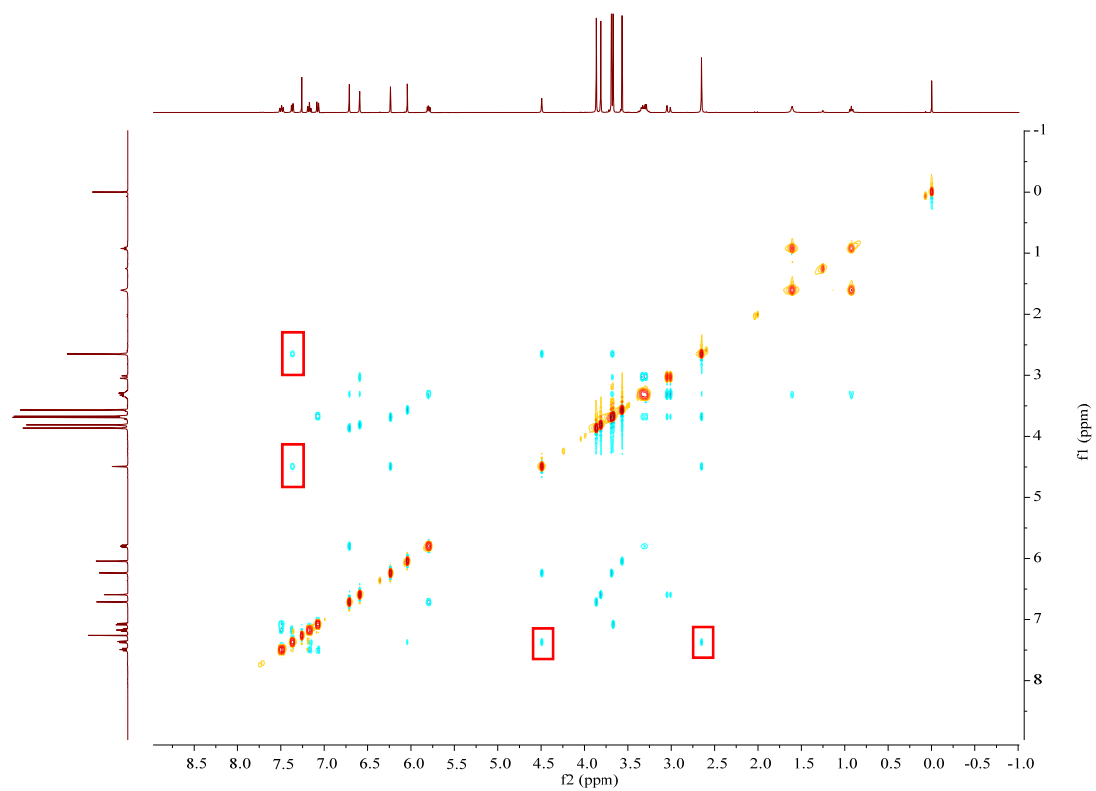

# <sup>1</sup>H NMR Spectrum of 21d (400 MHz, CDCl<sub>3</sub>)

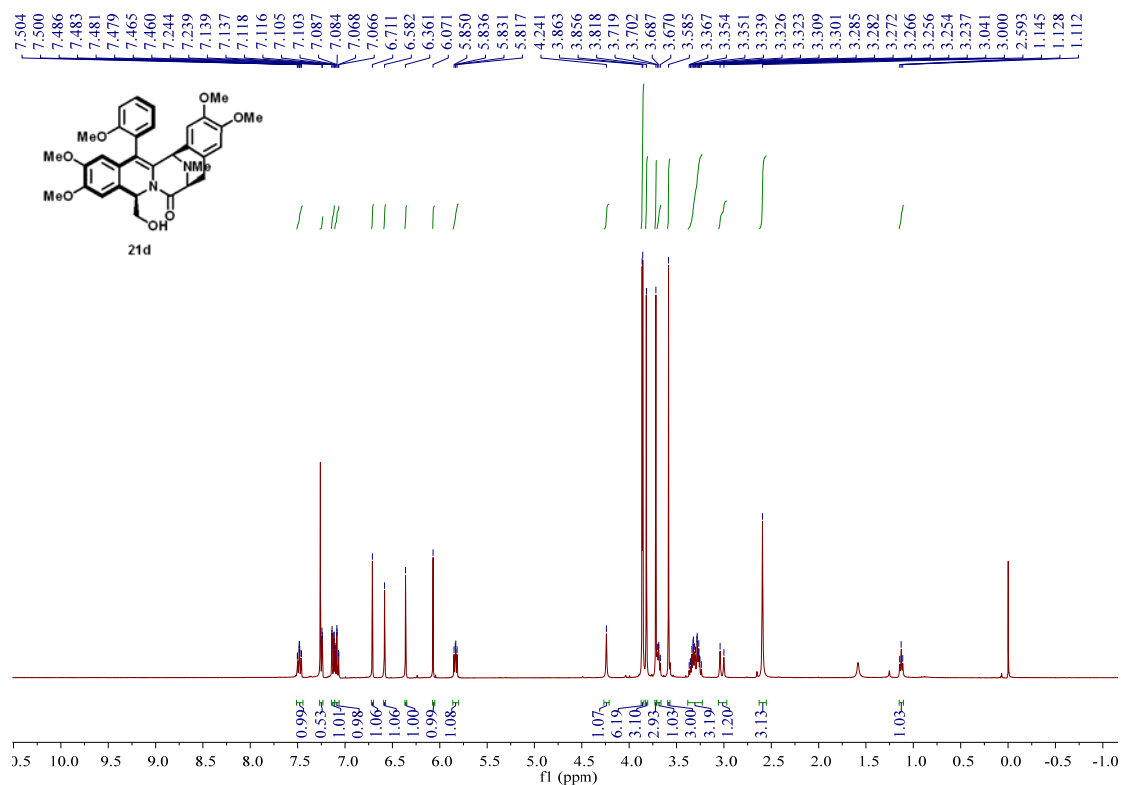

## <sup>13</sup>C NMR Spectrum of 21d (101 MHz, CDCl<sub>3</sub>)

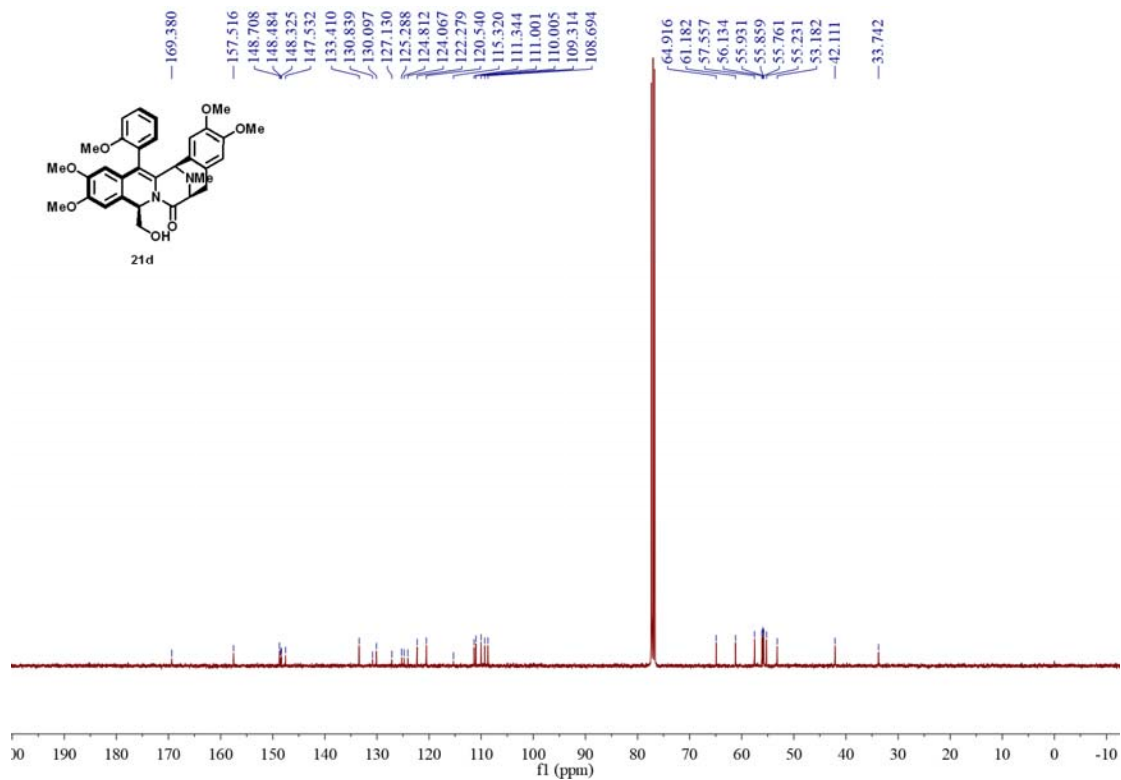

HSQC of 21d

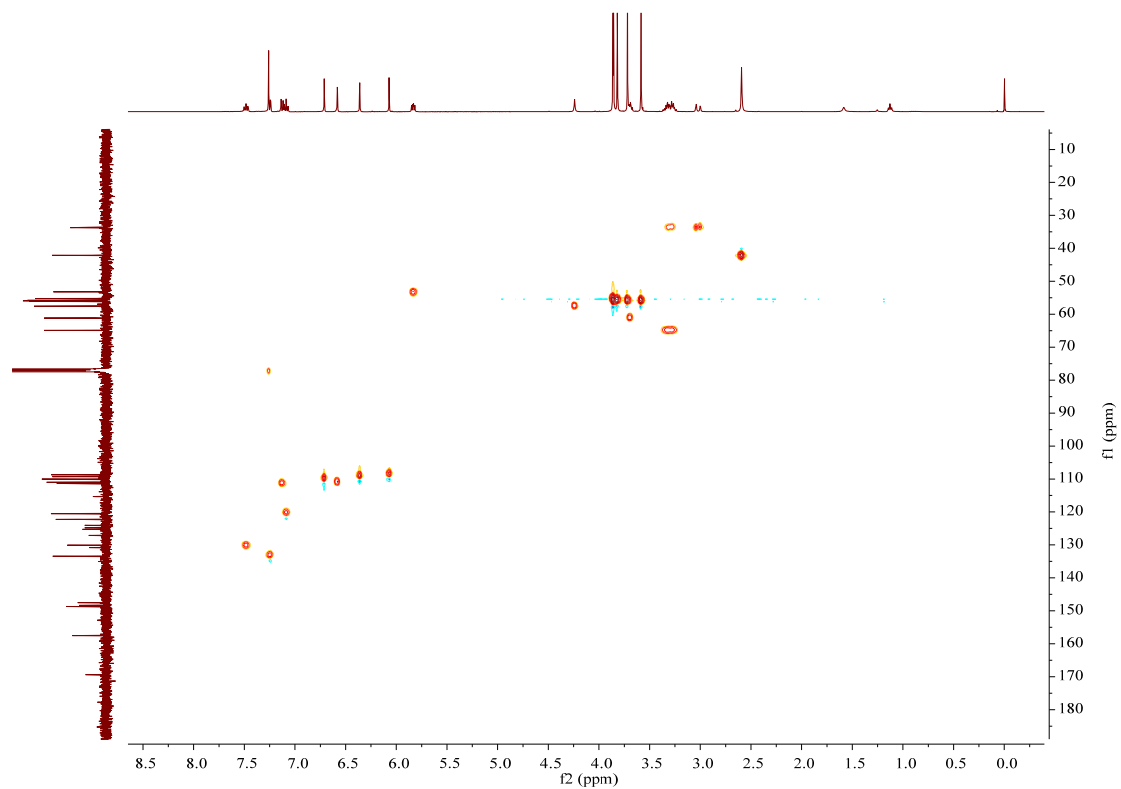

HMBC of 21d

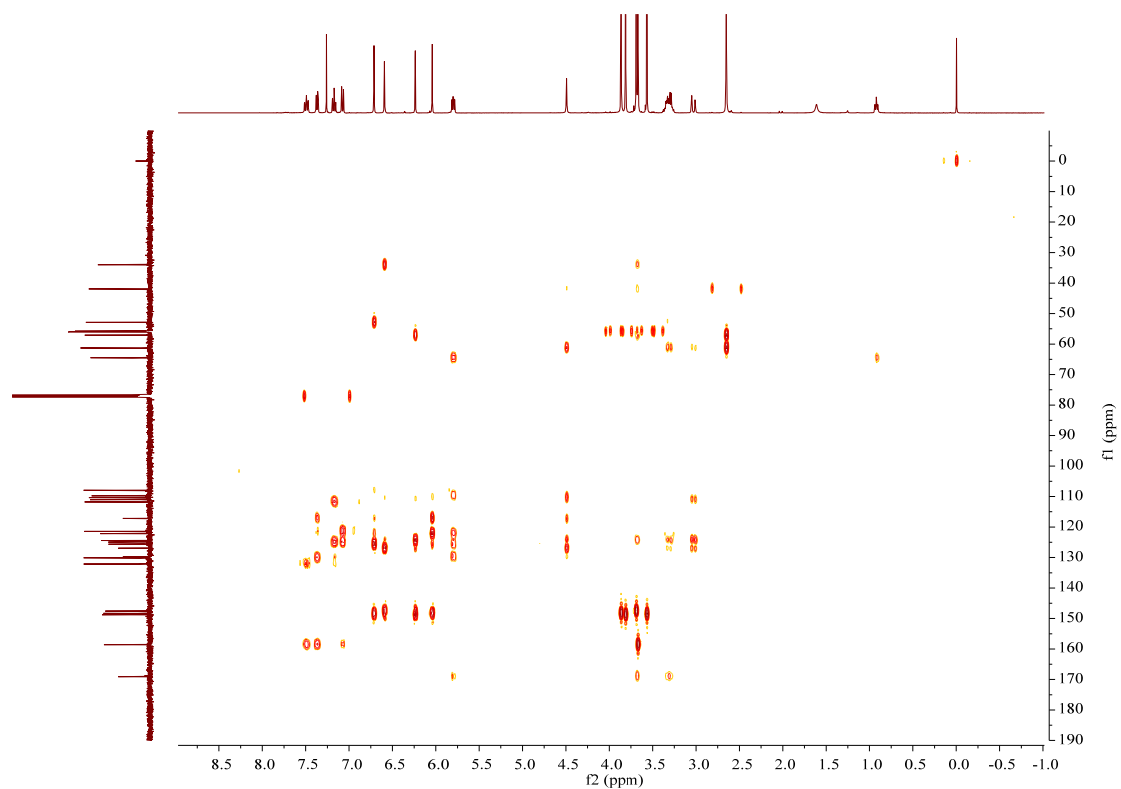



### COSY of 21d

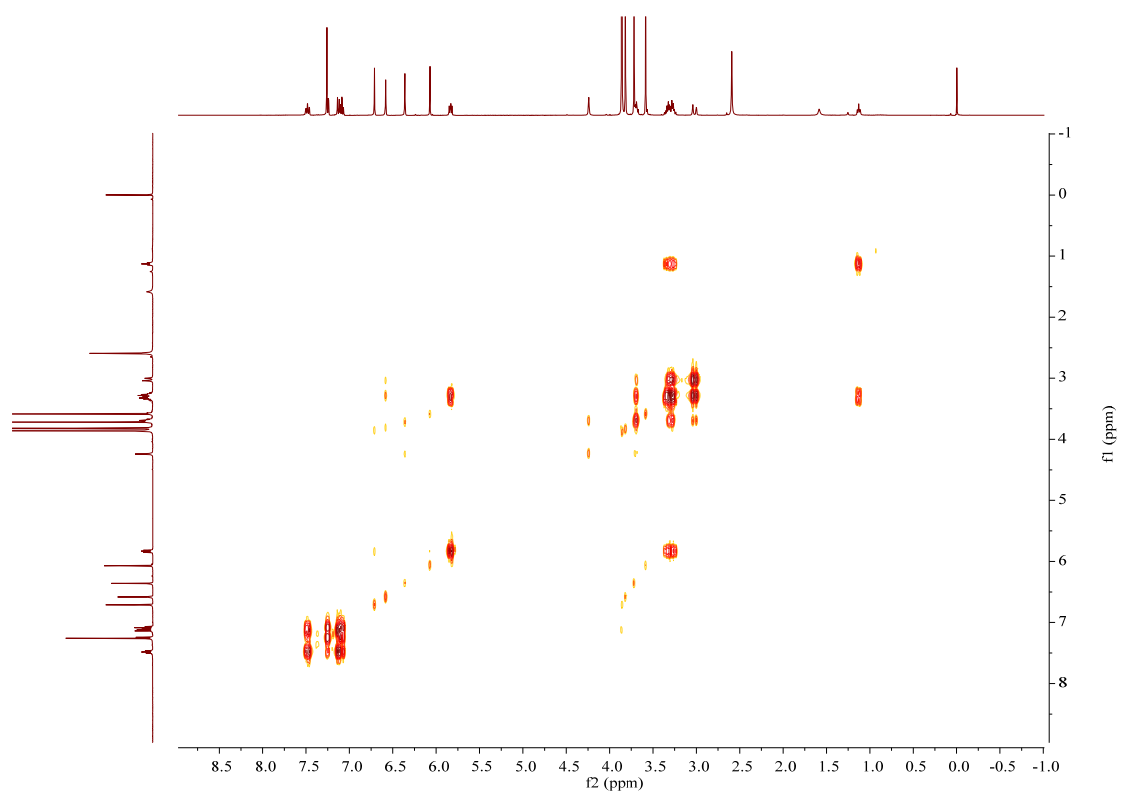

### NOE of 21d

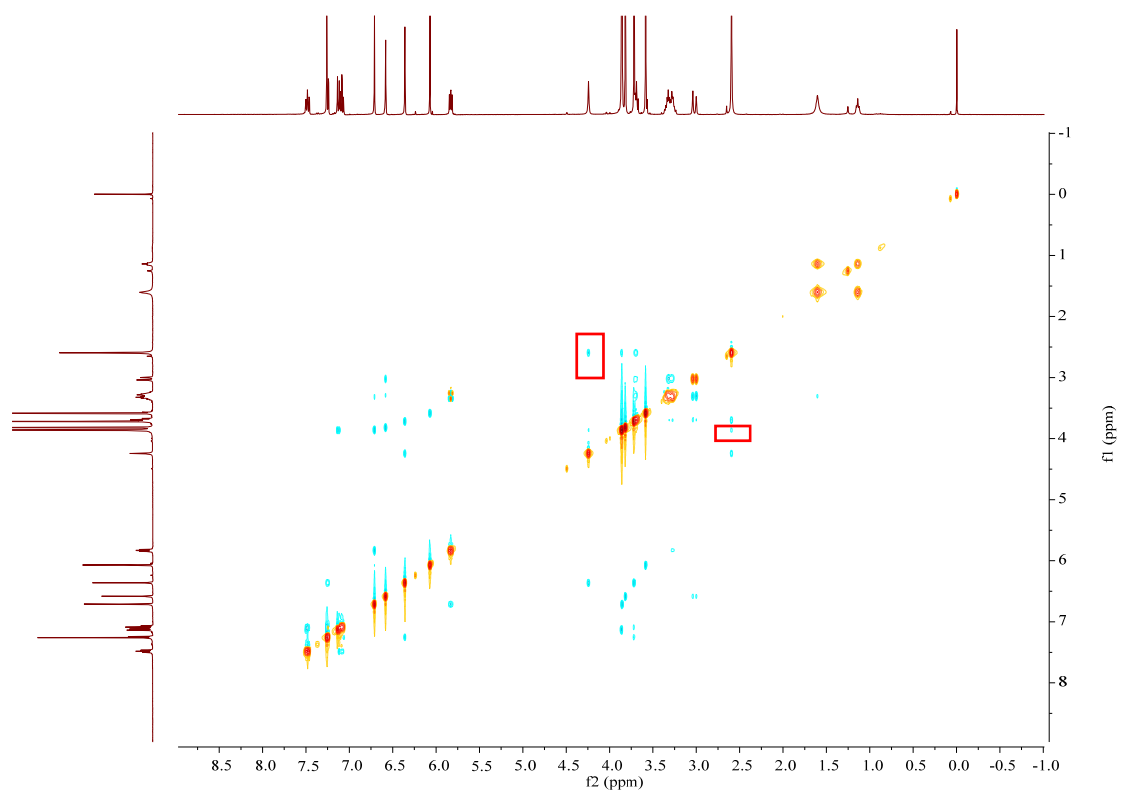

# <sup>1</sup>H NMR Spectrum of 21e (400 MHz, CDCl<sub>3</sub>)

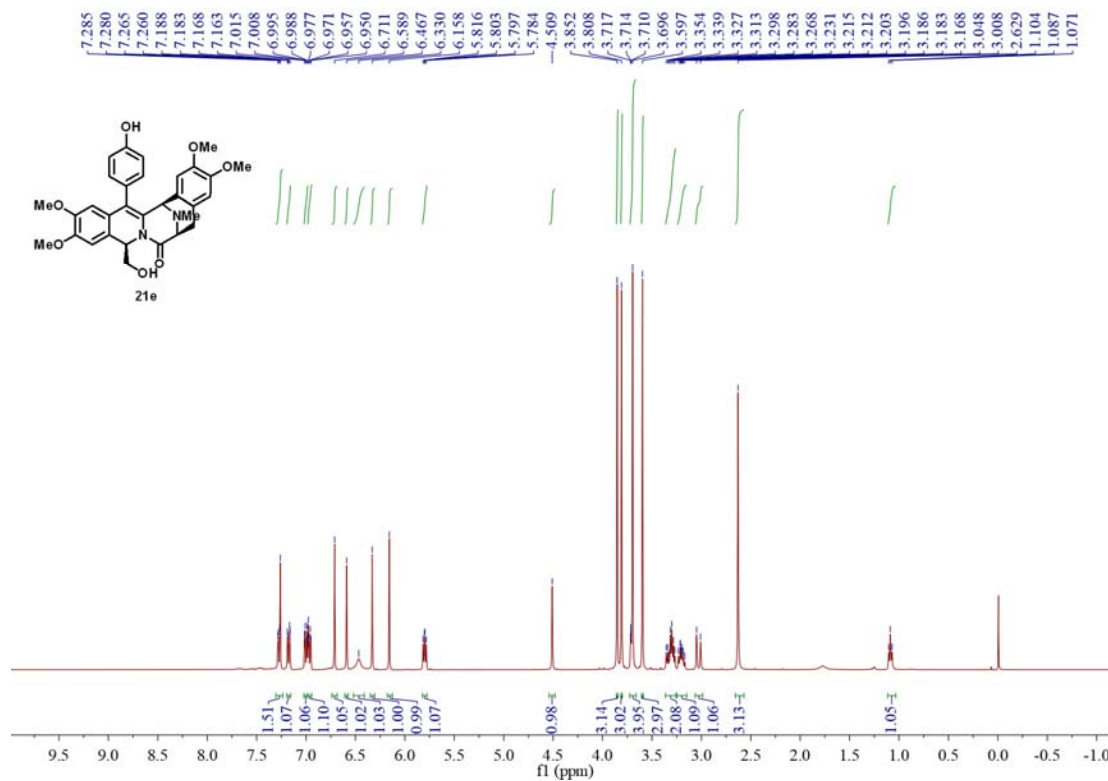

# <sup>13</sup>C NMR Spectrum of 21e (101 MHz, CDCl<sub>3</sub>)

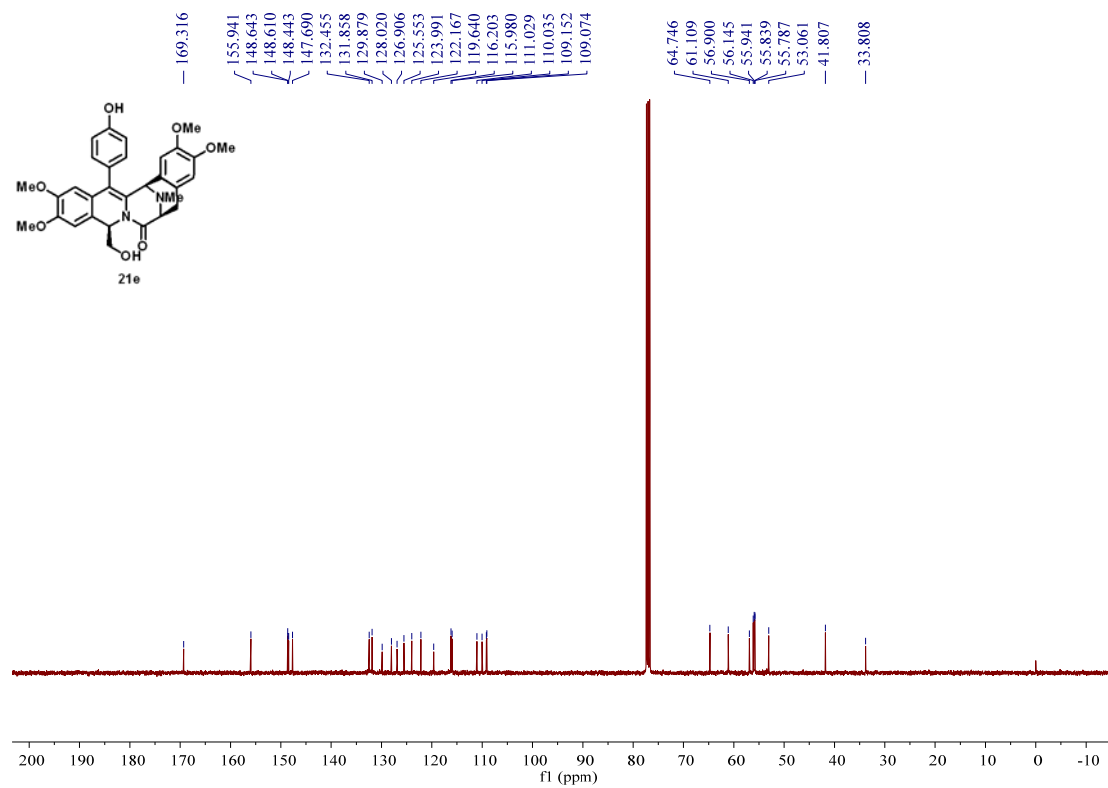

**<sup>1</sup>H NMR Spectrum of 21f (400 MHz, CDCl<sub>3</sub>)**

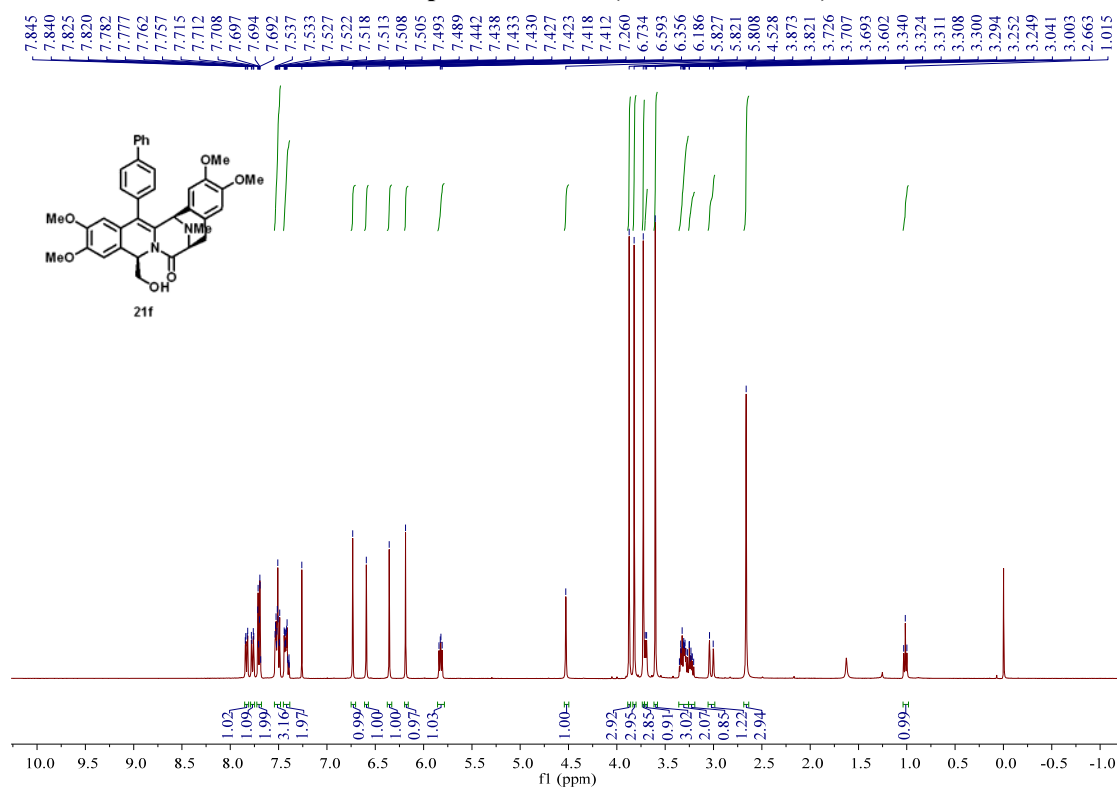

**<sup>13</sup>C NMR Spectrum of 21f (101 MHz, CDCl<sub>3</sub>)**

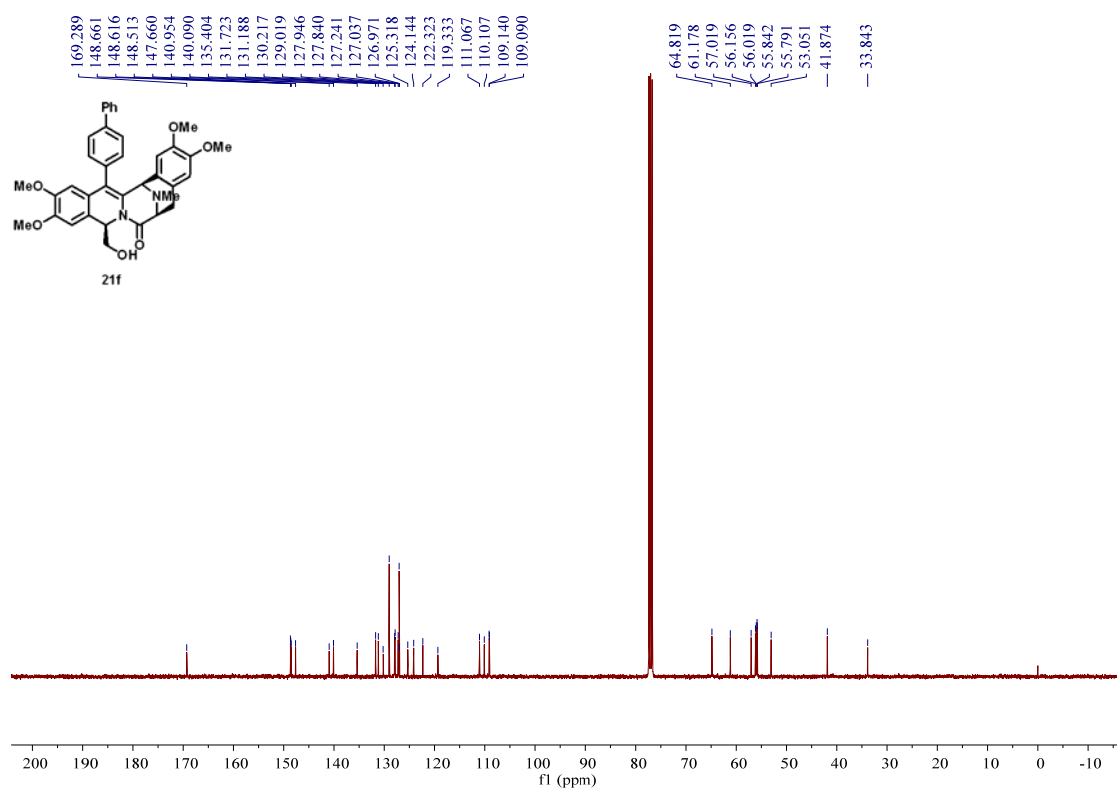

**<sup>1</sup>H NMR Spectrum of 21g (400 MHz, CDCl<sub>3</sub>)**

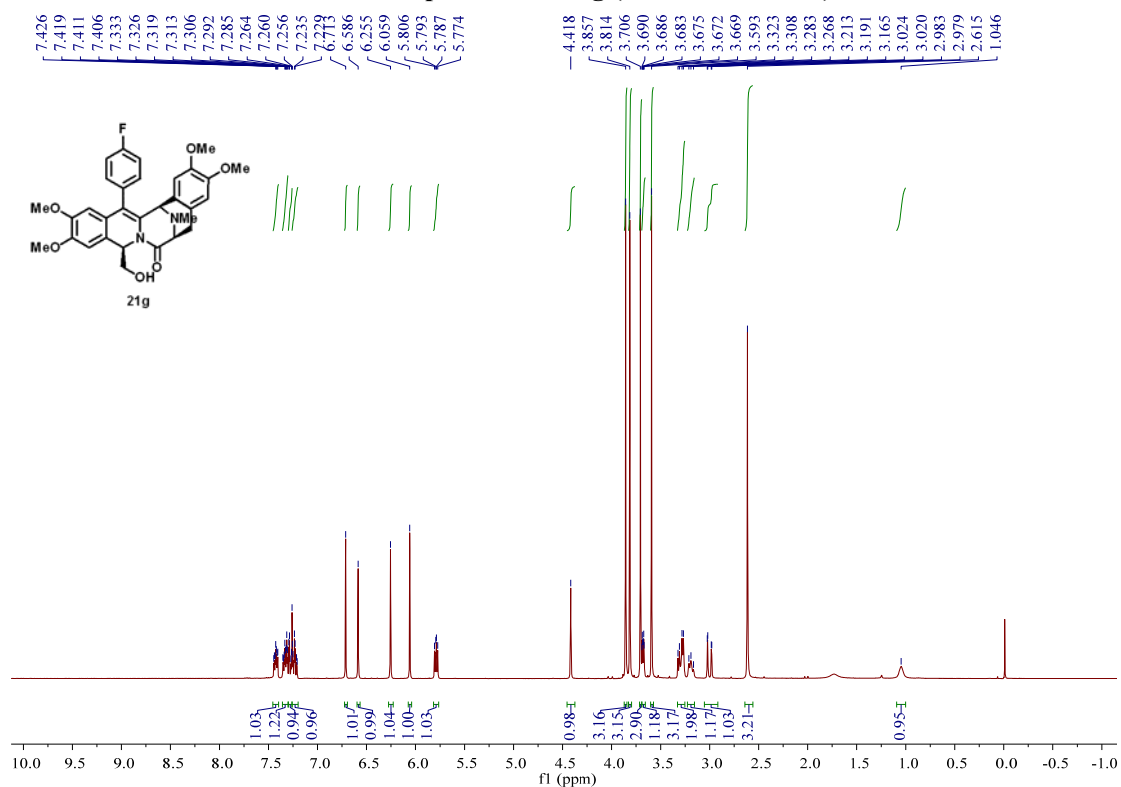

**<sup>13</sup>C NMR Spectrum of 21g (101 MHz, CDCl<sub>3</sub>)**

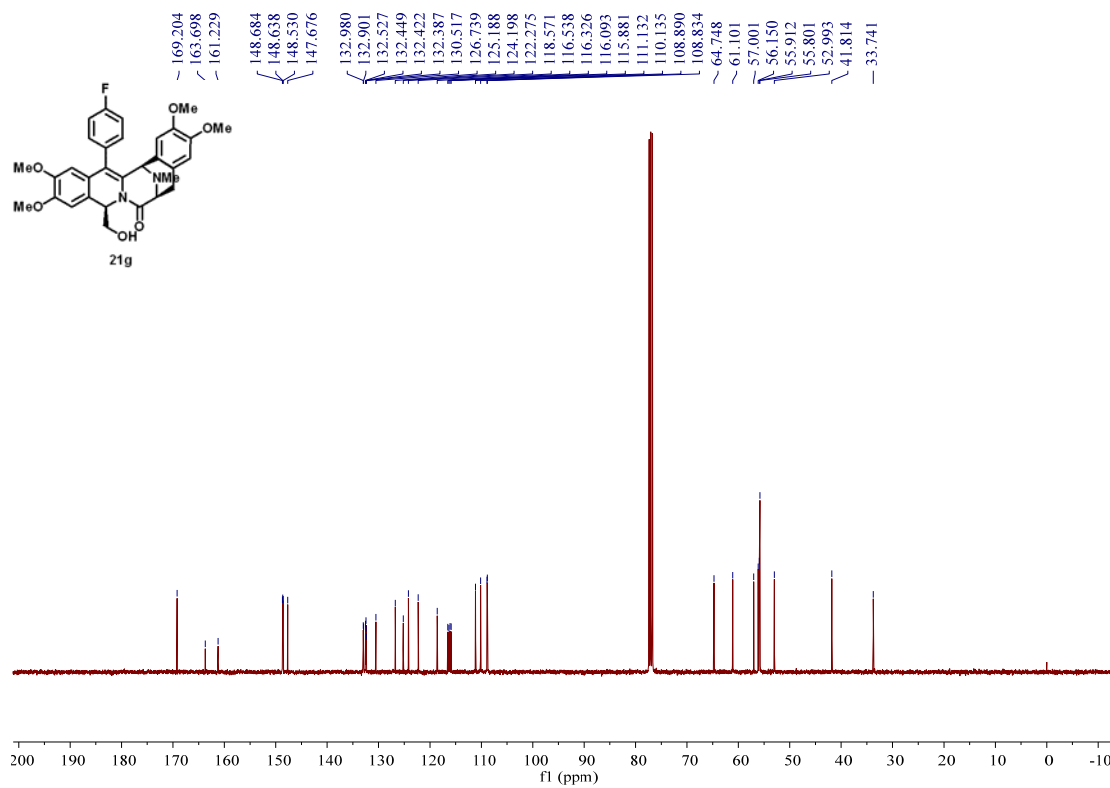

**$^{19}\text{F}$  NMR Spectrum of 21g (400 MHz,  $\text{CDCl}_3$ )**

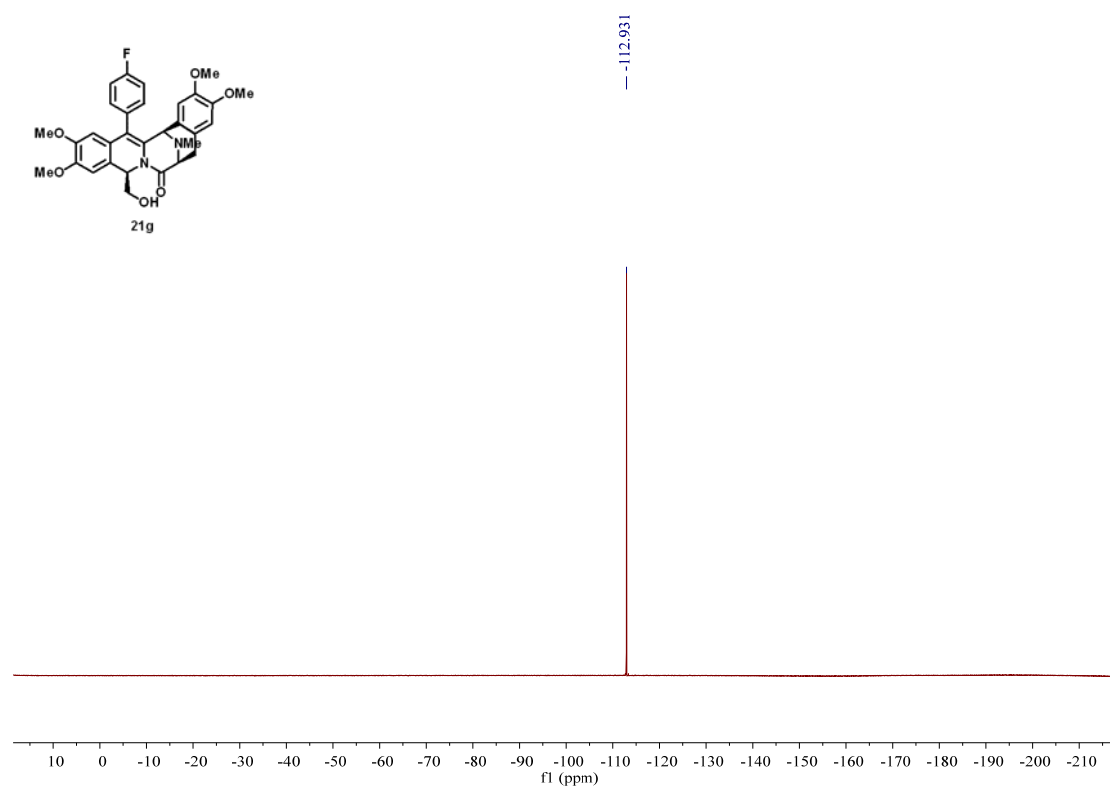

# **<sup>1</sup>H NMR Spectrum of 21h (400 MHz, CDCl<sub>3</sub>)**

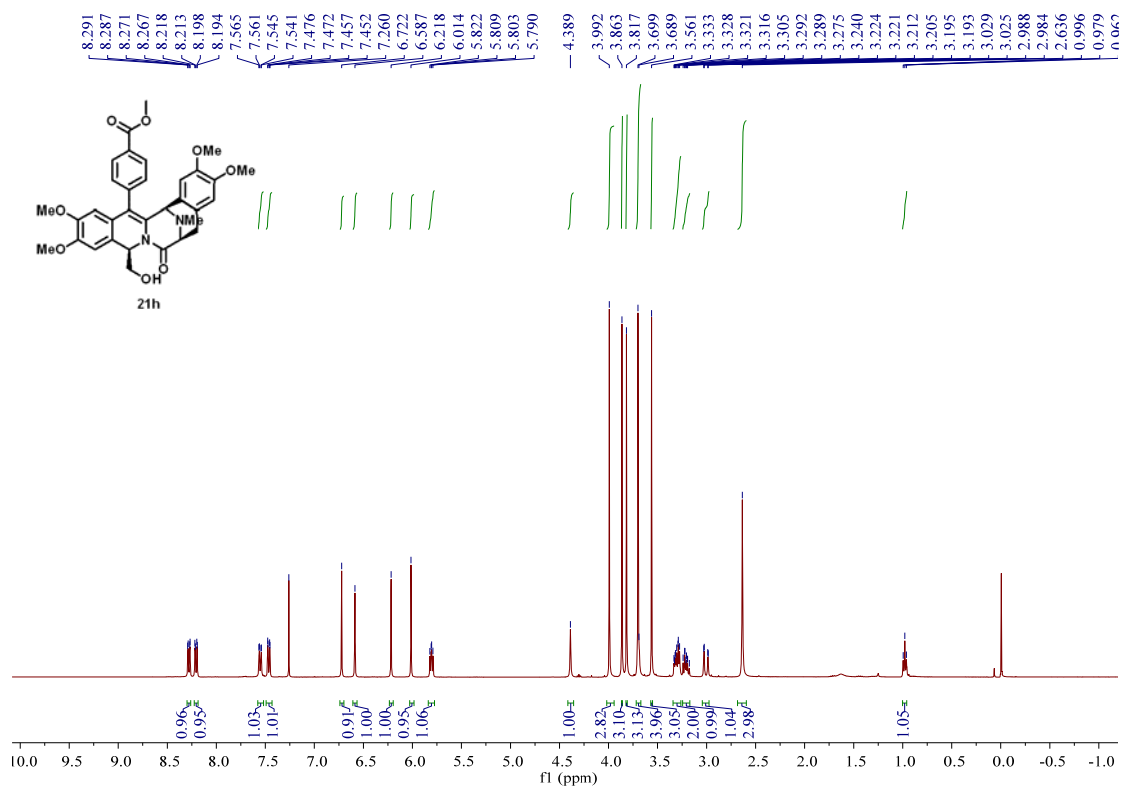

# **<sup>13</sup>C NMR Spectrum of 21h (101 MHz, CDCl<sub>3</sub>)**

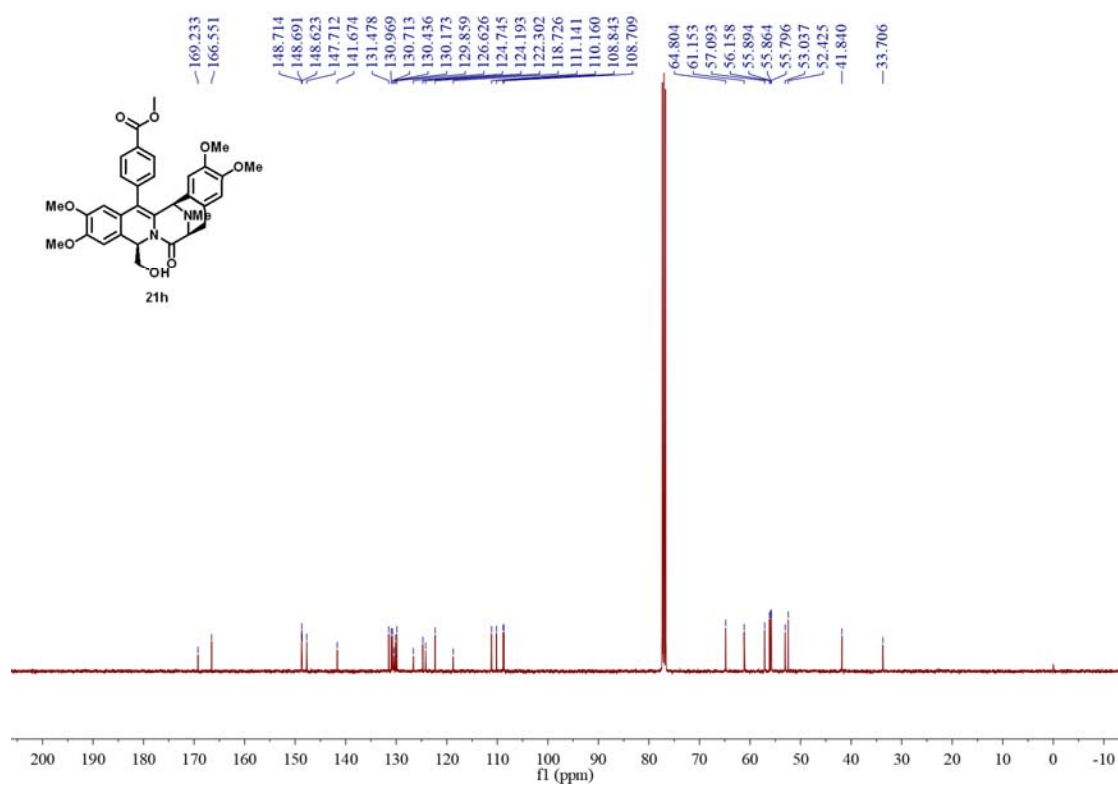

# <sup>1</sup>H NMR Spectrum of 21i (400 MHz, CDCl<sub>3</sub>)

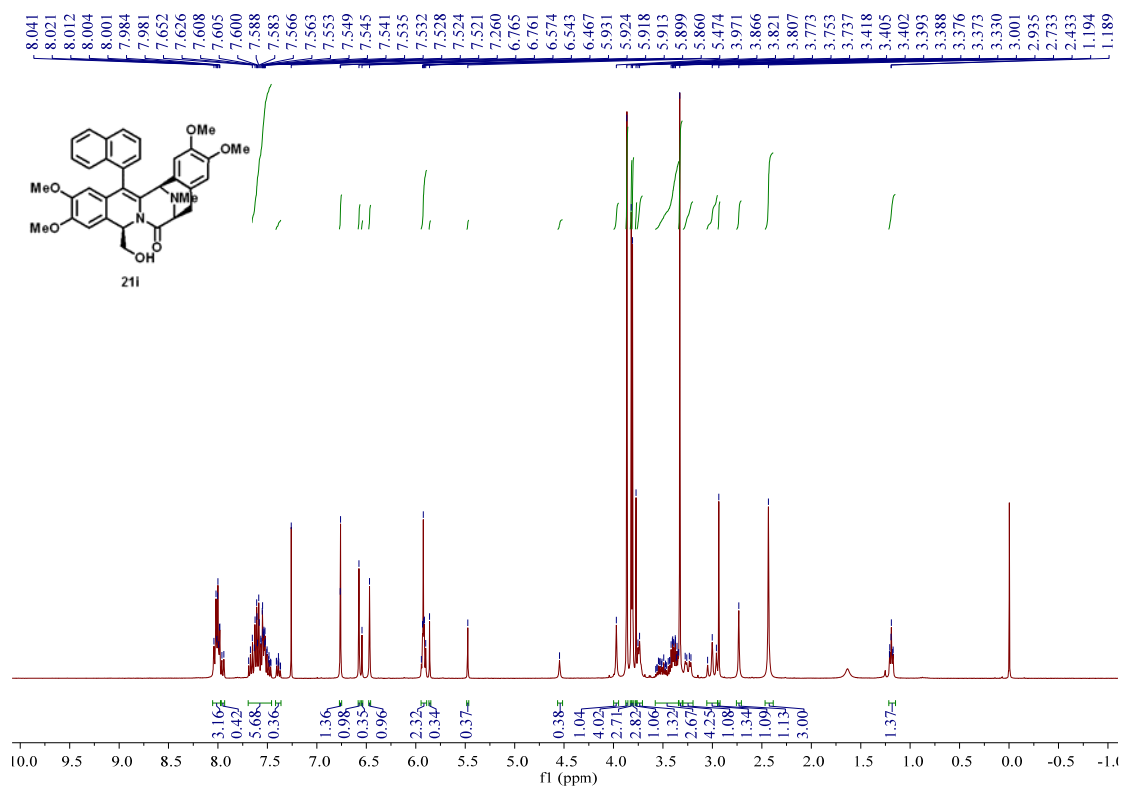

# <sup>13</sup>C NMR Spectrum of 21i (101 MHz, CDCl<sub>3</sub>)

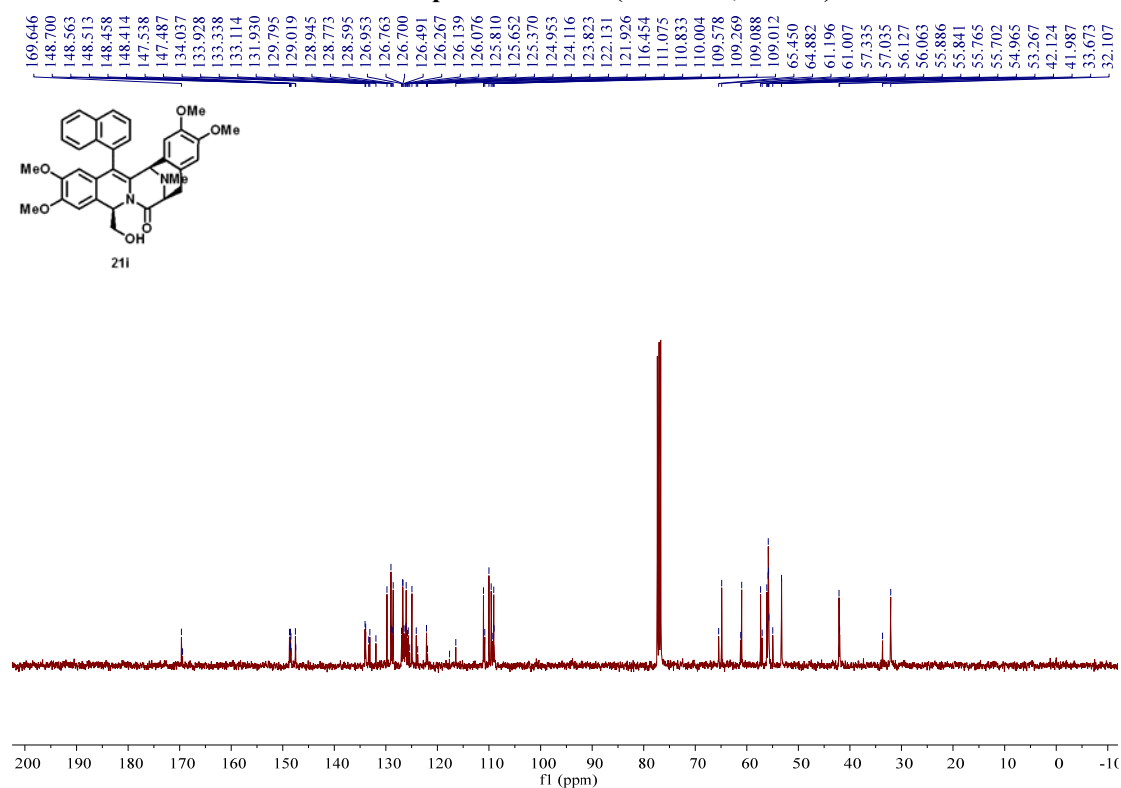

# <sup>1</sup>H NMR Spectrum of 21j (400 MHz, CDCl<sub>3</sub>)

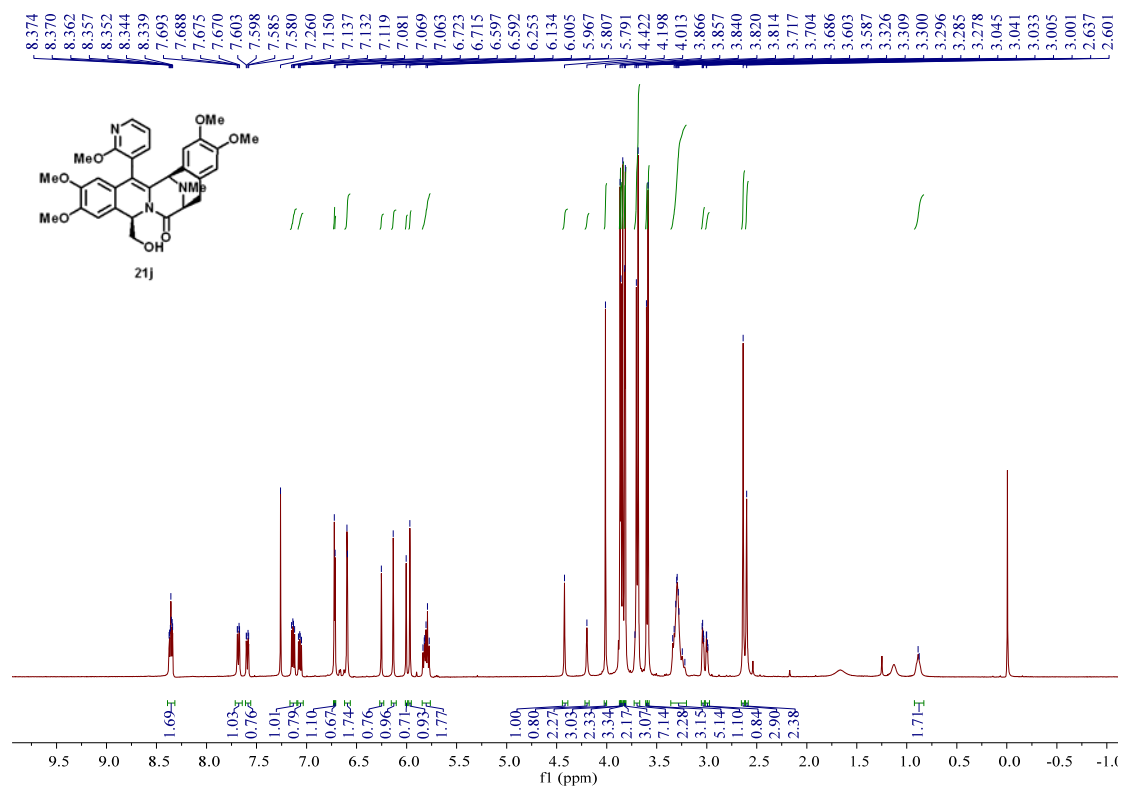

# <sup>13</sup>C NMR Spectrum of 21j (101 MHz, CDCl<sub>3</sub>)

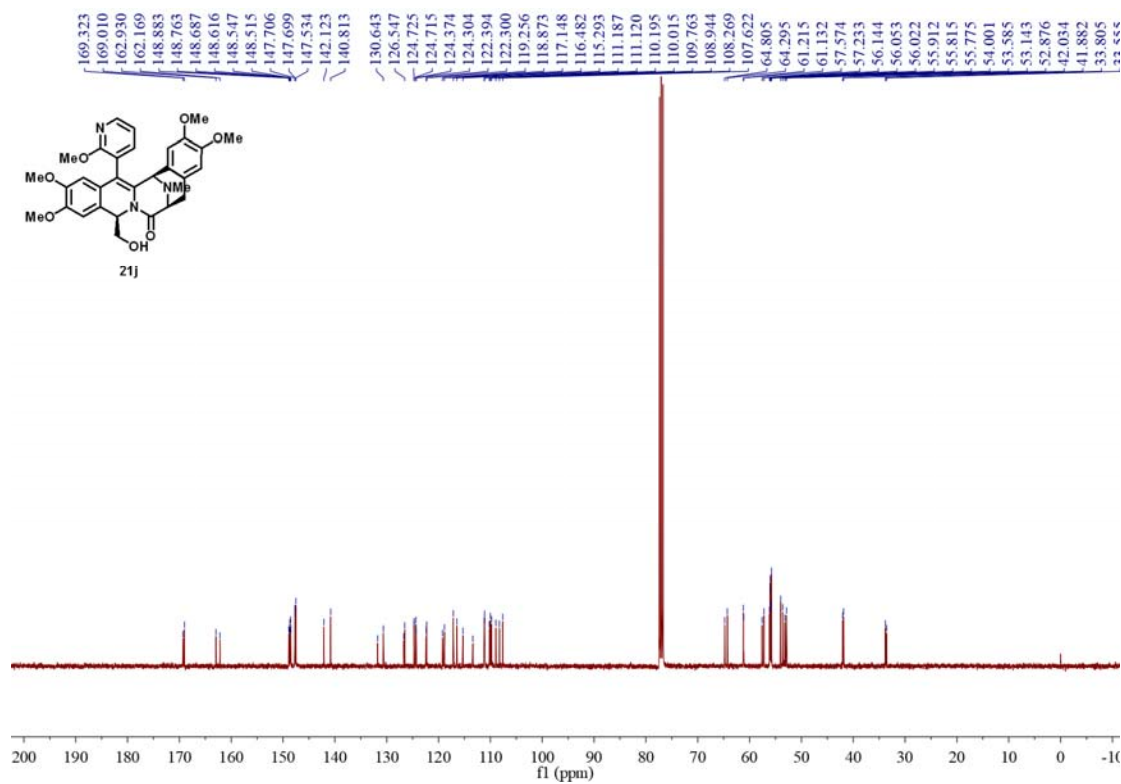



# <sup>1</sup>H NMR Spectrum of 21k (400 MHz, CDCl<sub>3</sub>)

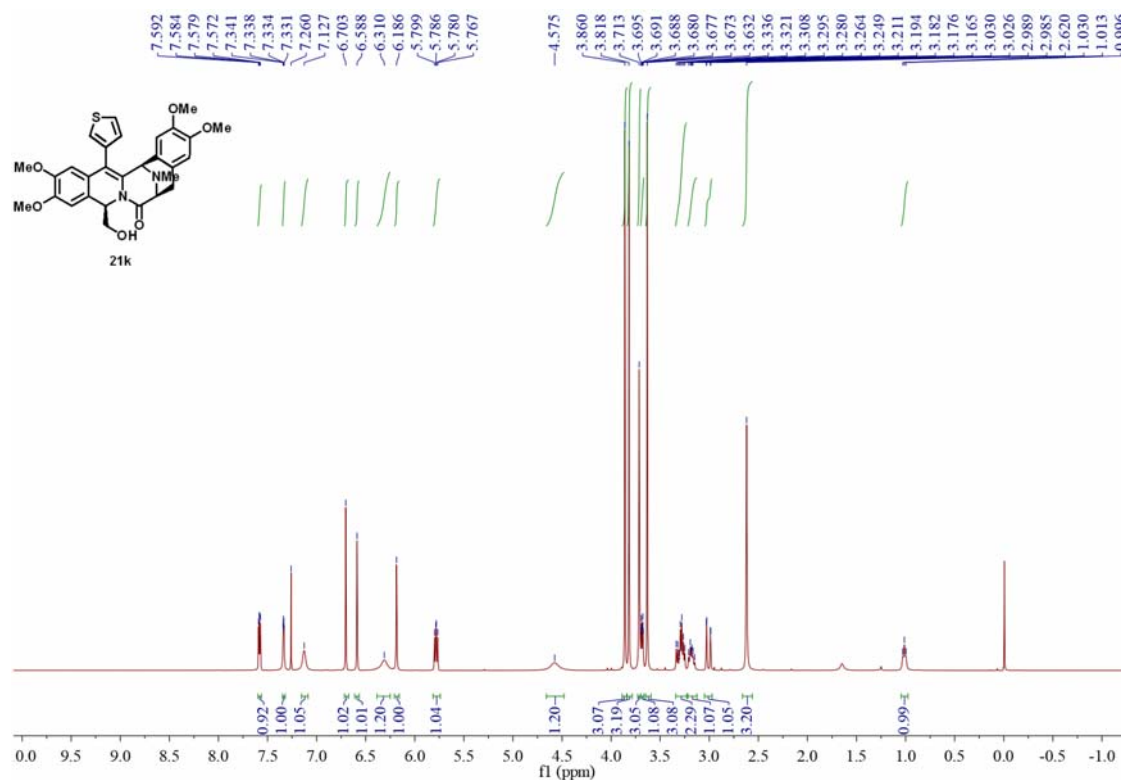

# <sup>13</sup>C NMR Spectrum of 21k (101 MHz, CDCl<sub>3</sub>)

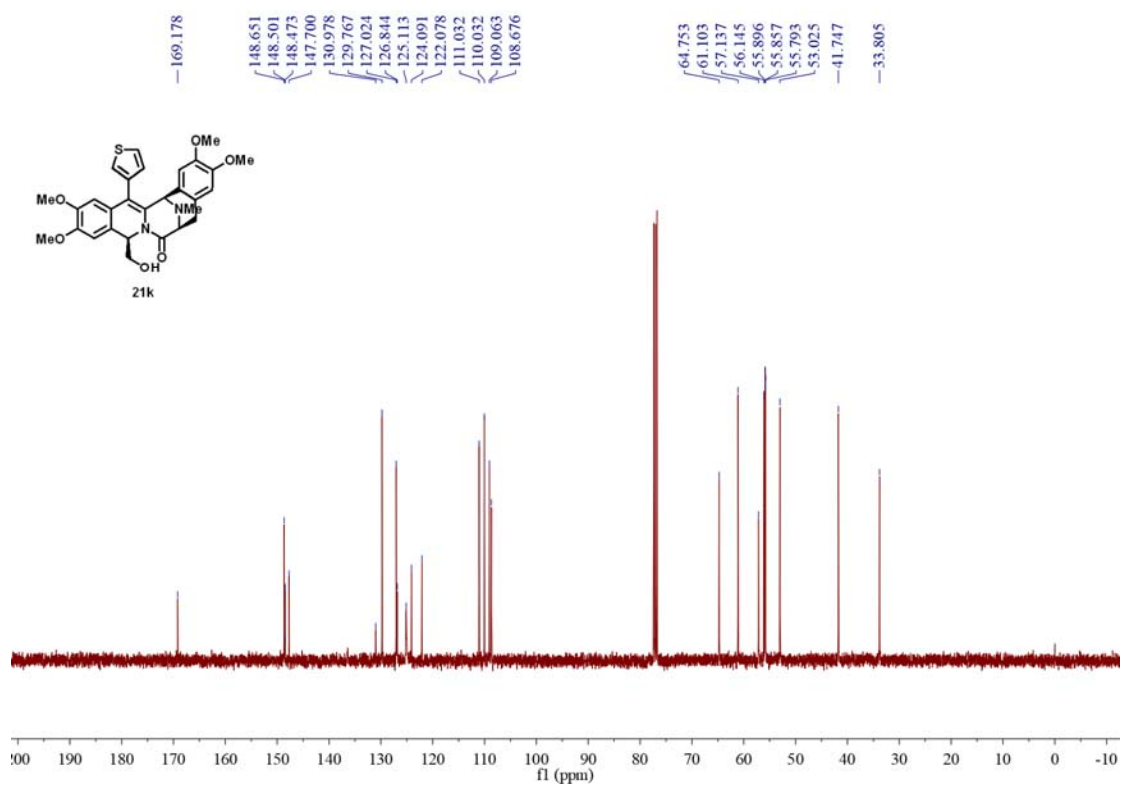

# <sup>1</sup>H NMR Spectrum of 21I (400 MHz, CDCl<sub>3</sub>)

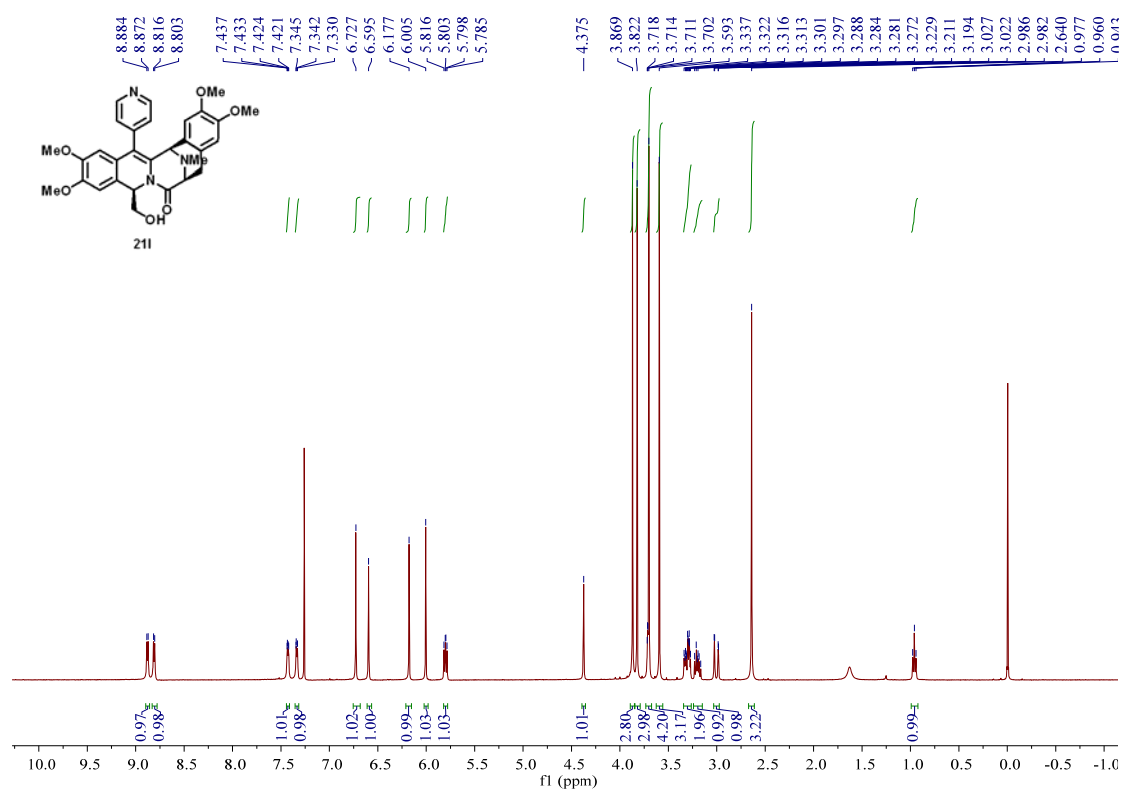

# <sup>13</sup>C NMR Spectrum of 21I (101 MHz, CDCl<sub>3</sub>)

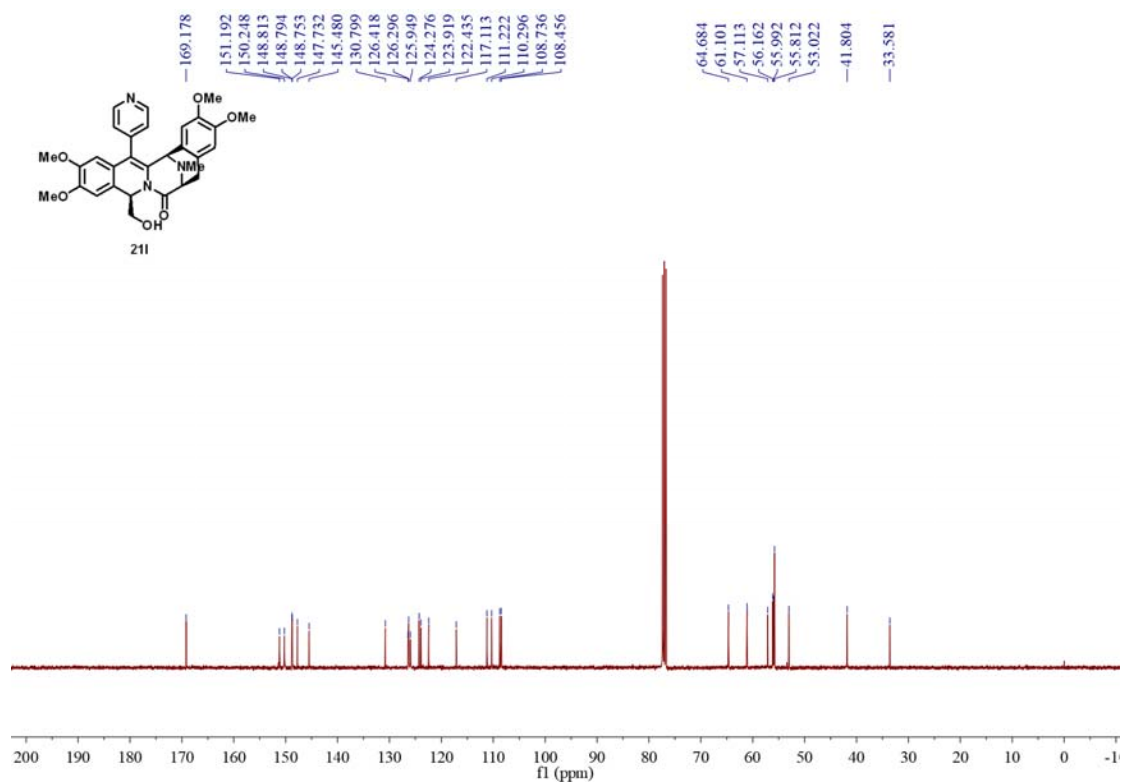

# <sup>1</sup>H NMR Spectrum of 21m (400 MHz, CDCl<sub>3</sub>)

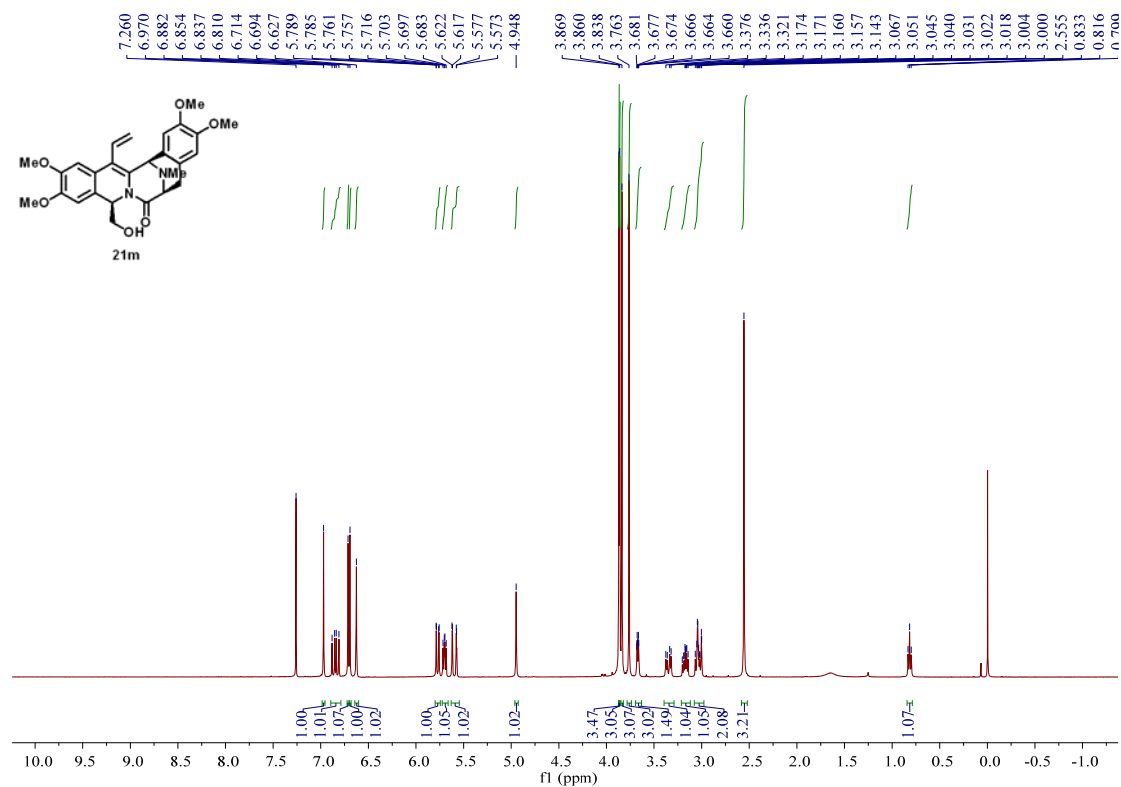

# <sup>13</sup>C NMR Spectrum of 21m (101 MHz, CDCl<sub>3</sub>)

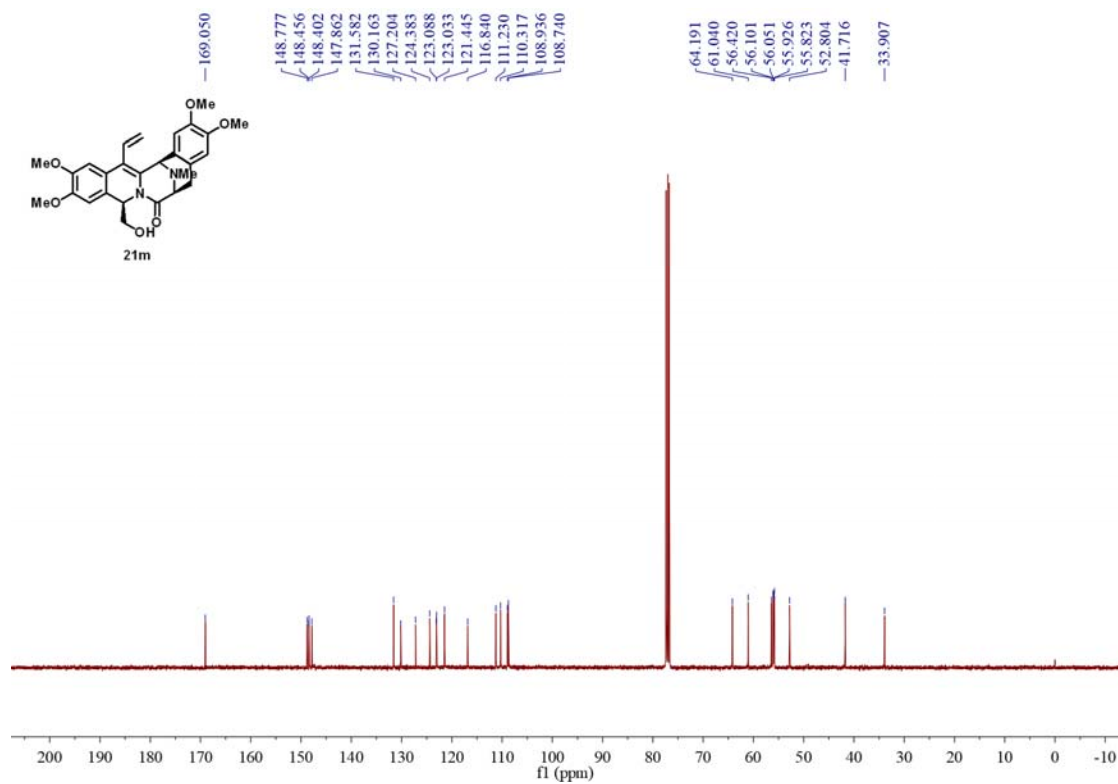

# **<sup>1</sup>H NMR Spectrum of 21n (400 MHz, CDCl<sub>3</sub>)**

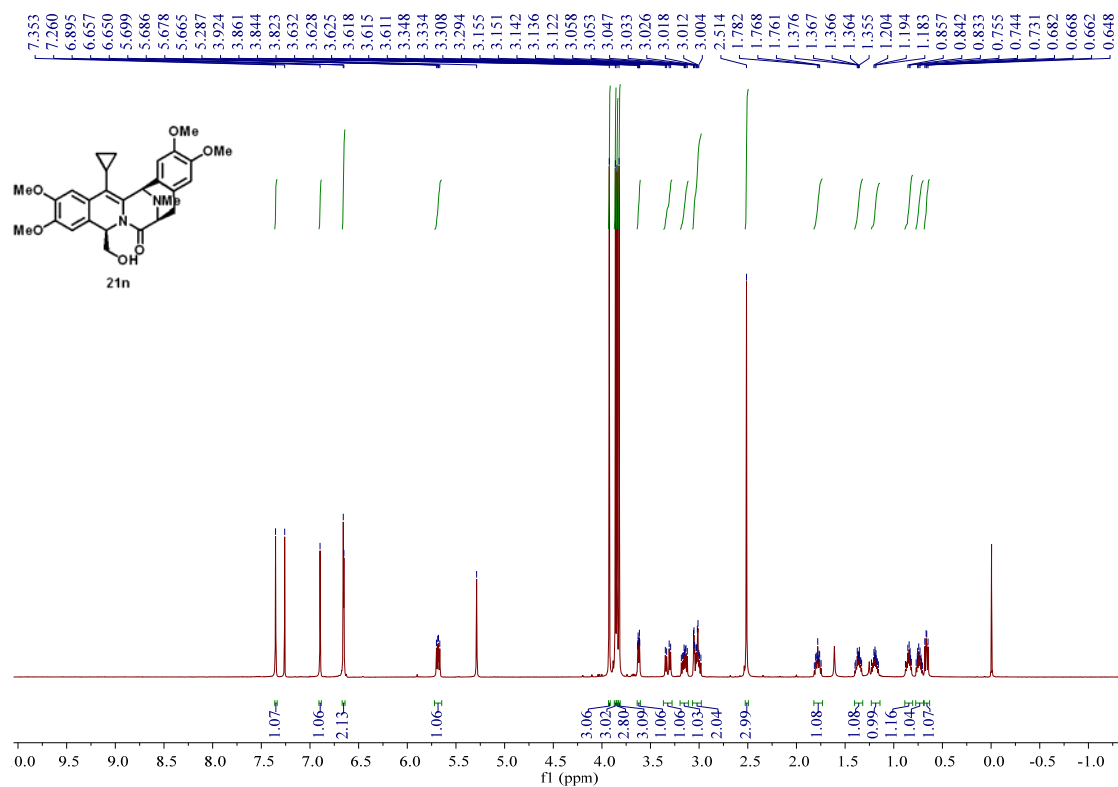

# **<sup>13</sup>C NMR Spectrum of 21n (101 MHz, CDCl<sub>3</sub>)**

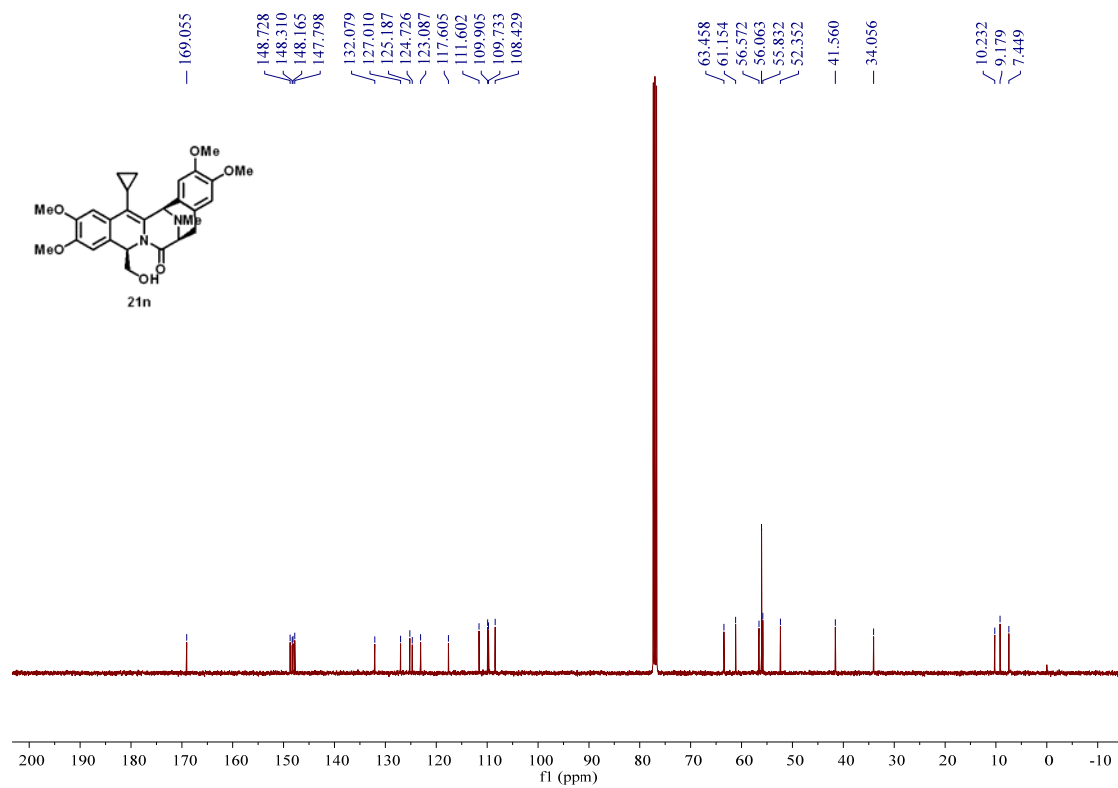

# <sup>1</sup>H NMR Spectrum of 21o (400 MHz, CDCl<sub>3</sub>)

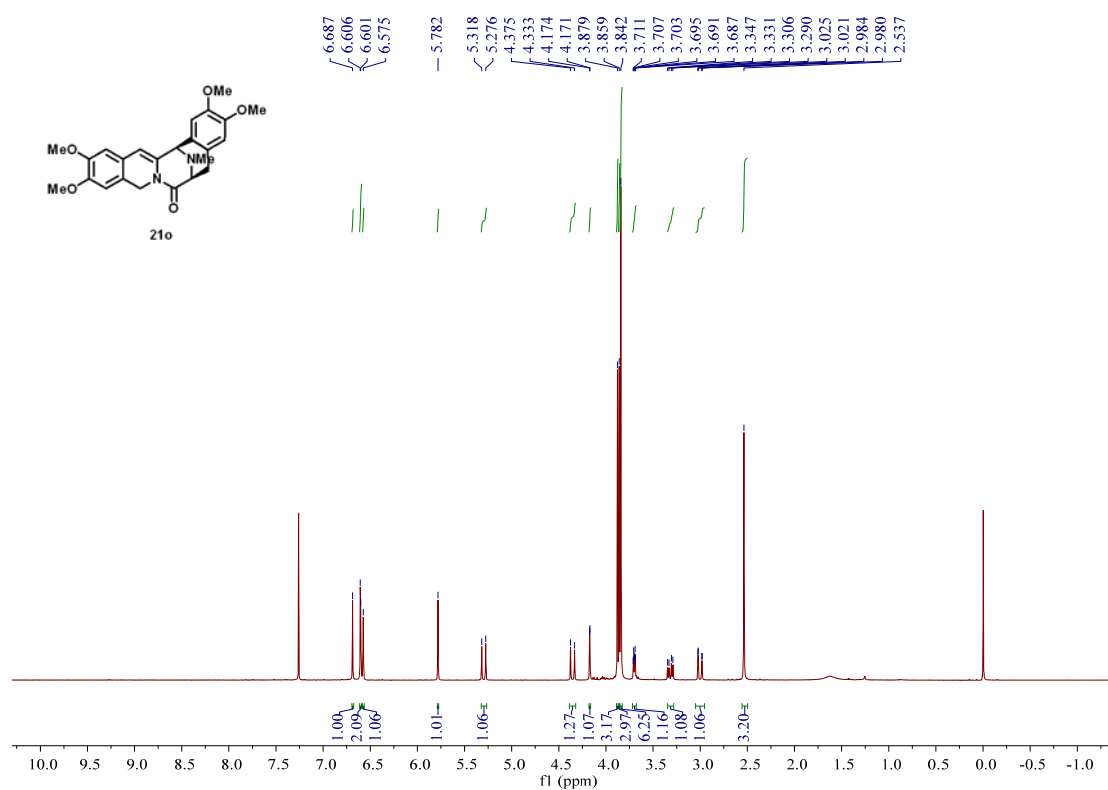

# <sup>13</sup>C NMR Spectrum of 21o (101 MHz, CDCl<sub>3</sub>)

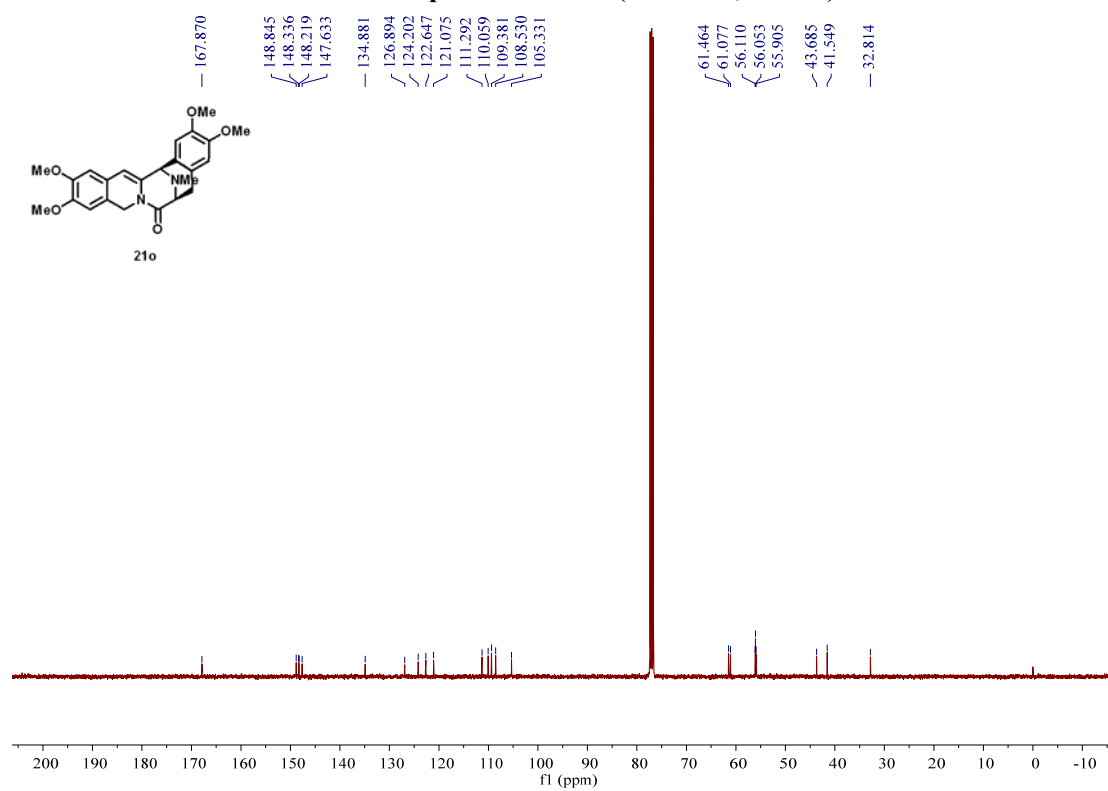

# <sup>1</sup>H NMR Spectrum of 21p (400 MHz, CDCl<sub>3</sub>)

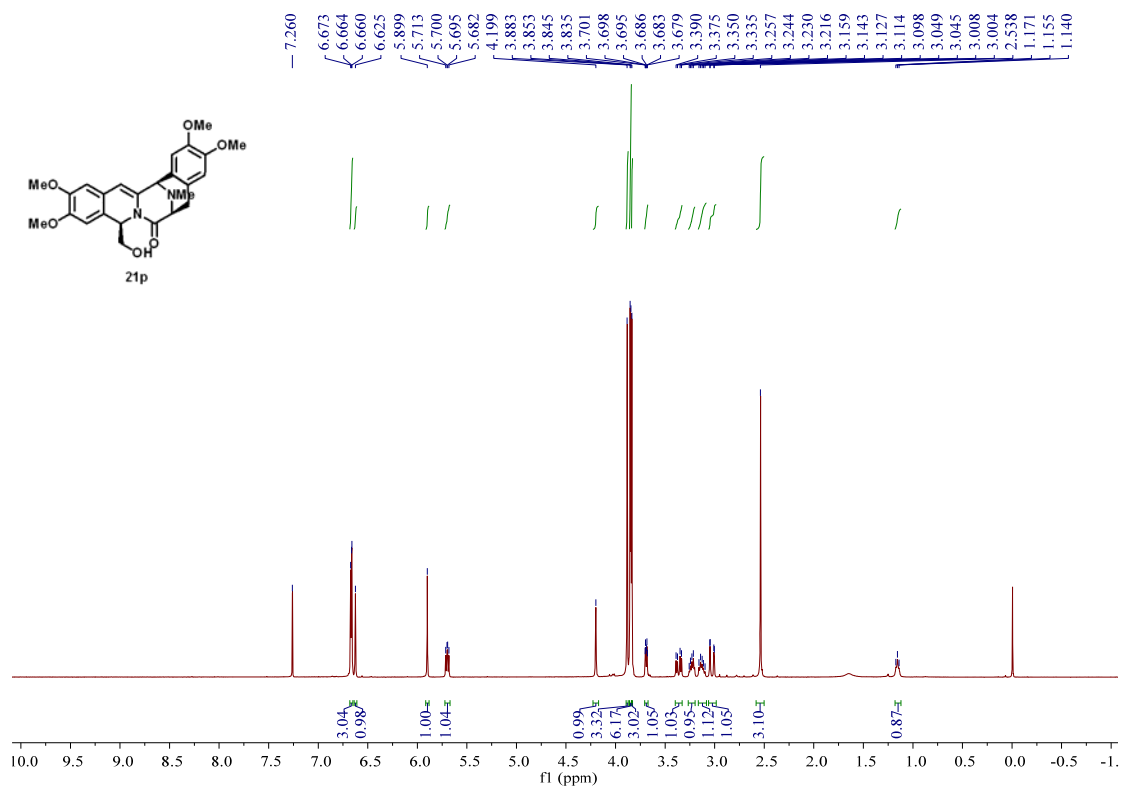

# <sup>13</sup>C NMR Spectrum of 21p (101 MHz, CDCl<sub>3</sub>)

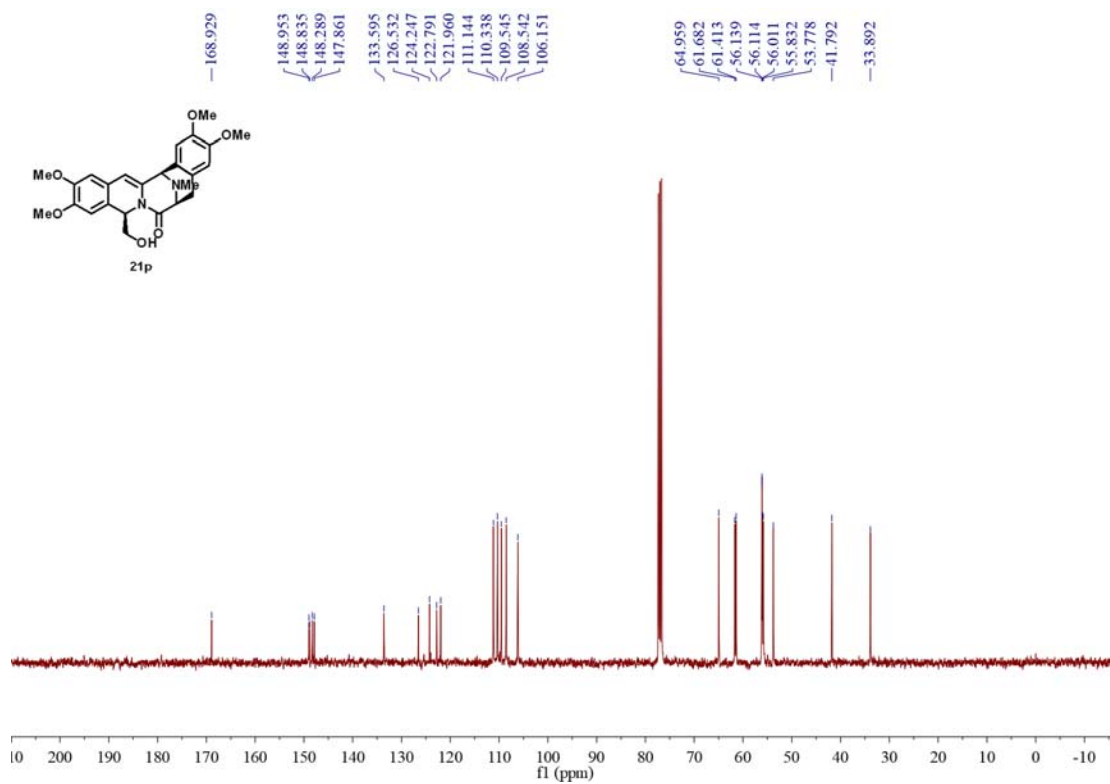

## 5. References

- [1] T. Zhou, R. C. Hider, P. Jenner, S. Rose, B. Campbell, C. J. Hobbs, M. Jairaj, K. A. Tayarani-Binazir and A. Syme, *Eur. J. Med. Chem.*, **2010**, *45*, 4035-4042.
- [2] R. Padma, B. Srinivas, J. S. Yadav and D. K. Mohapatra, *Eur. J. Org. Chem.* **2020**, *13*, 1947-1955.
- [3] E. García, S. Arrasate, A. Ardeo, E. Lete and N. Sotomayor, *J. Org. Chem.* **2005**, *70*, 10368-10374.
- [4] M. Sohora, M. Vazdar, I. Sović, K. Mlinarić -Majerski, N. Basarić, *J. Org. Chem.* **2018**, *83*, 14905-14922.
